# Supplementary material for: Computational analysis of functional SNPs in Alzheimer’s disease-associated endocytosis genes
Source: PeerJ journal article supplement (doi:10.7717/peerj.7667), 2019-09-30
Supplement: Supplemental_Table_S5_Prediction_analysis_of_PICALM_sSNPs.pdf [file Supplemental_Table_S5_Prediction_analysis_of_PICALM_sSNPs.pdf]

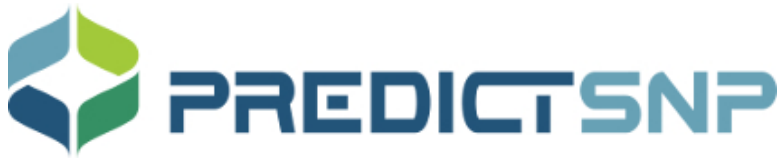

## PredictSNP overview

**Date:** 2017/03/06

**Genome version:** GRCh38/hg38

**PredictSNP version:** 2.1

If you use PredictSNP and obtain scientific results that you publish, we would ask you to acknowledge the usage of PredictSNP by referencing the article below.

Bendl, J., Musil, M., Stourac, J., Zendulka, J., Damborsky, J., Brezovsky, J., 2016: PredictSNP2: A unified platform for accurately evaluating SNP effects by exploiting the different characteristics of variants in distinct genomic regions. *PLOS Computational Biology* 12: e1004962

|            | PredictSNP2 |     | CADD |     | DANN |     | FATHMM |     | FunSeq2 |     | GWAVA |     |
|------------|-------------|-----|------|-----|------|-----|--------|-----|---------|-----|-------|-----|
|            | Neu         | Del | Neu  | Del | Neu  | Del | Neu    | Del | Neu     | Del | Neu   | Del |
| Regulatory | 0           | 0   | 0    | 0   | 0    | 0   | 0      | 0   | 0       | 0   | 0     | 0   |
| Splicing   | 0           | 0   | 0    | 0   | 0    | 0   | 0      | 0   | 0       | 0   | 0     | 0   |
| Missense   | 0           | 0   | 0    | 0   | 0    | 0   | 95     | 5   | 90      | 10  | 94    | 6   |
| Synonymous | 33          | 67  | 96   | 4   | 44   | 46  | 0      | 0   | 0       | 0   | 0     | 0   |
| Nonsense   | 0           | 0   | 0    | 0   | 0    | 0   | 0      | 0   | 0       | 0   | 0     | 0   |
| Others     | 0           | 0   | 0    | 0   | 0    | 0   | 0      | 0   | 0       | 0   | 0     | 0   |

---

**Variant:** 11 : 85974750, G→C

---

|                   |                |                       |            |                     |        |
|-------------------|----------------|-----------------------|------------|---------------------|--------|
| <b>Position:</b>  | chr11:85974750 | <b>Ref. allele:</b>   | G          | <b>Alt. allele:</b> | C      |
| <b>Region:</b>    | exonic         | <b>Exonic. func.:</b> | synonymous | <b>Gene ID:</b>     | PICALM |
| <b>RS number:</b> | -              | <b>Clin. sign.:</b>   | -          |                     |        |

---

**Results**

---

| <b>Tool:</b>          | <b>PredictSNP2</b> | <b>CADD</b> | <b>DANN</b> | <b>FATHMM</b> | <b>FunSeq2</b> | <b>GWAVA</b> |
|-----------------------|--------------------|-------------|-------------|---------------|----------------|--------------|
| <b>Prediction:</b>    | neutral            | neutral     | neutral     | deleterious   | neutral        | neutral      |
| <b>Score:</b>         | -0.5876            | 5.7230      | 0.6814      | 0.8185        | 0.0000         | 0.2400       |
| <b>Exp. accuracy:</b> | 0.93               | 0.92        | 0.94        | 0.57          | 0.93           | 0.58         |

---

**External links**

[GenBank] [UCSC] [Ensemble]

---

---

**Variant:** 11 : 85974777, T→C

---

|                   |                |                       |            |                     |        |
|-------------------|----------------|-----------------------|------------|---------------------|--------|
| <b>Position:</b>  | chr11:85974777 | <b>Ref. allele:</b>   | T          | <b>Alt. allele:</b> | C      |
| <b>Region:</b>    | exonic         | <b>Exonic. func.:</b> | synonymous | <b>Gene ID:</b>     | PICALM |
| <b>RS number:</b> | rs200565799    | <b>Clin. sign.:</b>   | -          |                     |        |

---

**Results**

---

| <b>Tool:</b>          | <b>PredictSNP2</b> | <b>CADD</b> | <b>DANN</b> | <b>FATHMM</b> | <b>FunSeq2</b> | <b>GWAVA</b> |
|-----------------------|--------------------|-------------|-------------|---------------|----------------|--------------|
| <b>Prediction:</b>    | neutral            | neutral     | neutral     | neutral       | neutral        | neutral      |
| <b>Score:</b>         | -1.0000            | 0.0090      | 0.3471      | 0.1083        | 0.0000         | 0.3000       |
| <b>Exp. accuracy:</b> | 0.96               | 0.95        | 0.97        | 0.87          | 0.93           | 0.57         |

---

**External links**

[dbSNP] [GenBank] [HaploReg] [RegulomeDB] [UCSC] [Ensemble]

---

---

**Variant:** 11 : 85974780, C→T

---

|                   |                |                       |            |                     |        |
|-------------------|----------------|-----------------------|------------|---------------------|--------|
| <b>Position:</b>  | chr11:85974780 | <b>Ref. allele:</b>   | C          | <b>Alt. allele:</b> | T      |
| <b>Region:</b>    | exonic         | <b>Exonic. func.:</b> | synonymous | <b>Gene ID:</b>     | PICALM |
| <b>RS number:</b> | -              | <b>Clin. sign.:</b>   | -          |                     |        |

---

**Results**

---

| <b>Tool:</b>          | <b>PredictSNP2</b> | <b>CADD</b> | <b>DANN</b> | <b>FATHMM</b> | <b>FunSeq2</b> | <b>GWAVA</b> |
|-----------------------|--------------------|-------------|-------------|---------------|----------------|--------------|
| <b>Prediction:</b>    | neutral            | neutral     | neutral     | neutral       | neutral        | neutral      |
| <b>Score:</b>         | -1.0000            | 11.8800     | 0.5722      | 0.4095        | 0.0000         | 0.2800       |
| <b>Exp. accuracy:</b> | 0.96               | 0.83        | 0.97        | 0.72          | 0.93           | 0.55         |

---

**External links**

[GenBank] [UCSC] [Ensemble]

---

---

|                   |                    |                       |            |                     |        |
|-------------------|--------------------|-----------------------|------------|---------------------|--------|
| <b>Variant:</b>   | 11 : 85974795, A→G |                       |            |                     |        |
| <b>Position:</b>  | chr11:85974795     | <b>Ref. allele:</b>   | A          | <b>Alt. allele:</b> | G      |
| <b>Region:</b>    | exonic             | <b>Exonic. func.:</b> | synonymous | <b>Gene ID:</b>     | PICALM |
| <b>RS number:</b> | -                  | <b>Clin. sign.:</b>   | -          | -                   | -      |

---

#### Results

| Tool:                 | PredictSNP2 | CADD    | DANN    | FATHMM  | FunSeq2 | GWAVA   |
|-----------------------|-------------|---------|---------|---------|---------|---------|
| <b>Prediction:</b>    | neutral     | neutral | neutral | neutral | neutral | neutral |
| <b>Score:</b>         | -1.0000     | 0.4050  | 0.7045  | 0.6867  | 0.0000  | 0.2200  |
| <b>Exp. accuracy:</b> | 0.96        | 0.95    | 0.94    | 0.69    | 0.93    | 0.59    |

#### External links

[GenBank] [UCSC] [Ensemble]

---



---

|                   |                    |                       |            |                     |        |
|-------------------|--------------------|-----------------------|------------|---------------------|--------|
| <b>Variant:</b>   | 11 : 85974807, T→C |                       |            |                     |        |
| <b>Position:</b>  | chr11:85974807     | <b>Ref. allele:</b>   | T          | <b>Alt. allele:</b> | C      |
| <b>Region:</b>    | exonic             | <b>Exonic. func.:</b> | synonymous | <b>Gene ID:</b>     | PICALM |
| <b>RS number:</b> | -                  | <b>Clin. sign.:</b>   | -          | -                   | -      |

---

#### Results

| Tool:                 | PredictSNP2 | CADD    | DANN    | FATHMM      | FunSeq2 | GWAVA   |
|-----------------------|-------------|---------|---------|-------------|---------|---------|
| <b>Prediction:</b>    | neutral     | neutral | neutral | deleterious | neutral | neutral |
| <b>Score:</b>         | -0.5853     | 5.0280  | 0.7135  | 0.8323      | 0.0000  | 0.2100  |
| <b>Exp. accuracy:</b> | 0.93        | 0.93    | 0.93    | 0.57        | 0.93    | 0.60    |

#### External links

[GenBank] [UCSC] [Ensemble]

---



---

|                   |                    |                       |            |                     |        |
|-------------------|--------------------|-----------------------|------------|---------------------|--------|
| <b>Variant:</b>   | 11 : 85981138, A→C |                       |            |                     |        |
| <b>Position:</b>  | chr11:85981138     | <b>Ref. allele:</b>   | A          | <b>Alt. allele:</b> | C      |
| <b>Region:</b>    | exonic             | <b>Exonic. func.:</b> | synonymous | <b>Gene ID:</b>     | PICALM |
| <b>RS number:</b> | rs76719109         | <b>Clin. sign.:</b>   | -          | -                   | -      |

---

#### Results

| Tool:                 | PredictSNP2 | CADD    | DANN    | FATHMM      | FunSeq2 | GWAVA   |
|-----------------------|-------------|---------|---------|-------------|---------|---------|
| <b>Prediction:</b>    | neutral     | neutral | neutral | deleterious | neutral | neutral |
| <b>Score:</b>         | -0.4724     | 6.8470  | 0.6763  | 0.9410      | 0.0000  | 0.2800  |
| <b>Exp. accuracy:</b> | 0.93        | 0.92    | 0.94    | 0.88        | 0.93    | 0.55    |

#### External links

[dbSNP] [GenBank] [HaploReg] [RegulomeDB] [UCSC] [Ensemble]

---

---

**Variant:** 11 : 85981138, A→T

---

|                   |                |                       |            |                     |        |
|-------------------|----------------|-----------------------|------------|---------------------|--------|
| <b>Position:</b>  | chr11:85981138 | <b>Ref. allele:</b>   | A          | <b>Alt. allele:</b> | T      |
| <b>Region:</b>    | exonic         | <b>Exonic. func.:</b> | synonymous | <b>Gene ID:</b>     | PICALM |
| <b>RS number:</b> | -              | <b>Clin. sign.:</b>   | -          |                     |        |

---

**Results**

---

| <b>Tool:</b>          | <b>PredictSNP2</b> | <b>CADD</b> | <b>DANN</b> | <b>FATHMM</b> | <b>FunSeq2</b> | <b>GWAVA</b> |
|-----------------------|--------------------|-------------|-------------|---------------|----------------|--------------|
| <b>Prediction:</b>    | neutral            | neutral     | neutral     | deleterious   | neutral        | neutral      |
| <b>Score:</b>         | -0.4825            | 6.9340      | 0.6506      | 0.9278        | 0.0000         | 0.2800       |
| <b>Exp. accuracy:</b> | 0.93               | 0.92        | 0.96        | 0.82          | 0.93           | 0.55         |

---

**External links**

[GenBank] [UCSC] [Ensemble]

---

---

**Variant:** 11 : 85981150, G→A

---

|                   |                |                       |            |                     |        |
|-------------------|----------------|-----------------------|------------|---------------------|--------|
| <b>Position:</b>  | chr11:85981150 | <b>Ref. allele:</b>   | G          | <b>Alt. allele:</b> | A      |
| <b>Region:</b>    | exonic         | <b>Exonic. func.:</b> | synonymous | <b>Gene ID:</b>     | PICALM |
| <b>RS number:</b> | rs12295435     | <b>Clin. sign.:</b>   | -          |                     |        |

---

**Results**

---

| <b>Tool:</b>          | <b>PredictSNP2</b> | <b>CADD</b> | <b>DANN</b> | <b>FATHMM</b> | <b>FunSeq2</b> | <b>GWAVA</b> |
|-----------------------|--------------------|-------------|-------------|---------------|----------------|--------------|
| <b>Prediction:</b>    | neutral            | neutral     | neutral     | neutral       | neutral        | neutral      |
| <b>Score:</b>         | -1.0000            | 12.0500     | 0.5906      | 0.4934        | 0.0000         | 0.2600       |
| <b>Exp. accuracy:</b> | 0.96               | 0.83        | 0.97        | 0.70          | 0.93           | 0.54         |

---

**External links**

[dbSNP] [GenBank] [HaploReg] [RegulomeDB] [UCSC] [Ensemble]

---

---

**Variant:** 11 : 85981153, T→C

---

|                   |                |                       |            |                     |        |
|-------------------|----------------|-----------------------|------------|---------------------|--------|
| <b>Position:</b>  | chr11:85981153 | <b>Ref. allele:</b>   | T          | <b>Alt. allele:</b> | C      |
| <b>Region:</b>    | exonic         | <b>Exonic. func.:</b> | synonymous | <b>Gene ID:</b>     | PICALM |
| <b>RS number:</b> | -              | <b>Clin. sign.:</b>   | -          |                     |        |

---

**Results**

---

| <b>Tool:</b>          | <b>PredictSNP2</b> | <b>CADD</b> | <b>DANN</b> | <b>FATHMM</b> | <b>FunSeq2</b> | <b>GWAVA</b> |
|-----------------------|--------------------|-------------|-------------|---------------|----------------|--------------|
| <b>Prediction:</b>    | neutral            | neutral     | neutral     | deleterious   | neutral        | neutral      |
| <b>Score:</b>         | -0.5814            | 8.3060      | 0.7544      | 0.8430        | 0.0000         | 0.2400       |
| <b>Exp. accuracy:</b> | 0.93               | 0.92        | 0.90        | 0.57          | 0.93           | 0.58         |

---

**External links**

[GenBank] [UCSC] [Ensemble]

---

---

|                   |                                    |                       |            |                     |        |
|-------------------|------------------------------------|-----------------------|------------|---------------------|--------|
| <b>Variant:</b>   | 11 : 85981222, <i>T</i> → <i>C</i> |                       |            |                     |        |
| <b>Position:</b>  | chr11:85981222                     | <b>Ref. allele:</b>   | T          | <b>Alt. allele:</b> | C      |
| <b>Region:</b>    | exonic                             | <b>Exonic. func.:</b> | synonymous | <b>Gene ID:</b>     | PICALM |
| <b>RS number:</b> | -                                  | <b>Clin. sign.:</b>   | -          | -                   | -      |

---

#### Results

| Tool:                 | PredictSNP2 | CADD    | DANN    | FATHMM      | FunSeq2 | GWAVA   |
|-----------------------|-------------|---------|---------|-------------|---------|---------|
| <b>Prediction:</b>    | neutral     | neutral | neutral | deleterious | neutral | neutral |
| <b>Score:</b>         | -0.5518     | 9.6600  | 0.7521  | 0.8790      | 0.0000  | 0.2400  |
| <b>Exp. accuracy:</b> | 0.93        | 0.91    | 0.90    | 0.64        | 0.93    | 0.58    |

#### External links

[\[GenBank\]](#) [\[UCSC\]](#) [\[Ensemble\]](#)

---



---

|                   |                                    |                       |            |                     |        |
|-------------------|------------------------------------|-----------------------|------------|---------------------|--------|
| <b>Variant:</b>   | 11 : 85981753, <i>G</i> → <i>A</i> |                       |            |                     |        |
| <b>Position:</b>  | chr11:85981753                     | <b>Ref. allele:</b>   | G          | <b>Alt. allele:</b> | A      |
| <b>Region:</b>    | exonic                             | <b>Exonic. func.:</b> | synonymous | <b>Gene ID:</b>     | PICALM |
| <b>RS number:</b> | -                                  | <b>Clin. sign.:</b>   | -          | -                   | -      |

---

#### Results

| Tool:                 | PredictSNP2 | CADD    | DANN    | FATHMM      | FunSeq2 | GWAVA   |
|-----------------------|-------------|---------|---------|-------------|---------|---------|
| <b>Prediction:</b>    | neutral     | neutral | neutral | deleterious | neutral | neutral |
| <b>Score:</b>         | -0.5867     | 9.6870  | 0.6784  | 0.8295      | 0.0000  | 0.3900  |
| <b>Exp. accuracy:</b> | 0.93        | 0.91    | 0.94    | 0.57        | 0.93    | 0.52    |

#### External links

[\[GenBank\]](#) [\[UCSC\]](#) [\[Ensemble\]](#)

---



---

|                   |                                    |                       |            |                     |        |
|-------------------|------------------------------------|-----------------------|------------|---------------------|--------|
| <b>Variant:</b>   | 11 : 85981762, <i>T</i> → <i>A</i> |                       |            |                     |        |
| <b>Position:</b>  | chr11:85981762                     | <b>Ref. allele:</b>   | T          | <b>Alt. allele:</b> | A      |
| <b>Region:</b>    | exonic                             | <b>Exonic. func.:</b> | synonymous | <b>Gene ID:</b>     | PICALM |
| <b>RS number:</b> | -                                  | <b>Clin. sign.:</b>   | -          | -                   | -      |

---

#### Results

| Tool:                 | PredictSNP2 | CADD    | DANN    | FATHMM      | FunSeq2 | GWAVA   |
|-----------------------|-------------|---------|---------|-------------|---------|---------|
| <b>Prediction:</b>    | neutral     | neutral | neutral | deleterious | neutral | neutral |
| <b>Score:</b>         | -0.4534     | 7.7210  | 0.6798  | 0.9539      | 0.0000  | 0.4200  |
| <b>Exp. accuracy:</b> | 0.93        | 0.91    | 0.94    | 0.92        | 0.93    | 0.54    |

#### External links

[\[GenBank\]](#) [\[UCSC\]](#) [\[Ensemble\]](#)

---

---

**Variant:** 11 : 85981765, G→A

---

|                   |                |                       |            |                     |        |
|-------------------|----------------|-----------------------|------------|---------------------|--------|
| <b>Position:</b>  | chr11:85981765 | <b>Ref. allele:</b>   | G          | <b>Alt. allele:</b> | A      |
| <b>Region:</b>    | exonic         | <b>Exonic. func.:</b> | synonymous | <b>Gene ID:</b>     | PICALM |
| <b>RS number:</b> | -              | <b>Clin. sign.:</b>   | -          |                     |        |

**Results**

---

| <b>Tool:</b>          | <b>PredictSNP2</b> | <b>CADD</b> | <b>DANN</b> | <b>FATHMM</b> | <b>FunSeq2</b> | <b>GWAVA</b> |
|-----------------------|--------------------|-------------|-------------|---------------|----------------|--------------|
| <b>Prediction:</b>    | neutral            | neutral     | neutral     | neutral       | neutral        | neutral      |
| <b>Score:</b>         | -1.0000            | 11.1000     | 0.7879      | 0.2926        | 0.0000         | 0.4600       |
| <b>Exp. accuracy:</b> | 0.96               | 0.88        | 0.89        | 0.73          | 0.93           | 0.54         |

**External links**

[GenBank] [UCSC] [Ensemble]

---



---

**Variant:** 11 : 85981873, G→A

---

|                   |                |                       |            |                     |        |
|-------------------|----------------|-----------------------|------------|---------------------|--------|
| <b>Position:</b>  | chr11:85981873 | <b>Ref. allele:</b>   | G          | <b>Alt. allele:</b> | A      |
| <b>Region:</b>    | exonic         | <b>Exonic. func.:</b> | synonymous | <b>Gene ID:</b>     | PICALM |
| <b>RS number:</b> | rs371001564    | <b>Clin. sign.:</b>   | -          |                     |        |

**Results**

---

| <b>Tool:</b>          | <b>PredictSNP2</b> | <b>CADD</b> | <b>DANN</b> | <b>FATHMM</b> | <b>FunSeq2</b> | <b>GWAVA</b> |
|-----------------------|--------------------|-------------|-------------|---------------|----------------|--------------|
| <b>Prediction:</b>    | neutral            | neutral     | neutral     | deleterious   | neutral        | neutral      |
| <b>Score:</b>         | -0.4266            | 13.5900     | 0.8618      | 0.9569        | 0.0000         | 0.4300       |
| <b>Exp. accuracy:</b> | 0.88               | 0.73        | 0.90        | 0.93          | 0.93           | 0.54         |

**External links**

[dbSNP] [GenBank] [RegulomeDB] [UCSC] [Ensemble]

---



---

**Variant:** 11 : 85981903, G→A

---

|                   |                |                       |            |                     |        |
|-------------------|----------------|-----------------------|------------|---------------------|--------|
| <b>Position:</b>  | chr11:85981903 | <b>Ref. allele:</b>   | G          | <b>Alt. allele:</b> | A      |
| <b>Region:</b>    | exonic         | <b>Exonic. func.:</b> | synonymous | <b>Gene ID:</b>     | PICALM |
| <b>RS number:</b> | -              | <b>Clin. sign.:</b>   | -          |                     |        |

**Results**

---

| <b>Tool:</b>          | <b>PredictSNP2</b> | <b>CADD</b> | <b>DANN</b> | <b>FATHMM</b> | <b>FunSeq2</b> | <b>GWAVA</b> |
|-----------------------|--------------------|-------------|-------------|---------------|----------------|--------------|
| <b>Prediction:</b>    | neutral            | neutral     | neutral     | deleterious   | neutral        | neutral      |
| <b>Score:</b>         | -0.4624            | 12.2500     | 0.5484      | 0.9565        | 0.0000         | 0.4000       |
| <b>Exp. accuracy:</b> | 0.93               | 0.83        | 0.97        | 0.93          | 0.93           | 0.56         |

**External links**

[GenBank] [UCSC] [Ensemble]

---

---

**Variant:** 11 : 85981942, A→C

|                   |                |                       |            |                     |        |
|-------------------|----------------|-----------------------|------------|---------------------|--------|
| <b>Position:</b>  | chr11:85981942 | <b>Ref. allele:</b>   | A          | <b>Alt. allele:</b> | C      |
| <b>Region:</b>    | exonic         | <b>Exonic. func.:</b> | synonymous | <b>Gene ID:</b>     | PICALM |
| <b>RS number:</b> | -              | <b>Clin. sign.:</b>   | -          |                     |        |

---

**Results**

| <b>Tool:</b>          | <b>PredictSNP2</b> | <b>CADD</b> | <b>DANN</b> | <b>FATHMM</b> | <b>FunSeq2</b> | <b>GWAVA</b> |
|-----------------------|--------------------|-------------|-------------|---------------|----------------|--------------|
| <b>Prediction:</b>    | neutral            | neutral     | neutral     | deleterious   | neutral        | neutral      |
| <b>Score:</b>         | -0.5683            | 0.1730      | 0.6676      | 0.8631        | 0.0000         | 0.4300       |
| <b>Exp. accuracy:</b> | 0.93               | 0.95        | 0.95        | 0.60          | 0.93           | 0.54         |

**External links**

[GenBank] [UCSC] [Ensemble]

---



---

**Variant:** 11 : 85981945, A→G

|                   |                |                       |            |                     |        |
|-------------------|----------------|-----------------------|------------|---------------------|--------|
| <b>Position:</b>  | chr11:85981945 | <b>Ref. allele:</b>   | A          | <b>Alt. allele:</b> | G      |
| <b>Region:</b>    | exonic         | <b>Exonic. func.:</b> | synonymous | <b>Gene ID:</b>     | PICALM |
| <b>RS number:</b> | -              | <b>Clin. sign.:</b>   | -          |                     |        |

---

**Results**

| <b>Tool:</b>          | <b>PredictSNP2</b> | <b>CADD</b> | <b>DANN</b> | <b>FATHMM</b> | <b>FunSeq2</b> | <b>GWAVA</b> |
|-----------------------|--------------------|-------------|-------------|---------------|----------------|--------------|
| <b>Prediction:</b>    | neutral            | neutral     | neutral     | deleterious   | neutral        | neutral      |
| <b>Score:</b>         | -0.4553            | 9.1930      | 0.7753      | 0.9543        | 0.0000         | 0.4700       |
| <b>Exp. accuracy:</b> | 0.93               | 0.92        | 0.90        | 0.92          | 0.93           | 0.54         |

**External links**

[GenBank] [UCSC] [Ensemble]

---



---

**Variant:** 11 : 85981972, T→C

|                   |                |                       |            |                     |        |
|-------------------|----------------|-----------------------|------------|---------------------|--------|
| <b>Position:</b>  | chr11:85981972 | <b>Ref. allele:</b>   | T          | <b>Alt. allele:</b> | C      |
| <b>Region:</b>    | exonic         | <b>Exonic. func.:</b> | synonymous | <b>Gene ID:</b>     | PICALM |
| <b>RS number:</b> | -              | <b>Clin. sign.:</b>   | -          |                     |        |

---

**Results**

| <b>Tool:</b>          | <b>PredictSNP2</b> | <b>CADD</b> | <b>DANN</b> | <b>FATHMM</b> | <b>FunSeq2</b> | <b>GWAVA</b> |
|-----------------------|--------------------|-------------|-------------|---------------|----------------|--------------|
| <b>Prediction:</b>    | neutral            | neutral     | neutral     | deleterious   | neutral        | neutral      |
| <b>Score:</b>         | -0.5184            | 7.4540      | 0.6746      | 0.9028        | 0.0000         | 0.4300       |
| <b>Exp. accuracy:</b> | 0.93               | 0.91        | 0.94        | 0.75          | 0.93           | 0.54         |

**External links**

[GenBank] [UCSC] [Ensemble]

---

---

**Variant:** 11 : 85983936, T→G

---

|                   |                |                       |            |                     |        |
|-------------------|----------------|-----------------------|------------|---------------------|--------|
| <b>Position:</b>  | chr11:85983936 | <b>Ref. allele:</b>   | T          | <b>Alt. allele:</b> | G      |
| <b>Region:</b>    | exonic         | <b>Exonic. func.:</b> | synonymous | <b>Gene ID:</b>     | PICALM |
| <b>RS number:</b> | -              | <b>Clin. sign.:</b>   | -          |                     |        |

---

**Results**

---

|                       |                    |             |             |               |                |              |
|-----------------------|--------------------|-------------|-------------|---------------|----------------|--------------|
| <b>Tool:</b>          | <b>PredictSNP2</b> | <b>CADD</b> | <b>DANN</b> | <b>FATHMM</b> | <b>FunSeq2</b> | <b>GWAVA</b> |
| <b>Prediction:</b>    | neutral            | neutral     | neutral     | deleterious   | neutral        | deleterious  |
| <b>Score:</b>         | -0.4801            | 10.2000     | 0.6877      | 0.9275        | 0.0000         | 0.6000       |
| <b>Exp. accuracy:</b> | 0.93               | 0.88        | 0.94        | 0.82          | 0.93           | 0.64         |

---

**External links**

[GenBank] [UCSC] [Ensemble]

---

---

**Variant:** 11 : 85983951, T→G

---

|                   |                |                       |            |                     |        |
|-------------------|----------------|-----------------------|------------|---------------------|--------|
| <b>Position:</b>  | chr11:85983951 | <b>Ref. allele:</b>   | T          | <b>Alt. allele:</b> | G      |
| <b>Region:</b>    | exonic         | <b>Exonic. func.:</b> | synonymous | <b>Gene ID:</b>     | PICALM |
| <b>RS number:</b> | -              | <b>Clin. sign.:</b>   | -          |                     |        |

---

**Results**

---

|                       |                    |             |             |               |                |              |
|-----------------------|--------------------|-------------|-------------|---------------|----------------|--------------|
| <b>Tool:</b>          | <b>PredictSNP2</b> | <b>CADD</b> | <b>DANN</b> | <b>FATHMM</b> | <b>FunSeq2</b> | <b>GWAVA</b> |
| <b>Prediction:</b>    | neutral            | neutral     | neutral     | deleterious   | neutral        | deleterious  |
| <b>Score:</b>         | -0.5321            | 7.6520      | 0.6450      | 0.8891        | 0.0000         | 0.6000       |
| <b>Exp. accuracy:</b> | 0.93               | 0.91        | 0.96        | 0.68          | 0.93           | 0.64         |

---

**External links**

[GenBank] [UCSC] [Ensemble]

---

---

**Variant:** 11 : 85983957, T→C

---

|                   |                |                       |            |                     |        |
|-------------------|----------------|-----------------------|------------|---------------------|--------|
| <b>Position:</b>  | chr11:85983957 | <b>Ref. allele:</b>   | T          | <b>Alt. allele:</b> | C      |
| <b>Region:</b>    | exonic         | <b>Exonic. func.:</b> | synonymous | <b>Gene ID:</b>     | PICALM |
| <b>RS number:</b> | rs149179479    | <b>Clin. sign.:</b>   | -          |                     |        |

---

**Results**

---

|                       |                    |             |             |               |                |              |
|-----------------------|--------------------|-------------|-------------|---------------|----------------|--------------|
| <b>Tool:</b>          | <b>PredictSNP2</b> | <b>CADD</b> | <b>DANN</b> | <b>FATHMM</b> | <b>FunSeq2</b> | <b>GWAVA</b> |
| <b>Prediction:</b>    | neutral            | neutral     | neutral     | deleterious   | neutral        | deleterious  |
| <b>Score:</b>         | -0.5823            | 7.8000      | 0.7254      | 0.7912        | 0.0000         | 0.5500       |
| <b>Exp. accuracy:</b> | 0.93               | 0.91        | 0.93        | 0.57          | 0.93           | 0.66         |

---

**External links**

[dbSNP] [GenBank] [HaploReg] [RegulomeDB] [UCSC] [Ensemble]

---



---

**Variant:** 11 : 85990278, A→C

---

|                   |                |                       |            |                     |        |
|-------------------|----------------|-----------------------|------------|---------------------|--------|
| <b>Position:</b>  | chr11:85990278 | <b>Ref. allele:</b>   | A          | <b>Alt. allele:</b> | C      |
| <b>Region:</b>    | exonic         | <b>Exonic. func.:</b> | synonymous | <b>Gene ID:</b>     | PICALM |
| <b>RS number:</b> | -              | <b>Clin. sign.:</b>   | -          |                     |        |

---

**Results**

---

| <b>Tool:</b>          | <b>PredictSNP2</b> | <b>CADD</b> | <b>DANN</b> | <b>FATHMM</b> | <b>FunSeq2</b> | <b>GWAVA</b> |
|-----------------------|--------------------|-------------|-------------|---------------|----------------|--------------|
| <b>Prediction:</b>    | neutral            | neutral     | neutral     | deleterious   | neutral        | neutral      |
| <b>Score:</b>         | -0.4171            | 0.6510      | 0.7134      | 0.9916        | 0.0000         | 0.4400       |
| <b>Exp. accuracy:</b> | 0.88               | 0.95        | 0.93        | 0.97          | 0.93           | 0.54         |

---

**External links**

[GenBank] [UCSC] [Ensemble]

---

---

**Variant:** 11 : 85990287, A→G

---

|                   |                |                       |            |                     |        |
|-------------------|----------------|-----------------------|------------|---------------------|--------|
| <b>Position:</b>  | chr11:85990287 | <b>Ref. allele:</b>   | A          | <b>Alt. allele:</b> | G      |
| <b>Region:</b>    | exonic         | <b>Exonic. func.:</b> | synonymous | <b>Gene ID:</b>     | PICALM |
| <b>RS number:</b> | -              | <b>Clin. sign.:</b>   | -          |                     |        |

---

**Results**

---

| <b>Tool:</b>          | <b>PredictSNP2</b> | <b>CADD</b> | <b>DANN</b> | <b>FATHMM</b> | <b>FunSeq2</b> | <b>GWAVA</b> |
|-----------------------|--------------------|-------------|-------------|---------------|----------------|--------------|
| <b>Prediction:</b>    | neutral            | neutral     | neutral     | deleterious   | neutral        | neutral      |
| <b>Score:</b>         | -0.5284            | 0.1160      | 0.7023      | 0.8933        | 0.0000         | 0.4300       |
| <b>Exp. accuracy:</b> | 0.93               | 0.95        | 0.94        | 0.71          | 0.93           | 0.54         |

---

**External links**

[GenBank] [UCSC] [Ensemble]

---

---

**Variant:** 11 : 85990320, A→G

---

|                   |                |                       |            |                     |        |
|-------------------|----------------|-----------------------|------------|---------------------|--------|
| <b>Position:</b>  | chr11:85990320 | <b>Ref. allele:</b>   | A          | <b>Alt. allele:</b> | G      |
| <b>Region:</b>    | exonic         | <b>Exonic. func.:</b> | synonymous | <b>Gene ID:</b>     | PICALM |
| <b>RS number:</b> | -              | <b>Clin. sign.:</b>   | -          |                     |        |

---

**Results**

---

| <b>Tool:</b>          | <b>PredictSNP2</b> | <b>CADD</b> | <b>DANN</b> | <b>FATHMM</b> | <b>FunSeq2</b> | <b>GWAVA</b> |
|-----------------------|--------------------|-------------|-------------|---------------|----------------|--------------|
| <b>Prediction:</b>    | neutral            | neutral     | neutral     | deleterious   | neutral        | neutral      |
| <b>Score:</b>         | -0.4707            | 6.7040      | 0.5990      | 0.9514        | 0.0000         | 0.4700       |
| <b>Exp. accuracy:</b> | 0.93               | 0.92        | 0.96        | 0.91          | 0.93           | 0.54         |

---

**External links**

[GenBank] [UCSC] [Ensemble]

---

---

**Variant:** 11 : 85990338, G→A

---

|                   |                |                       |            |                     |        |
|-------------------|----------------|-----------------------|------------|---------------------|--------|
| <b>Position:</b>  | chr11:85990338 | <b>Ref. allele:</b>   | G          | <b>Alt. allele:</b> | A      |
| <b>Region:</b>    | exonic         | <b>Exonic. func.:</b> | synonymous | <b>Gene ID:</b>     | PICALM |
| <b>RS number:</b> | -              | <b>Clin. sign.:</b>   | -          |                     |        |

**Results**

---

| <b>Tool:</b>          | <b>PredictSNP2</b> | <b>CADD</b> | <b>DANN</b> | <b>FATHMM</b> | <b>FunSeq2</b> | <b>GWAVA</b> |
|-----------------------|--------------------|-------------|-------------|---------------|----------------|--------------|
| <b>Prediction:</b>    | neutral            | neutral     | neutral     | deleterious   | neutral        | deleterious  |
| <b>Score:</b>         | -0.5100            | 9.7780      | 0.7530      | 0.9068        | 0.0000         | 0.5000       |
| <b>Exp. accuracy:</b> | 0.93               | 0.91        | 0.90        | 0.75          | 0.93           | 0.51         |

**External links**

[GenBank] [UCSC] [Ensemble]

---



---

**Variant:** 11 : 85990344, A→G

---

|                   |                |                       |            |                     |        |
|-------------------|----------------|-----------------------|------------|---------------------|--------|
| <b>Position:</b>  | chr11:85990344 | <b>Ref. allele:</b>   | A          | <b>Alt. allele:</b> | G      |
| <b>Region:</b>    | exonic         | <b>Exonic. func.:</b> | synonymous | <b>Gene ID:</b>     | PICALM |
| <b>RS number:</b> | -              | <b>Clin. sign.:</b>   | -          |                     |        |

**Results**

---

| <b>Tool:</b>          | <b>PredictSNP2</b> | <b>CADD</b> | <b>DANN</b> | <b>FATHMM</b> | <b>FunSeq2</b> | <b>GWAVA</b> |
|-----------------------|--------------------|-------------|-------------|---------------|----------------|--------------|
| <b>Prediction:</b>    | neutral            | neutral     | neutral     | deleterious   | neutral        | ?            |
| <b>Score:</b>         | -0.4148            | 4.3540      | 0.7340      | 0.9908        | 0.0000         | 0.4900       |
| <b>Exp. accuracy:</b> | 0.88               | 0.94        | 0.91        | 0.97          | 0.93           | 0.43         |

**External links**

[GenBank] [UCSC] [Ensemble]

---



---

**Variant:** 11 : 85990368, A→G

---

|                   |                |                       |            |                     |        |
|-------------------|----------------|-----------------------|------------|---------------------|--------|
| <b>Position:</b>  | chr11:85990368 | <b>Ref. allele:</b>   | A          | <b>Alt. allele:</b> | G      |
| <b>Region:</b>    | exonic         | <b>Exonic. func.:</b> | synonymous | <b>Gene ID:</b>     | PICALM |
| <b>RS number:</b> | -              | <b>Clin. sign.:</b>   | -          |                     |        |

**Results**

---

| <b>Tool:</b>          | <b>PredictSNP2</b> | <b>CADD</b> | <b>DANN</b> | <b>FATHMM</b> | <b>FunSeq2</b> | <b>GWAVA</b> |
|-----------------------|--------------------|-------------|-------------|---------------|----------------|--------------|
| <b>Prediction:</b>    | neutral            | neutral     | neutral     | deleterious   | neutral        | ?            |
| <b>Score:</b>         | -0.5362            | 8.6900      | 0.5310      | 0.9008        | 0.0000         | 0.4900       |
| <b>Exp. accuracy:</b> | 0.93               | 0.92        | 0.97        | 0.71          | 0.93           | 0.43         |

**External links**

[GenBank] [UCSC] [Ensemble]

---

---

**Variant:** 11 : 85990371, A→C

---

|                   |                |                       |            |                     |        |
|-------------------|----------------|-----------------------|------------|---------------------|--------|
| <b>Position:</b>  | chr11:85990371 | <b>Ref. allele:</b>   | A          | <b>Alt. allele:</b> | C      |
| <b>Region:</b>    | exonic         | <b>Exonic. func.:</b> | synonymous | <b>Gene ID:</b>     | PICALM |
| <b>RS number:</b> | -              | <b>Clin. sign.:</b>   | -          |                     |        |

---

**Results**

---

|                       |                    |             |             |               |                |              |
|-----------------------|--------------------|-------------|-------------|---------------|----------------|--------------|
| <b>Tool:</b>          | <b>PredictSNP2</b> | <b>CADD</b> | <b>DANN</b> | <b>FATHMM</b> | <b>FunSeq2</b> | <b>GWAVA</b> |
| <b>Prediction:</b>    | neutral            | neutral     | neutral     | deleterious   | neutral        | ?            |
| <b>Score:</b>         | -0.5219            | 0.6420      | 0.7202      | 0.9000        | 0.0000         | 0.4900       |
| <b>Exp. accuracy:</b> | 0.93               | 0.95        | 0.93        | 0.71          | 0.93           | 0.43         |

---

**External links**

[GenBank] [UCSC] [Ensemble]

---

---

**Variant:** 11 : 85990371, A→G

---

|                   |                |                       |            |                     |        |
|-------------------|----------------|-----------------------|------------|---------------------|--------|
| <b>Position:</b>  | chr11:85990371 | <b>Ref. allele:</b>   | A          | <b>Alt. allele:</b> | G      |
| <b>Region:</b>    | exonic         | <b>Exonic. func.:</b> | synonymous | <b>Gene ID:</b>     | PICALM |
| <b>RS number:</b> | -              | <b>Clin. sign.:</b>   | -          |                     |        |

---

**Results**

---

|                       |                    |             |             |               |                |              |
|-----------------------|--------------------|-------------|-------------|---------------|----------------|--------------|
| <b>Tool:</b>          | <b>PredictSNP2</b> | <b>CADD</b> | <b>DANN</b> | <b>FATHMM</b> | <b>FunSeq2</b> | <b>GWAVA</b> |
| <b>Prediction:</b>    | neutral            | neutral     | neutral     | deleterious   | neutral        | ?            |
| <b>Score:</b>         | -0.5482            | 6.9260      | 0.7300      | 0.8794        | 0.0000         | 0.4900       |
| <b>Exp. accuracy:</b> | 0.93               | 0.92        | 0.91        | 0.64          | 0.93           | 0.43         |

---

**External links**

[GenBank] [UCSC] [Ensemble]

---

---

**Variant:** 11 : 85996869, T→C

---

|                   |                |                       |            |                     |        |
|-------------------|----------------|-----------------------|------------|---------------------|--------|
| <b>Position:</b>  | chr11:85996869 | <b>Ref. allele:</b>   | T          | <b>Alt. allele:</b> | C      |
| <b>Region:</b>    | exonic         | <b>Exonic. func.:</b> | synonymous | <b>Gene ID:</b>     | PICALM |
| <b>RS number:</b> | rs151035490    | <b>Clin. sign.:</b>   | -          |                     |        |

---

**Results**

---

|                       |                    |             |             |               |                |              |
|-----------------------|--------------------|-------------|-------------|---------------|----------------|--------------|
| <b>Tool:</b>          | <b>PredictSNP2</b> | <b>CADD</b> | <b>DANN</b> | <b>FATHMM</b> | <b>FunSeq2</b> | <b>GWAVA</b> |
| <b>Prediction:</b>    | neutral            | neutral     | neutral     | neutral       | neutral        | deleterious  |
| <b>Score:</b>         | -1.0000            | 6.9350      | 0.7513      | 0.7689        | 0.0000         | 0.5600       |
| <b>Exp. accuracy:</b> | 0.96               | 0.92        | 0.90        | 0.69          | 0.93           | 0.69         |

---

**External links**

[dbSNP] [GenBank] [HaploReg] [RegulomeDB] [UCSC] [Ensemble]

---

---

**Variant:** 11 : 85996869, T→G

---

|                   |                |                       |            |                     |        |
|-------------------|----------------|-----------------------|------------|---------------------|--------|
| <b>Position:</b>  | chr11:85996869 | <b>Ref. allele:</b>   | T          | <b>Alt. allele:</b> | G      |
| <b>Region:</b>    | exonic         | <b>Exonic. func.:</b> | synonymous | <b>Gene ID:</b>     | PICALM |
| <b>RS number:</b> | -              | <b>Clin. sign.:</b>   | -          |                     |        |

---

**Results**

---

|                       |                    |             |             |               |                |              |
|-----------------------|--------------------|-------------|-------------|---------------|----------------|--------------|
| <b>Tool:</b>          | <b>PredictSNP2</b> | <b>CADD</b> | <b>DANN</b> | <b>FATHMM</b> | <b>FunSeq2</b> | <b>GWAVA</b> |
| <b>Prediction:</b>    | neutral            | neutral     | neutral     | deleterious   | neutral        | deleterious  |
| <b>Score:</b>         | -0.5621            | 8.6160      | 0.7347      | 0.8684        | 0.0000         | 0.5600       |
| <b>Exp. accuracy:</b> | 0.93               | 0.92        | 0.91        | 0.60          | 0.93           | 0.69         |

---

**External links**

[GenBank] [UCSC] [Ensemble]

---

---

**Variant:** 11 : 85996890, C→T

---

|                   |                |                       |            |                     |        |
|-------------------|----------------|-----------------------|------------|---------------------|--------|
| <b>Position:</b>  | chr11:85996890 | <b>Ref. allele:</b>   | C          | <b>Alt. allele:</b> | T      |
| <b>Region:</b>    | exonic         | <b>Exonic. func.:</b> | synonymous | <b>Gene ID:</b>     | PICALM |
| <b>RS number:</b> | rs372958249    | <b>Clin. sign.:</b>   | -          |                     |        |

---

**Results**

---

|                       |                    |             |             |               |                |              |
|-----------------------|--------------------|-------------|-------------|---------------|----------------|--------------|
| <b>Tool:</b>          | <b>PredictSNP2</b> | <b>CADD</b> | <b>DANN</b> | <b>FATHMM</b> | <b>FunSeq2</b> | <b>GWAVA</b> |
| <b>Prediction:</b>    | neutral            | neutral     | neutral     | deleterious   | neutral        | deleterious  |
| <b>Score:</b>         | -0.4350            | 13.7700     | 0.7898      | 0.9566        | 0.0000         | 0.5300       |
| <b>Exp. accuracy:</b> | 0.88               | 0.73        | 0.89        | 0.93          | 0.93           | 0.64         |

---

**External links**

[dbSNP] [GenBank] [RegulomeDB] [UCSC] [Ensemble]

---

---

**Variant:** 11 : 85996893, C→T

---

|                   |                |                       |            |                     |        |
|-------------------|----------------|-----------------------|------------|---------------------|--------|
| <b>Position:</b>  | chr11:85996893 | <b>Ref. allele:</b>   | C          | <b>Alt. allele:</b> | T      |
| <b>Region:</b>    | exonic         | <b>Exonic. func.:</b> | synonymous | <b>Gene ID:</b>     | PICALM |
| <b>RS number:</b> | -              | <b>Clin. sign.:</b>   | -          |                     |        |

---

**Results**

---

|                       |                    |             |             |               |                |              |
|-----------------------|--------------------|-------------|-------------|---------------|----------------|--------------|
| <b>Tool:</b>          | <b>PredictSNP2</b> | <b>CADD</b> | <b>DANN</b> | <b>FATHMM</b> | <b>FunSeq2</b> | <b>GWAVA</b> |
| <b>Prediction:</b>    | neutral            | neutral     | neutral     | neutral       | neutral        | deleterious  |
| <b>Score:</b>         | -1.0000            | 12.7100     | 0.5206      | 0.0505        | 0.0000         | 0.5400       |
| <b>Exp. accuracy:</b> | 0.96               | 0.79        | 0.97        | 0.94          | 0.93           | 0.62         |

---

**External links**

[GenBank] [UCSC] [Ensemble]

---

---

**Variante:** 11 : 85996908, A→G

---

|                   |                |                       |            |                     |        |
|-------------------|----------------|-----------------------|------------|---------------------|--------|
| <b>Position:</b>  | chr11:85996908 | <b>Ref. allele:</b>   | A          | <b>Alt. allele:</b> | G      |
| <b>Region:</b>    | exonic         | <b>Exonic. func.:</b> | synonymous | <b>Gene ID:</b>     | PICALM |
| <b>RS number:</b> | -              | <b>Clin. sign.:</b>   | -          |                     |        |

**Results**

---

|                       |                    |             |             |               |                |              |
|-----------------------|--------------------|-------------|-------------|---------------|----------------|--------------|
| <b>Tool:</b>          | <b>PredictSNP2</b> | <b>CADD</b> | <b>DANN</b> | <b>FATHMM</b> | <b>FunSeq2</b> | <b>GWAVA</b> |
| <b>Prediction:</b>    | neutral            | neutral     | neutral     | neutral       | neutral        | deleterious  |
| <b>Score:</b>         | -1.0000            | 5.1300      | 0.5613      | 0.6872        | 0.0000         | 0.5000       |
| <b>Exp. accuracy:</b> | 0.96               | 0.93        | 0.97        | 0.69          | 0.93           | 0.51         |

**External links**

[GenBank] [UCSC] [Ensemble]

---



---

**Variante:** 11 : 85996917, C→A

---

|                   |                |                       |            |                     |        |
|-------------------|----------------|-----------------------|------------|---------------------|--------|
| <b>Position:</b>  | chr11:85996917 | <b>Ref. allele:</b>   | C          | <b>Alt. allele:</b> | A      |
| <b>Region:</b>    | exonic         | <b>Exonic. func.:</b> | synonymous | <b>Gene ID:</b>     | PICALM |
| <b>RS number:</b> | -              | <b>Clin. sign.:</b>   | -          |                     |        |

**Results**

---

|                       |                    |             |             |               |                |              |
|-----------------------|--------------------|-------------|-------------|---------------|----------------|--------------|
| <b>Tool:</b>          | <b>PredictSNP2</b> | <b>CADD</b> | <b>DANN</b> | <b>FATHMM</b> | <b>FunSeq2</b> | <b>GWAVA</b> |
| <b>Prediction:</b>    | neutral            | neutral     | neutral     | deleterious   | neutral        | deleterious  |
| <b>Score:</b>         | -0.4656            | 15.2900     | 0.7052      | 0.9333        | 0.0000         | 0.5000       |
| <b>Exp. accuracy:</b> | 0.93               | 0.73        | 0.93        | 0.86          | 0.93           | 0.51         |

**External links**

[GenBank] [UCSC] [Ensemble]

---



---

**Variante:** 11 : 85996923, T→C

---

|                   |                |                       |            |                     |        |
|-------------------|----------------|-----------------------|------------|---------------------|--------|
| <b>Position:</b>  | chr11:85996923 | <b>Ref. allele:</b>   | T          | <b>Alt. allele:</b> | C      |
| <b>Region:</b>    | exonic         | <b>Exonic. func.:</b> | synonymous | <b>Gene ID:</b>     | PICALM |
| <b>RS number:</b> | -              | <b>Clin. sign.:</b>   | -          |                     |        |

**Results**

---

|                       |                    |             |             |               |                |              |
|-----------------------|--------------------|-------------|-------------|---------------|----------------|--------------|
| <b>Tool:</b>          | <b>PredictSNP2</b> | <b>CADD</b> | <b>DANN</b> | <b>FATHMM</b> | <b>FunSeq2</b> | <b>GWAVA</b> |
| <b>Prediction:</b>    | neutral            | neutral     | neutral     | deleterious   | neutral        | deleterious  |
| <b>Score:</b>         | -0.5841            | 7.9990      | 0.7160      | 0.8225        | 0.0000         | 0.5400       |
| <b>Exp. accuracy:</b> | 0.93               | 0.91        | 0.93        | 0.57          | 0.93           | 0.62         |

**External links**

[GenBank] [UCSC] [Ensemble]

---

---

**Variant:** 11 : 86000660, G→A

---

|                   |                |                       |            |                     |        |
|-------------------|----------------|-----------------------|------------|---------------------|--------|
| <b>Position:</b>  | chr11:86000660 | <b>Ref. allele:</b>   | G          | <b>Alt. allele:</b> | A      |
| <b>Region:</b>    | exonic         | <b>Exonic. func.:</b> | synonymous | <b>Gene ID:</b>     | PICALM |
| <b>RS number:</b> | -              | <b>Clin. sign.:</b>   | -          |                     |        |

---

**Results**

---

|                       |                    |             |             |               |                |              |
|-----------------------|--------------------|-------------|-------------|---------------|----------------|--------------|
| <b>Tool:</b>          | <b>PredictSNP2</b> | <b>CADD</b> | <b>DANN</b> | <b>FATHMM</b> | <b>FunSeq2</b> | <b>GWAVA</b> |
| <b>Prediction:</b>    | neutral            | neutral     | neutral     | deleterious   | neutral        | deleterious  |
| <b>Score:</b>         | -0.5888            | 11.7200     | 0.6518      | 0.8446        | 0.0000         | 0.5600       |
| <b>Exp. accuracy:</b> | 0.93               | 0.83        | 0.96        | 0.57          | 0.93           | 0.69         |

---

**External links**

[GenBank] [UCSC] [Ensemble]

---



---

**Variant:** 11 : 86000660, G→T

---

|                   |                |                       |            |                     |        |
|-------------------|----------------|-----------------------|------------|---------------------|--------|
| <b>Position:</b>  | chr11:86000660 | <b>Ref. allele:</b>   | G          | <b>Alt. allele:</b> | T      |
| <b>Region:</b>    | exonic         | <b>Exonic. func.:</b> | synonymous | <b>Gene ID:</b>     | PICALM |
| <b>RS number:</b> | -              | <b>Clin. sign.:</b>   | -          |                     |        |

---

**Results**

---

|                       |                    |             |             |               |                |              |
|-----------------------|--------------------|-------------|-------------|---------------|----------------|--------------|
| <b>Tool:</b>          | <b>PredictSNP2</b> | <b>CADD</b> | <b>DANN</b> | <b>FATHMM</b> | <b>FunSeq2</b> | <b>GWAVA</b> |
| <b>Prediction:</b>    | neutral            | neutral     | neutral     | neutral       | neutral        | deleterious  |
| <b>Score:</b>         | -1.0000            | 10.1300     | 0.6781      | 0.7739        | 0.0000         | 0.5600       |
| <b>Exp. accuracy:</b> | 0.96               | 0.88        | 0.94        | 0.69          | 0.93           | 0.69         |

---

**External links**

[GenBank] [UCSC] [Ensemble]

---



---

**Variant:** 11 : 86000678, G→A

---

|                   |                |                       |            |                     |        |
|-------------------|----------------|-----------------------|------------|---------------------|--------|
| <b>Position:</b>  | chr11:86000678 | <b>Ref. allele:</b>   | G          | <b>Alt. allele:</b> | A      |
| <b>Region:</b>    | exonic         | <b>Exonic. func.:</b> | synonymous | <b>Gene ID:</b>     | PICALM |
| <b>RS number:</b> | rs145725396    | <b>Clin. sign.:</b>   | -          |                     |        |

---

**Results**

---

|                       |                    |             |             |               |                |              |
|-----------------------|--------------------|-------------|-------------|---------------|----------------|--------------|
| <b>Tool:</b>          | <b>PredictSNP2</b> | <b>CADD</b> | <b>DANN</b> | <b>FATHMM</b> | <b>FunSeq2</b> | <b>GWAVA</b> |
| <b>Prediction:</b>    | neutral            | neutral     | neutral     | deleterious   | neutral        | deleterious  |
| <b>Score:</b>         | -0.4137            | 13.9400     | 0.6360      | 0.9874        | 0.0000         | 0.5700       |
| <b>Exp. accuracy:</b> | 0.88               | 0.73        | 0.97        | 0.97          | 0.93           | 0.68         |

---

**External links**

[dbSNP] [GenBank] [HaploReg] [RegulomeDB] [UCSC] [Ensemble]

---

---

**Variant:** 11 : 86000684, T→G

---

|                   |                |                       |            |                     |        |
|-------------------|----------------|-----------------------|------------|---------------------|--------|
| <b>Position:</b>  | chr11:86000684 | <b>Ref. allele:</b>   | T          | <b>Alt. allele:</b> | G      |
| <b>Region:</b>    | exonic         | <b>Exonic. func.:</b> | synonymous | <b>Gene ID:</b>     | PICALM |
| <b>RS number:</b> | rs200575473    | <b>Clin. sign.:</b>   | -          |                     | -      |

---

**Results**

---

|                       |                    |             |             |               |                |              |
|-----------------------|--------------------|-------------|-------------|---------------|----------------|--------------|
| <b>Tool:</b>          | <b>PredictSNP2</b> | <b>CADD</b> | <b>DANN</b> | <b>FATHMM</b> | <b>FunSeq2</b> | <b>GWAVA</b> |
| <b>Prediction:</b>    | neutral            | neutral     | neutral     | deleterious   | neutral        | deleterious  |
| <b>Score:</b>         | -0.4812            | 11.6500     | 0.6654      | 0.9279        | 0.0000         | 0.6300       |
| <b>Exp. accuracy:</b> | 0.93               | 0.83        | 0.95        | 0.82          | 0.93           | 0.66         |

---

**External links**

---

[dbSNP] [GenBank] [HaploReg] [RegulomeDB] [UCSC] [Ensemble]

---

---

**Variant:** 11 : 86000687, A→G

---

|                   |                |                       |            |                     |        |
|-------------------|----------------|-----------------------|------------|---------------------|--------|
| <b>Position:</b>  | chr11:86000687 | <b>Ref. allele:</b>   | A          | <b>Alt. allele:</b> | G      |
| <b>Region:</b>    | exonic         | <b>Exonic. func.:</b> | synonymous | <b>Gene ID:</b>     | PICALM |
| <b>RS number:</b> | -              | <b>Clin. sign.:</b>   | -          |                     | -      |

---

**Results**

---

|                       |                    |             |             |               |                |              |
|-----------------------|--------------------|-------------|-------------|---------------|----------------|--------------|
| <b>Tool:</b>          | <b>PredictSNP2</b> | <b>CADD</b> | <b>DANN</b> | <b>FATHMM</b> | <b>FunSeq2</b> | <b>GWAVA</b> |
| <b>Prediction:</b>    | neutral            | neutral     | neutral     | deleterious   | neutral        | deleterious  |
| <b>Score:</b>         | -0.5654            | 9.2110      | 0.7452      | 0.8623        | 0.0000         | 0.6100       |
| <b>Exp. accuracy:</b> | 0.93               | 0.91        | 0.91        | 0.57          | 0.93           | 0.64         |

---

**External links**

---

[GenBank] [UCSC] [Ensemble]

---

---

**Variant:** 11 : 86000696, C→A

---

|                   |                |                       |            |                     |        |
|-------------------|----------------|-----------------------|------------|---------------------|--------|
| <b>Position:</b>  | chr11:86000696 | <b>Ref. allele:</b>   | C          | <b>Alt. allele:</b> | A      |
| <b>Region:</b>    | exonic         | <b>Exonic. func.:</b> | synonymous | <b>Gene ID:</b>     | PICALM |
| <b>RS number:</b> | -              | <b>Clin. sign.:</b>   | -          |                     | -      |

---

**Results**

---

|                       |                    |             |             |               |                |              |
|-----------------------|--------------------|-------------|-------------|---------------|----------------|--------------|
| <b>Tool:</b>          | <b>PredictSNP2</b> | <b>CADD</b> | <b>DANN</b> | <b>FATHMM</b> | <b>FunSeq2</b> | <b>GWAVA</b> |
| <b>Prediction:</b>    | neutral            | deleterious | neutral     | neutral       | neutral        | deleterious  |
| <b>Score:</b>         | -0.6078            | 16.4500     | 0.6252      | 0.4003        | 0.0000         | 0.6500       |
| <b>Exp. accuracy:</b> | 0.95               | 0.58        | 0.96        | 0.72          | 0.93           | 0.70         |

---

**External links**

---

[GenBank] [UCSC] [Ensemble]

---

---

**Variant:** 11 : 86000696, C→T

---

|                   |                |                       |            |                     |        |
|-------------------|----------------|-----------------------|------------|---------------------|--------|
| <b>Position:</b>  | chr11:86000696 | <b>Ref. allele:</b>   | C          | <b>Alt. allele:</b> | T      |
| <b>Region:</b>    | exonic         | <b>Exonic. func.:</b> | synonymous | <b>Gene ID:</b>     | PICALM |
| <b>RS number:</b> | -              | <b>Clin. sign.:</b>   | -          |                     |        |

---

**Results**

---

|                       |                    |             |             |               |                |              |
|-----------------------|--------------------|-------------|-------------|---------------|----------------|--------------|
| <b>Tool:</b>          | <b>PredictSNP2</b> | <b>CADD</b> | <b>DANN</b> | <b>FATHMM</b> | <b>FunSeq2</b> | <b>GWAVA</b> |
| <b>Prediction:</b>    | neutral            | neutral     | neutral     | neutral       | neutral        | deleterious  |
| <b>Score:</b>         | -1.0000            | 13.3300     | 0.6099      | 0.5595        | 0.0000         | 0.6500       |
| <b>Exp. accuracy:</b> | 0.96               | 0.74        | 0.96        | 0.70          | 0.93           | 0.70         |

---

**External links**

[GenBank] [UCSC] [Ensemble]

---

---

**Variant:** 11 : 86000702, T→G

---

|                   |                |                       |            |                     |        |
|-------------------|----------------|-----------------------|------------|---------------------|--------|
| <b>Position:</b>  | chr11:86000702 | <b>Ref. allele:</b>   | T          | <b>Alt. allele:</b> | G      |
| <b>Region:</b>    | exonic         | <b>Exonic. func.:</b> | synonymous | <b>Gene ID:</b>     | PICALM |
| <b>RS number:</b> | -              | <b>Clin. sign.:</b>   | -          |                     |        |

---

**Results**

---

|                       |                    |             |             |               |                |              |
|-----------------------|--------------------|-------------|-------------|---------------|----------------|--------------|
| <b>Tool:</b>          | <b>PredictSNP2</b> | <b>CADD</b> | <b>DANN</b> | <b>FATHMM</b> | <b>FunSeq2</b> | <b>GWAVA</b> |
| <b>Prediction:</b>    | neutral            | neutral     | neutral     | deleterious   | neutral        | deleterious  |
| <b>Score:</b>         | -0.5370            | 10.2900     | 0.5631      | 0.8959        | 0.0000         | 0.5800       |
| <b>Exp. accuracy:</b> | 0.93               | 0.88        | 0.97        | 0.71          | 0.93           | 0.65         |

---

**External links**

[GenBank] [UCSC] [Ensemble]

---

---

**Variant:** 11 : 86000714, T→C

---

|                   |                |                       |            |                     |        |
|-------------------|----------------|-----------------------|------------|---------------------|--------|
| <b>Position:</b>  | chr11:86000714 | <b>Ref. allele:</b>   | T          | <b>Alt. allele:</b> | C      |
| <b>Region:</b>    | exonic         | <b>Exonic. func.:</b> | synonymous | <b>Gene ID:</b>     | PICALM |
| <b>RS number:</b> | rs141849542    | <b>Clin. sign.:</b>   | -          |                     |        |

---

**Results**

---

|                       |                    |             |             |               |                |              |
|-----------------------|--------------------|-------------|-------------|---------------|----------------|--------------|
| <b>Tool:</b>          | <b>PredictSNP2</b> | <b>CADD</b> | <b>DANN</b> | <b>FATHMM</b> | <b>FunSeq2</b> | <b>GWAVA</b> |
| <b>Prediction:</b>    | neutral            | neutral     | neutral     | neutral       | neutral        | deleterious  |
| <b>Score:</b>         | -1.0000            | 9.2410      | 0.7283      | 0.6247        | 0.0000         | 0.6000       |
| <b>Exp. accuracy:</b> | 0.96               | 0.91        | 0.93        | 0.69          | 0.93           | 0.64         |

---

**External links**

[dbSNP] [GenBank] [HaploReg] [RegulomeDB] [UCSC] [Ensemble]

---



---

**Variant:** 11 : 86000729, A→G

---

|                   |                |                       |            |                     |        |
|-------------------|----------------|-----------------------|------------|---------------------|--------|
| <b>Position:</b>  | chr11:86000729 | <b>Ref. allele:</b>   | A          | <b>Alt. allele:</b> | G      |
| <b>Region:</b>    | exonic         | <b>Exonic. func.:</b> | synonymous | <b>Gene ID:</b>     | PICALM |
| <b>RS number:</b> | rs201745810    | <b>Clin. sign.:</b>   | -          |                     | -      |

**Results**

---

| <b>Tool:</b>          | <b>PredictSNP2</b> | <b>CADD</b> | <b>DANN</b> | <b>FATHMM</b> | <b>FunSeq2</b> | <b>GWAVA</b> |
|-----------------------|--------------------|-------------|-------------|---------------|----------------|--------------|
| <b>Prediction:</b>    | neutral            | neutral     | neutral     | neutral       | neutral        | deleterious  |
| <b>Score:</b>         | -1.0000            | 9.8280      | 0.7121      | 0.2832        | 0.0000         | 0.6000       |
| <b>Exp. accuracy:</b> | 0.96               | 0.91        | 0.93        | 0.73          | 0.93           | 0.64         |

**External links**

---

[dbSNP] [GenBank] [HaploReg] [RegulomeDB] [UCSC] [Ensemble]

---



---

**Variant:** 11 : 86000762, T→C

---

|                   |                |                       |            |                     |        |
|-------------------|----------------|-----------------------|------------|---------------------|--------|
| <b>Position:</b>  | chr11:86000762 | <b>Ref. allele:</b>   | T          | <b>Alt. allele:</b> | C      |
| <b>Region:</b>    | exonic         | <b>Exonic. func.:</b> | synonymous | <b>Gene ID:</b>     | PICALM |
| <b>RS number:</b> | rs150582057    | <b>Clin. sign.:</b>   | -          |                     | -      |

**Results**

---

| <b>Tool:</b>          | <b>PredictSNP2</b> | <b>CADD</b> | <b>DANN</b> | <b>FATHMM</b> | <b>FunSeq2</b> | <b>GWAVA</b> |
|-----------------------|--------------------|-------------|-------------|---------------|----------------|--------------|
| <b>Prediction:</b>    | neutral            | neutral     | neutral     | deleterious   | neutral        | deleterious  |
| <b>Score:</b>         | -0.5452            | 8.5530      | 0.5867      | 0.8825        | 0.0000         | 0.6700       |
| <b>Exp. accuracy:</b> | 0.93               | 0.92        | 0.97        | 0.64          | 0.93           | 0.70         |

**External links**

---

[dbSNP] [GenBank] [HaploReg] [RegulomeDB] [UCSC] [Ensemble]

---



---

**Variant:** 11 : 86000768, T→A

---

|                   |                |                       |            |                     |        |
|-------------------|----------------|-----------------------|------------|---------------------|--------|
| <b>Position:</b>  | chr11:86000768 | <b>Ref. allele:</b>   | T          | <b>Alt. allele:</b> | A      |
| <b>Region:</b>    | exonic         | <b>Exonic. func.:</b> | synonymous | <b>Gene ID:</b>     | PICALM |
| <b>RS number:</b> | -              | <b>Clin. sign.:</b>   | -          |                     | -      |

**Results**

---

| <b>Tool:</b>          | <b>PredictSNP2</b> | <b>CADD</b> | <b>DANN</b> | <b>FATHMM</b> | <b>FunSeq2</b> | <b>GWAVA</b> |
|-----------------------|--------------------|-------------|-------------|---------------|----------------|--------------|
| <b>Prediction:</b>    | neutral            | neutral     | neutral     | deleterious   | neutral        | deleterious  |
| <b>Score:</b>         | -0.5501            | 11.6200     | 0.7071      | 0.8778        | 0.0000         | 0.6600       |
| <b>Exp. accuracy:</b> | 0.93               | 0.88        | 0.93        | 0.64          | 0.93           | 0.70         |

**External links**

---

[GenBank] [UCSC] [Ensemble]

---

---

**Variant:** 11 : 86000774, C→T

---

|                   |                |                       |            |                     |        |
|-------------------|----------------|-----------------------|------------|---------------------|--------|
| <b>Position:</b>  | chr11:86000774 | <b>Ref. allele:</b>   | C          | <b>Alt. allele:</b> | T      |
| <b>Region:</b>    | exonic         | <b>Exonic. func.:</b> | synonymous | <b>Gene ID:</b>     | PICALM |
| <b>RS number:</b> | rs372267972    | <b>Clin. sign.:</b>   | -          |                     |        |

---

**Results**

---

| <b>Tool:</b>          | <b>PredictSNP2</b> | <b>CADD</b> | <b>DANN</b> | <b>FATHMM</b> | <b>FunSeq2</b> | <b>GWAVA</b> |
|-----------------------|--------------------|-------------|-------------|---------------|----------------|--------------|
| <b>Prediction:</b>    | neutral            | neutral     | neutral     | deleterious   | neutral        | deleterious  |
| <b>Score:</b>         | -0.5807            | 13.6800     | 0.6379      | 0.8103        | 0.0000         | 0.7400       |
| <b>Exp. accuracy:</b> | 0.93               | 0.73        | 0.97        | 0.57          | 0.93           | 0.70         |

---

**External links**

---

[dbSNP] [GenBank] [RegulomeDB] [UCSC] [Ensemble]

---

---

**Variant:** 11 : 86001062, T→C

---

|                   |                |                       |            |                     |        |
|-------------------|----------------|-----------------------|------------|---------------------|--------|
| <b>Position:</b>  | chr11:86001062 | <b>Ref. allele:</b>   | T          | <b>Alt. allele:</b> | C      |
| <b>Region:</b>    | exonic         | <b>Exonic. func.:</b> | synonymous | <b>Gene ID:</b>     | PICALM |
| <b>RS number:</b> | -              | <b>Clin. sign.:</b>   | -          |                     |        |

---

**Results**

---

| <b>Tool:</b>          | <b>PredictSNP2</b> | <b>CADD</b> | <b>DANN</b> | <b>FATHMM</b> | <b>FunSeq2</b> | <b>GWAVA</b> |
|-----------------------|--------------------|-------------|-------------|---------------|----------------|--------------|
| <b>Prediction:</b>    | neutral            | neutral     | neutral     | deleterious   | neutral        | deleterious  |
| <b>Score:</b>         | -0.5280            | 4.1600      | 0.6360      | 0.8956        | 0.0000         | 0.5100       |
| <b>Exp. accuracy:</b> | 0.93               | 0.94        | 0.97        | 0.71          | 0.93           | 0.55         |

---

**External links**

---

[GenBank] [UCSC] [Ensemble]

---

---

**Variant:** 11 : 86001071, T→A

---

|                   |                |                       |            |                     |        |
|-------------------|----------------|-----------------------|------------|---------------------|--------|
| <b>Position:</b>  | chr11:86001071 | <b>Ref. allele:</b>   | T          | <b>Alt. allele:</b> | A      |
| <b>Region:</b>    | exonic         | <b>Exonic. func.:</b> | synonymous | <b>Gene ID:</b>     | PICALM |
| <b>RS number:</b> | -              | <b>Clin. sign.:</b>   | -          |                     |        |

---

**Results**

---

| <b>Tool:</b>          | <b>PredictSNP2</b> | <b>CADD</b> | <b>DANN</b> | <b>FATHMM</b> | <b>FunSeq2</b> | <b>GWAVA</b> |
|-----------------------|--------------------|-------------|-------------|---------------|----------------|--------------|
| <b>Prediction:</b>    | neutral            | neutral     | neutral     | neutral       | neutral        | deleterious  |
| <b>Score:</b>         | -1.0000            | 15.3200     | 0.6531      | 0.5199        | 0.0000         | 0.5800       |
| <b>Exp. accuracy:</b> | 0.96               | 0.73        | 0.96        | 0.70          | 0.93           | 0.65         |

---

**External links**

---

[GenBank] [UCSC] [Ensemble]

---

---

|                   |                    |                       |            |                     |        |
|-------------------|--------------------|-----------------------|------------|---------------------|--------|
| <b>Variant:</b>   | 11 : 86001071, T→G |                       |            |                     |        |
| <b>Position:</b>  | chr11:86001071     | <b>Ref. allele:</b>   | T          | <b>Alt. allele:</b> | G      |
| <b>Region:</b>    | exonic             | <b>Exonic. func.:</b> | synonymous | <b>Gene ID:</b>     | PICALM |
| <b>RS number:</b> | -                  | <b>Clin. sign.:</b>   | -          | -                   | -      |

---

#### Results

| Tool:                 | PredictSNP2 | CADD    | DANN    | FATHMM  | FunSeq2 | GWAVA       |
|-----------------------|-------------|---------|---------|---------|---------|-------------|
| <b>Prediction:</b>    | neutral     | neutral | neutral | neutral | neutral | deleterious |
| <b>Score:</b>         | -1.0000     | 13.1200 | 0.6518  | 0.5751  | 0.0000  | 0.5800      |
| <b>Exp. accuracy:</b> | 0.96        | 0.74    | 0.96    | 0.70    | 0.93    | 0.65        |

#### External links

[GenBank] [UCSC] [Ensemble]

---



---

|                   |                    |                       |            |                     |        |
|-------------------|--------------------|-----------------------|------------|---------------------|--------|
| <b>Variant:</b>   | 11 : 86001080, C→T |                       |            |                     |        |
| <b>Position:</b>  | chr11:86001080     | <b>Ref. allele:</b>   | C          | <b>Alt. allele:</b> | T      |
| <b>Region:</b>    | exonic             | <b>Exonic. func.:</b> | synonymous | <b>Gene ID:</b>     | PICALM |
| <b>RS number:</b> | -                  | <b>Clin. sign.:</b>   | -          | -                   | -      |

---

#### Results

| Tool:                 | PredictSNP2 | CADD    | DANN    | FATHMM      | FunSeq2 | GWAVA       |
|-----------------------|-------------|---------|---------|-------------|---------|-------------|
| <b>Prediction:</b>    | neutral     | neutral | neutral | deleterious | neutral | deleterious |
| <b>Score:</b>         | -0.5855     | 14.6800 | 0.5928  | 0.8509      | 0.0000  | 0.5600      |
| <b>Exp. accuracy:</b> | 0.93        | 0.73    | 0.96    | 0.57        | 0.93    | 0.69        |

#### External links

[GenBank] [UCSC] [Ensemble]

---



---

|                   |                    |                       |            |                     |        |
|-------------------|--------------------|-----------------------|------------|---------------------|--------|
| <b>Variant:</b>   | 11 : 86001095, C→T |                       |            |                     |        |
| <b>Position:</b>  | chr11:86001095     | <b>Ref. allele:</b>   | C          | <b>Alt. allele:</b> | T      |
| <b>Region:</b>    | exonic             | <b>Exonic. func.:</b> | synonymous | <b>Gene ID:</b>     | PICALM |
| <b>RS number:</b> | -                  | <b>Clin. sign.:</b>   | -          | -                   | -      |

---

#### Results

| Tool:                 | PredictSNP2 | CADD    | DANN    | FATHMM      | FunSeq2 | GWAVA       |
|-----------------------|-------------|---------|---------|-------------|---------|-------------|
| <b>Prediction:</b>    | neutral     | neutral | neutral | deleterious | neutral | deleterious |
| <b>Score:</b>         | -0.5079     | 13.8400 | 0.7642  | 0.9016      | 0.0000  | 0.5000      |
| <b>Exp. accuracy:</b> | 0.93        | 0.73    | 0.90    | 0.71        | 0.93    | 0.51        |

#### External links

[GenBank] [UCSC] [Ensemble]

---

---

**Variant:** 11 : 86001101, *G*→*C*

---

|                   |                |                       |            |                     |        |
|-------------------|----------------|-----------------------|------------|---------------------|--------|
| <b>Position:</b>  | chr11:86001101 | <b>Ref. allele:</b>   | G          | <b>Alt. allele:</b> | C      |
| <b>Region:</b>    | exonic         | <b>Exonic. func.:</b> | synonymous | <b>Gene ID:</b>     | PICALM |
| <b>RS number:</b> | -              | <b>Clin. sign.:</b>   | -          | -                   | -      |

---

**Results**

---

|                       |                    |             |             |               |                |              |
|-----------------------|--------------------|-------------|-------------|---------------|----------------|--------------|
| <b>Tool:</b>          | <b>PredictSNP2</b> | <b>CADD</b> | <b>DANN</b> | <b>FATHMM</b> | <b>FunSeq2</b> | <b>GWAVA</b> |
| <b>Prediction:</b>    | neutral            | neutral     | neutral     | deleterious   | neutral        | deleterious  |
| <b>Score:</b>         | -0.4781            | 9.1710      | 0.6993      | 0.9416        | 0.0000         | 0.5100       |
| <b>Exp. accuracy:</b> | 0.93               | 0.92        | 0.94        | 0.88          | 0.93           | 0.55         |

---

**External links**

[GenBank] [UCSC] [Ensemble]

---

---

**Variant:** 11 : 86001106, *G*→*A*

---

|                   |                |                       |            |                     |        |
|-------------------|----------------|-----------------------|------------|---------------------|--------|
| <b>Position:</b>  | chr11:86001106 | <b>Ref. allele:</b>   | G          | <b>Alt. allele:</b> | A      |
| <b>Region:</b>    | exonic         | <b>Exonic. func.:</b> | synonymous | <b>Gene ID:</b>     | PICALM |
| <b>RS number:</b> | -              | <b>Clin. sign.:</b>   | -          | -                   | -      |

---

**Results**

---

|                       |                    |             |             |               |                |              |
|-----------------------|--------------------|-------------|-------------|---------------|----------------|--------------|
| <b>Tool:</b>          | <b>PredictSNP2</b> | <b>CADD</b> | <b>DANN</b> | <b>FATHMM</b> | <b>FunSeq2</b> | <b>GWAVA</b> |
| <b>Prediction:</b>    | neutral            | neutral     | neutral     | deleterious   | neutral        | deleterious  |
| <b>Score:</b>         | -0.4577            | 12.2500     | 0.7478      | 0.9427        | 0.0000         | 0.5400       |
| <b>Exp. accuracy:</b> | 0.93               | 0.83        | 0.91        | 0.90          | 0.93           | 0.62         |

---

**External links**

[GenBank] [UCSC] [Ensemble]

---

---

**Variant:** 11 : 86001110, *T*→*A*

---

|                   |                |                       |            |                     |        |
|-------------------|----------------|-----------------------|------------|---------------------|--------|
| <b>Position:</b>  | chr11:86001110 | <b>Ref. allele:</b>   | T          | <b>Alt. allele:</b> | A      |
| <b>Region:</b>    | exonic         | <b>Exonic. func.:</b> | synonymous | <b>Gene ID:</b>     | PICALM |
| <b>RS number:</b> | -              | <b>Clin. sign.:</b>   | -          | -                   | -      |

---

**Results**

---

|                       |                    |             |             |               |                |              |
|-----------------------|--------------------|-------------|-------------|---------------|----------------|--------------|
| <b>Tool:</b>          | <b>PredictSNP2</b> | <b>CADD</b> | <b>DANN</b> | <b>FATHMM</b> | <b>FunSeq2</b> | <b>GWAVA</b> |
| <b>Prediction:</b>    | neutral            | neutral     | neutral     | neutral       | neutral        | deleterious  |
| <b>Score:</b>         | -1.0000            | 12.7800     | 0.7079      | 0.6762        | 0.0000         | 0.5600       |
| <b>Exp. accuracy:</b> | 0.96               | 0.77        | 0.93        | 0.69          | 0.93           | 0.69         |

---

**External links**

[GenBank] [UCSC] [Ensemble]

---

---

**Variant:** 11 : 86001110, T→C

---

|                   |                |                       |            |                     |        |
|-------------------|----------------|-----------------------|------------|---------------------|--------|
| <b>Position:</b>  | chr11:86001110 | <b>Ref. allele:</b>   | T          | <b>Alt. allele:</b> | C      |
| <b>Region:</b>    | exonic         | <b>Exonic. func.:</b> | synonymous | <b>Gene ID:</b>     | PICALM |
| <b>RS number:</b> | rs139625756    | <b>Clin. sign.:</b>   | -          |                     | -      |

---

**Results**

---

|                       |                    |             |             |               |                |              |
|-----------------------|--------------------|-------------|-------------|---------------|----------------|--------------|
| <b>Tool:</b>          | <b>PredictSNP2</b> | <b>CADD</b> | <b>DANN</b> | <b>FATHMM</b> | <b>FunSeq2</b> | <b>GWAVA</b> |
| <b>Prediction:</b>    | neutral            | neutral     | neutral     | neutral       | neutral        | deleterious  |
| <b>Score:</b>         | -1.0000            | 9.0250      | 0.7043      | 0.2603        | 0.0000         | 0.5600       |
| <b>Exp. accuracy:</b> | 0.96               | 0.92        | 0.94        | 0.73          | 0.93           | 0.69         |

---

**External links**

---

[dbSNP] [GenBank] [HaploReg] [RegulomeDB] [UCSC] [Ensemble]

---

---

**Variant:** 11 : 86001116, A→G

---

|                   |                |                       |            |                     |        |
|-------------------|----------------|-----------------------|------------|---------------------|--------|
| <b>Position:</b>  | chr11:86001116 | <b>Ref. allele:</b>   | A          | <b>Alt. allele:</b> | G      |
| <b>Region:</b>    | exonic         | <b>Exonic. func.:</b> | synonymous | <b>Gene ID:</b>     | PICALM |
| <b>RS number:</b> | -              | <b>Clin. sign.:</b>   | -          |                     | -      |

---

**Results**

---

|                       |                    |             |             |               |                |              |
|-----------------------|--------------------|-------------|-------------|---------------|----------------|--------------|
| <b>Tool:</b>          | <b>PredictSNP2</b> | <b>CADD</b> | <b>DANN</b> | <b>FATHMM</b> | <b>FunSeq2</b> | <b>GWAVA</b> |
| <b>Prediction:</b>    | neutral            | neutral     | neutral     | deleterious   | neutral        | deleterious  |
| <b>Score:</b>         | -0.4813            | 9.6180      | 0.7092      | 0.9293        | 0.0000         | 0.5200       |
| <b>Exp. accuracy:</b> | 0.93               | 0.91        | 0.93        | 0.82          | 0.93           | 0.58         |

---

**External links**

---

[GenBank] [UCSC] [Ensemble]

---

---

**Variant:** 11 : 86001122, T→A

---

|                   |                |                       |            |                     |        |
|-------------------|----------------|-----------------------|------------|---------------------|--------|
| <b>Position:</b>  | chr11:86001122 | <b>Ref. allele:</b>   | T          | <b>Alt. allele:</b> | A      |
| <b>Region:</b>    | exonic         | <b>Exonic. func.:</b> | synonymous | <b>Gene ID:</b>     | PICALM |
| <b>RS number:</b> | rs111469150    | <b>Clin. sign.:</b>   | -          |                     | -      |

---

**Results**

---

|                       |                    |             |             |               |                |              |
|-----------------------|--------------------|-------------|-------------|---------------|----------------|--------------|
| <b>Tool:</b>          | <b>PredictSNP2</b> | <b>CADD</b> | <b>DANN</b> | <b>FATHMM</b> | <b>FunSeq2</b> | <b>GWAVA</b> |
| <b>Prediction:</b>    | neutral            | neutral     | neutral     | deleterious   | neutral        | deleterious  |
| <b>Score:</b>         | -0.4103            | 12.9700     | 0.7187      | 0.9720        | 0.0000         | 0.5100       |
| <b>Exp. accuracy:</b> | 0.88               | 0.77        | 0.93        | 0.97          | 0.93           | 0.55         |

---

**External links**

---

[dbSNP] [GenBank] [HaploReg] [RegulomeDB] [UCSC] [Ensemble]

---

---

**Variant:** 11 : 86001149, T→C

---

|                   |                |                       |            |                     |        |
|-------------------|----------------|-----------------------|------------|---------------------|--------|
| <b>Position:</b>  | chr11:86001149 | <b>Ref. allele:</b>   | T          | <b>Alt. allele:</b> | C      |
| <b>Region:</b>    | exonic         | <b>Exonic. func.:</b> | synonymous | <b>Gene ID:</b>     | PICALM |
| <b>RS number:</b> | -              | <b>Clin. sign.:</b>   | -          |                     |        |

---

**Results**

---

|                       |                    |             |             |               |                |              |
|-----------------------|--------------------|-------------|-------------|---------------|----------------|--------------|
| <b>Tool:</b>          | <b>PredictSNP2</b> | <b>CADD</b> | <b>DANN</b> | <b>FATHMM</b> | <b>FunSeq2</b> | <b>GWAVA</b> |
| <b>Prediction:</b>    | neutral            | neutral     | neutral     | deleterious   | neutral        | deleterious  |
| <b>Score:</b>         | -0.4747            | 7.8220      | 0.7392      | 0.9288        | 0.0000         | 0.5400       |
| <b>Exp. accuracy:</b> | 0.93               | 0.91        | 0.91        | 0.82          | 0.93           | 0.62         |

---

**External links**

[GenBank] [UCSC] [Ensemble]

---

---

**Variant:** 11 : 86003413, T→C

---

|                   |                |                       |            |                     |        |
|-------------------|----------------|-----------------------|------------|---------------------|--------|
| <b>Position:</b>  | chr11:86003413 | <b>Ref. allele:</b>   | T          | <b>Alt. allele:</b> | C      |
| <b>Region:</b>    | exonic         | <b>Exonic. func.:</b> | synonymous | <b>Gene ID:</b>     | PICALM |
| <b>RS number:</b> | rs200195910    | <b>Clin. sign.:</b>   | -          |                     |        |

---

**Results**

---

|                       |                    |             |             |               |                |              |
|-----------------------|--------------------|-------------|-------------|---------------|----------------|--------------|
| <b>Tool:</b>          | <b>PredictSNP2</b> | <b>CADD</b> | <b>DANN</b> | <b>FATHMM</b> | <b>FunSeq2</b> | <b>GWAVA</b> |
| <b>Prediction:</b>    | neutral            | neutral     | neutral     | deleterious   | neutral        | ?            |
| <b>Score:</b>         | -0.5038            | 9.6710      | 0.7788      | 0.9053        | 0.0000         | 0.4900       |
| <b>Exp. accuracy:</b> | 0.93               | 0.91        | 0.90        | 0.75          | 0.93           | 0.43         |

---

**External links**

[dbSNP] [GenBank] [HaploReg] [RegulomeDB] [UCSC] [Ensemble]

---

---

**Variant:** 11 : 86003427, A→G

---

|                   |                |                       |            |                     |        |
|-------------------|----------------|-----------------------|------------|---------------------|--------|
| <b>Position:</b>  | chr11:86003427 | <b>Ref. allele:</b>   | A          | <b>Alt. allele:</b> | G      |
| <b>Region:</b>    | exonic         | <b>Exonic. func.:</b> | synonymous | <b>Gene ID:</b>     | PICALM |
| <b>RS number:</b> | -              | <b>Clin. sign.:</b>   | -          |                     |        |

---

**Results**

---

|                       |                    |             |             |               |                |              |
|-----------------------|--------------------|-------------|-------------|---------------|----------------|--------------|
| <b>Tool:</b>          | <b>PredictSNP2</b> | <b>CADD</b> | <b>DANN</b> | <b>FATHMM</b> | <b>FunSeq2</b> | <b>GWAVA</b> |
| <b>Prediction:</b>    | neutral            | neutral     | neutral     | deleterious   | neutral        | neutral      |
| <b>Score:</b>         | -0.4941            | 8.5750      | 0.7693      | 0.9135        | 0.0000         | 0.4600       |
| <b>Exp. accuracy:</b> | 0.93               | 0.92        | 0.90        | 0.77          | 0.93           | 0.54         |

---

**External links**

[GenBank] [UCSC] [Ensemble]

---

---

**Variant:** 11 : 86011033, T→C

---

|                   |                |                       |            |                     |        |
|-------------------|----------------|-----------------------|------------|---------------------|--------|
| <b>Position:</b>  | chr11:86011033 | <b>Ref. allele:</b>   | T          | <b>Alt. allele:</b> | C      |
| <b>Region:</b>    | exonic         | <b>Exonic. func.:</b> | synonymous | <b>Gene ID:</b>     | PICALM |
| <b>RS number:</b> | -              | <b>Clin. sign.:</b>   | -          |                     |        |

---

**Results**

---

|                       |                    |             |             |               |                |              |
|-----------------------|--------------------|-------------|-------------|---------------|----------------|--------------|
| <b>Tool:</b>          | <b>PredictSNP2</b> | <b>CADD</b> | <b>DANN</b> | <b>FATHMM</b> | <b>FunSeq2</b> | <b>GWAVA</b> |
| <b>Prediction:</b>    | neutral            | neutral     | neutral     | deleterious   | neutral        | deleterious  |
| <b>Score:</b>         | -0.4795            | 9.1330      | 0.7432      | 0.9265        | 0.0000         | 0.7500       |
| <b>Exp. accuracy:</b> | 0.93               | 0.92        | 0.91        | 0.82          | 0.93           | 0.70         |

---

**External links**

[GenBank] [UCSC] [Ensemble]

---

---

**Variant:** 11 : 86011036, A→C

---

|                   |                |                       |            |                     |        |
|-------------------|----------------|-----------------------|------------|---------------------|--------|
| <b>Position:</b>  | chr11:86011036 | <b>Ref. allele:</b>   | A          | <b>Alt. allele:</b> | C      |
| <b>Region:</b>    | exonic         | <b>Exonic. func.:</b> | synonymous | <b>Gene ID:</b>     | PICALM |
| <b>RS number:</b> | -              | <b>Clin. sign.:</b>   | -          |                     |        |

---

**Results**

---

|                       |                    |             |             |               |                |              |
|-----------------------|--------------------|-------------|-------------|---------------|----------------|--------------|
| <b>Tool:</b>          | <b>PredictSNP2</b> | <b>CADD</b> | <b>DANN</b> | <b>FATHMM</b> | <b>FunSeq2</b> | <b>GWAVA</b> |
| <b>Prediction:</b>    | neutral            | neutral     | neutral     | deleterious   | neutral        | deleterious  |
| <b>Score:</b>         | -0.5490            | 6.1350      | 0.8235      | 0.8672        | 0.0000         | 0.7200       |
| <b>Exp. accuracy:</b> | 0.93               | 0.93        | 0.90        | 0.60          | 0.93           | 0.70         |

---

**External links**

[GenBank] [UCSC] [Ensemble]

---

---

**Variant:** 11 : 86011129, A→G

---

|                   |                |                       |            |                     |        |
|-------------------|----------------|-----------------------|------------|---------------------|--------|
| <b>Position:</b>  | chr11:86011129 | <b>Ref. allele:</b>   | A          | <b>Alt. allele:</b> | G      |
| <b>Region:</b>    | exonic         | <b>Exonic. func.:</b> | synonymous | <b>Gene ID:</b>     | PICALM |
| <b>RS number:</b> | -              | <b>Clin. sign.:</b>   | -          |                     |        |

---

**Results**

---

|                       |                    |             |             |               |                |              |
|-----------------------|--------------------|-------------|-------------|---------------|----------------|--------------|
| <b>Tool:</b>          | <b>PredictSNP2</b> | <b>CADD</b> | <b>DANN</b> | <b>FATHMM</b> | <b>FunSeq2</b> | <b>GWAVA</b> |
| <b>Prediction:</b>    | neutral            | neutral     | neutral     | deleterious   | neutral        | deleterious  |
| <b>Score:</b>         | -0.5982            | 2.8440      | 0.5645      | 0.8185        | 0.0000         | 0.6900       |
| <b>Exp. accuracy:</b> | 0.93               | 0.95        | 0.97        | 0.57          | 0.93           | 0.70         |

---

**External links**

[GenBank] [UCSC] [Ensemble]

---

---

**Variant:** 11 : 86012300, T→C

---

|                   |                |                       |            |                     |        |
|-------------------|----------------|-----------------------|------------|---------------------|--------|
| <b>Position:</b>  | chr11:86012300 | <b>Ref. allele:</b>   | T          | <b>Alt. allele:</b> | C      |
| <b>Region:</b>    | exonic         | <b>Exonic. func.:</b> | synonymous | <b>Gene ID:</b>     | PICALM |
| <b>RS number:</b> | rs375495535    | <b>Clin. sign.:</b>   | -          |                     | -      |

---

**Results**

---

| <b>Tool:</b>          | <b>PredictSNP2</b> | <b>CADD</b> | <b>DANN</b> | <b>FATHMM</b> | <b>FunSeq2</b> | <b>GWAVA</b> |
|-----------------------|--------------------|-------------|-------------|---------------|----------------|--------------|
| <b>Prediction:</b>    | neutral            | neutral     | neutral     | deleterious   | neutral        | neutral      |
| <b>Score:</b>         | -0.4585            | 4.5400      | 0.6037      | 0.9616        | 0.0000         | 0.3900       |
| <b>Exp. accuracy:</b> | 0.93               | 0.93        | 0.96        | 0.94          | 0.93           | 0.52         |

---

**External links**

---

[dbSNP] [GenBank] [RegulomeDB] [UCSC] [Ensemble]

---

---

**Variant:** 11 : 86012339, C→A

---

|                   |                |                       |            |                     |        |
|-------------------|----------------|-----------------------|------------|---------------------|--------|
| <b>Position:</b>  | chr11:86012339 | <b>Ref. allele:</b>   | C          | <b>Alt. allele:</b> | A      |
| <b>Region:</b>    | exonic         | <b>Exonic. func.:</b> | synonymous | <b>Gene ID:</b>     | PICALM |
| <b>RS number:</b> | -              | <b>Clin. sign.:</b>   | -          |                     | -      |

---

**Results**

---

| <b>Tool:</b>          | <b>PredictSNP2</b> | <b>CADD</b> | <b>DANN</b> | <b>FATHMM</b> | <b>FunSeq2</b> | <b>GWAVA</b> |
|-----------------------|--------------------|-------------|-------------|---------------|----------------|--------------|
| <b>Prediction:</b>    | neutral            | deleterious | neutral     | deleterious   | neutral        | neutral      |
| <b>Score:</b>         | -0.1308            | 17.2300     | 0.7450      | 0.8174        | 0.0000         | 0.4400       |
| <b>Exp. accuracy:</b> | 0.88               | 0.58        | 0.91        | 0.57          | 0.93           | 0.54         |

---

**External links**

---

[GenBank] [UCSC] [Ensemble]

---

---

**Variant:** 11 : 86012351, G→A

---

|                   |                |                       |            |                     |        |
|-------------------|----------------|-----------------------|------------|---------------------|--------|
| <b>Position:</b>  | chr11:86012351 | <b>Ref. allele:</b>   | G          | <b>Alt. allele:</b> | A      |
| <b>Region:</b>    | exonic         | <b>Exonic. func.:</b> | synonymous | <b>Gene ID:</b>     | PICALM |
| <b>RS number:</b> | -              | <b>Clin. sign.:</b>   | -          |                     | -      |

---

**Results**

---

| <b>Tool:</b>          | <b>PredictSNP2</b> | <b>CADD</b> | <b>DANN</b> | <b>FATHMM</b> | <b>FunSeq2</b> | <b>GWAVA</b> |
|-----------------------|--------------------|-------------|-------------|---------------|----------------|--------------|
| <b>Prediction:</b>    | neutral            | neutral     | neutral     | deleterious   | neutral        | deleterious  |
| <b>Score:</b>         | -0.4679            | 13.8500     | 0.6356      | 0.9464        | 0.0000         | 0.5100       |
| <b>Exp. accuracy:</b> | 0.93               | 0.73        | 0.97        | 0.90          | 0.93           | 0.55         |

---

**External links**

---

[GenBank] [UCSC] [Ensemble]

---



---

**Variant:** 11 : 86012351, G→C

---

|                   |                |                       |            |                     |        |
|-------------------|----------------|-----------------------|------------|---------------------|--------|
| <b>Position:</b>  | chr11:86012351 | <b>Ref. allele:</b>   | G          | <b>Alt. allele:</b> | C      |
| <b>Region:</b>    | exonic         | <b>Exonic. func.:</b> | synonymous | <b>Gene ID:</b>     | PICALM |
| <b>RS number:</b> | -              | <b>Clin. sign.:</b>   | -          |                     |        |

**Results**

---

|                       |                    |             |             |               |                |              |
|-----------------------|--------------------|-------------|-------------|---------------|----------------|--------------|
| <b>Tool:</b>          | <b>PredictSNP2</b> | <b>CADD</b> | <b>DANN</b> | <b>FATHMM</b> | <b>FunSeq2</b> | <b>GWAVA</b> |
| <b>Prediction:</b>    | neutral            | neutral     | neutral     | deleterious   | neutral        | deleterious  |
| <b>Score:</b>         | -0.4561            | 10.9400     | 0.6702      | 0.9575        | 0.0000         | 0.5100       |
| <b>Exp. accuracy:</b> | 0.93               | 0.88        | 0.94        | 0.93          | 0.93           | 0.55         |

**External links**

[GenBank] [UCSC] [Ensemble]

---



---

**Variant:** 11 : 86012354, A→G

---

|                   |                |                       |            |                     |        |
|-------------------|----------------|-----------------------|------------|---------------------|--------|
| <b>Position:</b>  | chr11:86012354 | <b>Ref. allele:</b>   | A          | <b>Alt. allele:</b> | G      |
| <b>Region:</b>    | exonic         | <b>Exonic. func.:</b> | synonymous | <b>Gene ID:</b>     | PICALM |
| <b>RS number:</b> | rs149334225    | <b>Clin. sign.:</b>   | -          |                     |        |

**Results**

---

|                       |                    |             |             |               |                |              |
|-----------------------|--------------------|-------------|-------------|---------------|----------------|--------------|
| <b>Tool:</b>          | <b>PredictSNP2</b> | <b>CADD</b> | <b>DANN</b> | <b>FATHMM</b> | <b>FunSeq2</b> | <b>GWAVA</b> |
| <b>Prediction:</b>    | neutral            | neutral     | neutral     | deleterious   | neutral        | ?            |
| <b>Score:</b>         | -0.5438            | 12.2000     | 0.6703      | 0.8787        | 0.0000         | 0.4800       |
| <b>Exp. accuracy:</b> | 0.93               | 0.83        | 0.94        | 0.64          | 0.93           | 0.43         |

**External links**

[dbSNP] [GenBank] [HaploReg] [RegulomeDB] [UCSC] [Ensemble]

---



---

**Variant:** 11 : 86012357, A→G

---

|                   |                |                       |            |                     |        |
|-------------------|----------------|-----------------------|------------|---------------------|--------|
| <b>Position:</b>  | chr11:86012357 | <b>Ref. allele:</b>   | A          | <b>Alt. allele:</b> | G      |
| <b>Region:</b>    | exonic         | <b>Exonic. func.:</b> | synonymous | <b>Gene ID:</b>     | PICALM |
| <b>RS number:</b> | rs79317992     | <b>Clin. sign.:</b>   | -          |                     |        |

**Results**

---

|                       |                    |             |             |               |                |              |
|-----------------------|--------------------|-------------|-------------|---------------|----------------|--------------|
| <b>Tool:</b>          | <b>PredictSNP2</b> | <b>CADD</b> | <b>DANN</b> | <b>FATHMM</b> | <b>FunSeq2</b> | <b>GWAVA</b> |
| <b>Prediction:</b>    | neutral            | neutral     | neutral     | deleterious   | neutral        | neutral      |
| <b>Score:</b>         | -0.5084            | 10.0600     | 0.7306      | 0.9093        | 0.0000         | 0.4700       |
| <b>Exp. accuracy:</b> | 0.93               | 0.91        | 0.91        | 0.75          | 0.93           | 0.54         |

**External links**

[dbSNP] [GenBank] [HaploReg] [RegulomeDB] [UCSC] [Ensemble]

---

---

**Variant:** 11 : 86012363, T→C

---

|                   |                |                       |            |                     |        |
|-------------------|----------------|-----------------------|------------|---------------------|--------|
| <b>Position:</b>  | chr11:86012363 | <b>Ref. allele:</b>   | T          | <b>Alt. allele:</b> | C      |
| <b>Region:</b>    | exonic         | <b>Exonic. func.:</b> | synonymous | <b>Gene ID:</b>     | PICALM |
| <b>RS number:</b> | rs199846387    | <b>Clin. sign.:</b>   | -          |                     | -      |

---

**Results**

---

|                       |                    |             |             |               |                |              |
|-----------------------|--------------------|-------------|-------------|---------------|----------------|--------------|
| <b>Tool:</b>          | <b>PredictSNP2</b> | <b>CADD</b> | <b>DANN</b> | <b>FATHMM</b> | <b>FunSeq2</b> | <b>GWAVA</b> |
| <b>Prediction:</b>    | neutral            | neutral     | neutral     | deleterious   | neutral        | neutral      |
| <b>Score:</b>         | -0.4828            | 9.7910      | 0.6885      | 0.9264        | 0.0000         | 0.4100       |
| <b>Exp. accuracy:</b> | 0.93               | 0.91        | 0.94        | 0.82          | 0.93           | 0.56         |

---

**External links**

---

[dbSNP] [GenBank] [HaploReg] [RegulomeDB] [UCSC] [Ensemble]

---

---

**Variant:** 11 : 86014894, C→T

---

|                   |                |                       |            |                     |        |
|-------------------|----------------|-----------------------|------------|---------------------|--------|
| <b>Position:</b>  | chr11:86014894 | <b>Ref. allele:</b>   | C          | <b>Alt. allele:</b> | T      |
| <b>Region:</b>    | exonic         | <b>Exonic. func.:</b> | synonymous | <b>Gene ID:</b>     | PICALM |
| <b>RS number:</b> | rs592297       | <b>Clin. sign.:</b>   | -          |                     | -      |

---

**Results**

---

|                       |                    |             |             |               |                |              |
|-----------------------|--------------------|-------------|-------------|---------------|----------------|--------------|
| <b>Tool:</b>          | <b>PredictSNP2</b> | <b>CADD</b> | <b>DANN</b> | <b>FATHMM</b> | <b>FunSeq2</b> | <b>GWAVA</b> |
| <b>Prediction:</b>    | neutral            | neutral     | neutral     | neutral       | neutral        | neutral      |
| <b>Score:</b>         | -1.0000            | 12.9000     | 0.6510      | 0.4728        | 0.0000         | 0.3600       |
| <b>Exp. accuracy:</b> | 0.96               | 0.77        | 0.96        | 0.72          | 0.93           | 0.55         |

---

**External links**

---

[dbSNP] [GenBank] [HaploReg] [RegulomeDB] [UCSC] [Ensemble]

---

---

**Variant:** 11 : 86014923, G→A

---

|                   |                |                       |            |                     |        |
|-------------------|----------------|-----------------------|------------|---------------------|--------|
| <b>Position:</b>  | chr11:86014923 | <b>Ref. allele:</b>   | G          | <b>Alt. allele:</b> | A      |
| <b>Region:</b>    | exonic         | <b>Exonic. func.:</b> | synonymous | <b>Gene ID:</b>     | PICALM |
| <b>RS number:</b> | rs186932606    | <b>Clin. sign.:</b>   | -          |                     | -      |

---

**Results**

---

|                       |                    |             |             |               |                |              |
|-----------------------|--------------------|-------------|-------------|---------------|----------------|--------------|
| <b>Tool:</b>          | <b>PredictSNP2</b> | <b>CADD</b> | <b>DANN</b> | <b>FATHMM</b> | <b>FunSeq2</b> | <b>GWAVA</b> |
| <b>Prediction:</b>    | neutral            | neutral     | neutral     | deleterious   | neutral        | neutral      |
| <b>Score:</b>         | -0.5206            | 11.6400     | 0.6788      | 0.8999        | 0.0000         | 0.3500       |
| <b>Exp. accuracy:</b> | 0.93               | 0.83        | 0.94        | 0.71          | 0.93           | 0.54         |

---

**External links**

---

[dbSNP] [GenBank] [HaploReg] [RegulomeDB] [UCSC] [Ensemble]

---

---

**Variant:** 11 : 86014963, C→G

---

|                   |                |                       |            |                     |        |
|-------------------|----------------|-----------------------|------------|---------------------|--------|
| <b>Position:</b>  | chr11:86014963 | <b>Ref. allele:</b>   | C          | <b>Alt. allele:</b> | G      |
| <b>Region:</b>    | exonic         | <b>Exonic. func.:</b> | synonymous | <b>Gene ID:</b>     | PICALM |
| <b>RS number:</b> | -              | <b>Clin. sign.:</b>   | -          | -                   | -      |

---

**Results**

---

| <b>Tool:</b>          | <b>PredictSNP2</b> | <b>CADD</b> | <b>DANN</b> | <b>FATHMM</b> | <b>FunSeq2</b> | <b>GWAVA</b> |
|-----------------------|--------------------|-------------|-------------|---------------|----------------|--------------|
| <b>Prediction:</b>    | deleterious        | neutral     | deleterious | deleterious   | deleterious    | neutral      |
| <b>Score:</b>         | 0.5498             | 15.5400     | 0.9477      | 0.9140        | 4.0000         | 0.3700       |
| <b>Exp. accuracy:</b> | 0.93               | 0.73        | 0.87        | 0.77          | 1.00           | 0.56         |

---

**External links**

[GenBank] [UCSC] [Ensemble]

---

---

**Variant:** 11 : 86022369, T→C

---

|                   |                |                       |            |                     |        |
|-------------------|----------------|-----------------------|------------|---------------------|--------|
| <b>Position:</b>  | chr11:86022369 | <b>Ref. allele:</b>   | T          | <b>Alt. allele:</b> | C      |
| <b>Region:</b>    | exonic         | <b>Exonic. func.:</b> | synonymous | <b>Gene ID:</b>     | PICALM |
| <b>RS number:</b> | -              | <b>Clin. sign.:</b>   | -          | -                   | -      |

---

**Results**

---

| <b>Tool:</b>          | <b>PredictSNP2</b> | <b>CADD</b> | <b>DANN</b> | <b>FATHMM</b> | <b>FunSeq2</b> | <b>GWAVA</b> |
|-----------------------|--------------------|-------------|-------------|---------------|----------------|--------------|
| <b>Prediction:</b>    | neutral            | deleterious | neutral     | deleterious   | neutral        | deleterious  |
| <b>Score:</b>         | -0.0534            | 15.7700     | 0.8477      | 0.9024        | 0.0000         | 0.5100       |
| <b>Exp. accuracy:</b> | 0.88               | 0.58        | 0.90        | 0.75          | 0.93           | 0.55         |

---

**External links**

[GenBank] [UCSC] [Ensemble]

---

---

**Variant:** 11 : 86022375, C→T

---

|                   |                |                       |            |                     |        |
|-------------------|----------------|-----------------------|------------|---------------------|--------|
| <b>Position:</b>  | chr11:86022375 | <b>Ref. allele:</b>   | C          | <b>Alt. allele:</b> | T      |
| <b>Region:</b>    | exonic         | <b>Exonic. func.:</b> | synonymous | <b>Gene ID:</b>     | PICALM |
| <b>RS number:</b> | -              | <b>Clin. sign.:</b>   | -          | -                   | -      |

---

**Results**

---

| <b>Tool:</b>          | <b>PredictSNP2</b> | <b>CADD</b> | <b>DANN</b> | <b>FATHMM</b> | <b>FunSeq2</b> | <b>GWAVA</b> |
|-----------------------|--------------------|-------------|-------------|---------------|----------------|--------------|
| <b>Prediction:</b>    | neutral            | neutral     | neutral     | neutral       | neutral        | deleterious  |
| <b>Score:</b>         | -1.0000            | 13.4200     | 0.7679      | 0.6904        | 0.0000         | 0.5000       |
| <b>Exp. accuracy:</b> | 0.96               | 0.74        | 0.90        | 0.69          | 0.93           | 0.51         |

---

**External links**

[GenBank] [UCSC] [Ensemble]

---

---

**Variant:** 11 : 86022396, A→C

---

|                   |                |                       |            |                     |        |
|-------------------|----------------|-----------------------|------------|---------------------|--------|
| <b>Position:</b>  | chr11:86022396 | <b>Ref. allele:</b>   | A          | <b>Alt. allele:</b> | C      |
| <b>Region:</b>    | exonic         | <b>Exonic. func.:</b> | synonymous | <b>Gene ID:</b>     | PICALM |
| <b>RS number:</b> | -              | <b>Clin. sign.:</b>   | -          |                     |        |

---

**Results**

---

| <b>Tool:</b>          | <b>PredictSNP2</b> | <b>CADD</b> | <b>DANN</b> | <b>FATHMM</b> | <b>FunSeq2</b> | <b>GWAVA</b> |
|-----------------------|--------------------|-------------|-------------|---------------|----------------|--------------|
| <b>Prediction:</b>    | neutral            | neutral     | neutral     | neutral       | neutral        | neutral      |
| <b>Score:</b>         | -1.0000            | 5.5420      | 0.7228      | 0.7505        | 0.0000         | 0.4200       |
| <b>Exp. accuracy:</b> | 0.96               | 0.92        | 0.93        | 0.69          | 0.93           | 0.54         |

---

**External links**

[GenBank] [UCSC] [Ensemble]

---

---

**Variant:** 11 : 86022453, T→C

---

|                   |                |                       |            |                     |        |
|-------------------|----------------|-----------------------|------------|---------------------|--------|
| <b>Position:</b>  | chr11:86022453 | <b>Ref. allele:</b>   | T          | <b>Alt. allele:</b> | C      |
| <b>Region:</b>    | exonic         | <b>Exonic. func.:</b> | synonymous | <b>Gene ID:</b>     | PICALM |
| <b>RS number:</b> | -              | <b>Clin. sign.:</b>   | -          |                     |        |

---

**Results**

---

| <b>Tool:</b>          | <b>PredictSNP2</b> | <b>CADD</b> | <b>DANN</b> | <b>FATHMM</b> | <b>FunSeq2</b> | <b>GWAVA</b> |
|-----------------------|--------------------|-------------|-------------|---------------|----------------|--------------|
| <b>Prediction:</b>    | neutral            | neutral     | neutral     | neutral       | deleterious    | neutral      |
| <b>Score:</b>         | -0.3751            | 9.9620      | 0.8690      | 0.7566        | 3.0000         | 0.4200       |
| <b>Exp. accuracy:</b> | 0.88               | 0.91        | 0.90        | 0.69          | 1.00           | 0.54         |

---

**External links**

[GenBank] [UCSC] [Ensemble]

---

---

**Variant:** 11 : 86022465, A→G

---

|                   |                |                       |            |                     |        |
|-------------------|----------------|-----------------------|------------|---------------------|--------|
| <b>Position:</b>  | chr11:86022465 | <b>Ref. allele:</b>   | A          | <b>Alt. allele:</b> | G      |
| <b>Region:</b>    | exonic         | <b>Exonic. func.:</b> | synonymous | <b>Gene ID:</b>     | PICALM |
| <b>RS number:</b> | -              | <b>Clin. sign.:</b>   | -          |                     |        |

---

**Results**

---

| <b>Tool:</b>          | <b>PredictSNP2</b> | <b>CADD</b> | <b>DANN</b> | <b>FATHMM</b> | <b>FunSeq2</b> | <b>GWAVA</b> |
|-----------------------|--------------------|-------------|-------------|---------------|----------------|--------------|
| <b>Prediction:</b>    | deleterious        | neutral     | neutral     | deleterious   | deleterious    | neutral      |
| <b>Score:</b>         | 0.0917             | 8.8790      | 0.8691      | 0.9342        | 4.0000         | 0.4200       |
| <b>Exp. accuracy:</b> | 0.93               | 0.92        | 0.90        | 0.86          | 1.00           | 0.54         |

---

**External links**

[GenBank] [UCSC] [Ensemble]

---

---

**Variant:** 11 : 86022468, T→C

---

|                   |                |                       |            |                     |        |
|-------------------|----------------|-----------------------|------------|---------------------|--------|
| <b>Position:</b>  | chr11:86022468 | <b>Ref. allele:</b>   | T          | <b>Alt. allele:</b> | C      |
| <b>Region:</b>    | exonic         | <b>Exonic. func.:</b> | synonymous | <b>Gene ID:</b>     | PICALM |
| <b>RS number:</b> | -              | <b>Clin. sign.:</b>   | -          |                     |        |

---

**Results**

---

| <b>Tool:</b>          | <b>PredictSNP2</b> | <b>CADD</b> | <b>DANN</b> | <b>FATHMM</b> | <b>FunSeq2</b> | <b>GWAVA</b> |
|-----------------------|--------------------|-------------|-------------|---------------|----------------|--------------|
| <b>Prediction:</b>    | deleterious        | neutral     | deleterious | neutral       | deleterious    | neutral      |
| <b>Score:</b>         | 0.1113             | 13.3200     | 0.9639      | 0.2183        | 3.0000         | 0.3200       |
| <b>Exp. accuracy:</b> | 0.93               | 0.74        | 0.87        | 0.77          | 1.00           | 0.53         |

---

**External links**

[\[GenBank\]](#) [\[UCSC\]](#) [\[Ensemble\]](#)

---

---

**Variant:** 11 : 86026296, C→T

---

|                   |                |                       |            |                     |        |
|-------------------|----------------|-----------------------|------------|---------------------|--------|
| <b>Position:</b>  | chr11:86026296 | <b>Ref. allele:</b>   | C          | <b>Alt. allele:</b> | T      |
| <b>Region:</b>    | exonic         | <b>Exonic. func.:</b> | synonymous | <b>Gene ID:</b>     | PICALM |
| <b>RS number:</b> | rs202207283    | <b>Clin. sign.:</b>   | -          |                     |        |

---

**Results**

---

| <b>Tool:</b>          | <b>PredictSNP2</b> | <b>CADD</b> | <b>DANN</b> | <b>FATHMM</b> | <b>FunSeq2</b> | <b>GWAVA</b> |
|-----------------------|--------------------|-------------|-------------|---------------|----------------|--------------|
| <b>Prediction:</b>    | neutral            | neutral     | neutral     | neutral       | neutral        | neutral      |
| <b>Score:</b>         | -1.0000            | 14.1700     | 0.7042      | 0.7677        | 0.0000         | 0.3000       |
| <b>Exp. accuracy:</b> | 0.96               | 0.73        | 0.94        | 0.69          | 0.93           | 0.57         |

---

**External links**

[\[dbSNP\]](#) [\[GenBank\]](#) [\[HaploReg\]](#) [\[RegulomeDB\]](#) [\[UCSC\]](#) [\[Ensemble\]](#)

---

---

**Variant:** 11 : 86026323, T→C

---

|                   |                |                       |            |                     |        |
|-------------------|----------------|-----------------------|------------|---------------------|--------|
| <b>Position:</b>  | chr11:86026323 | <b>Ref. allele:</b>   | T          | <b>Alt. allele:</b> | C      |
| <b>Region:</b>    | exonic         | <b>Exonic. func.:</b> | synonymous | <b>Gene ID:</b>     | PICALM |
| <b>RS number:</b> | rs148486517    | <b>Clin. sign.:</b>   | -          |                     |        |

---

**Results**

---

| <b>Tool:</b>          | <b>PredictSNP2</b> | <b>CADD</b> | <b>DANN</b> | <b>FATHMM</b> | <b>FunSeq2</b> | <b>GWAVA</b> |
|-----------------------|--------------------|-------------|-------------|---------------|----------------|--------------|
| <b>Prediction:</b>    | neutral            | neutral     | neutral     | deleterious   | neutral        | neutral      |
| <b>Score:</b>         | -0.5799            | 9.1020      | 0.7808      | 0.8600        | 0.0000         | 0.4600       |
| <b>Exp. accuracy:</b> | 0.93               | 0.92        | 0.90        | 0.57          | 0.93           | 0.54         |

---

**External links**

[\[dbSNP\]](#) [\[GenBank\]](#) [\[HaploReg\]](#) [\[RegulomeDB\]](#) [\[UCSC\]](#) [\[Ensemble\]](#)

---

---

|                   |                    |                       |            |                     |        |  |
|-------------------|--------------------|-----------------------|------------|---------------------|--------|--|
| <b>Variant:</b>   | 11 : 86026335, C→T |                       |            |                     |        |  |
| <b>Position:</b>  | chr11:86026335     | <b>Ref. allele:</b>   | C          | <b>Alt. allele:</b> | T      |  |
| <b>Region:</b>    | exonic             | <b>Exonic. func.:</b> | synonymous | <b>Gene ID:</b>     | PICALM |  |
| <b>RS number:</b> | -                  | <b>Clin. sign.:</b>   | -          | -                   |        |  |

---

#### Results

| Tool:                 | PredictSNP2 | CADD        | DANN    | FATHMM  | FunSeq2 | GWAVA   |
|-----------------------|-------------|-------------|---------|---------|---------|---------|
| <b>Prediction:</b>    | neutral     | deleterious | neutral | neutral | neutral | neutral |
| <b>Score:</b>         | -0.6391     | 16.8800     | 0.5891  | 0.0861  | 0.0000  | 0.3600  |
| <b>Exp. accuracy:</b> | 0.95        | 0.58        | 0.97    | 0.88    | 0.93    | 0.55    |

#### External links

[GenBank] [UCSC] [Ensemble]

---



---

|                   |                    |                       |            |                     |        |  |
|-------------------|--------------------|-----------------------|------------|---------------------|--------|--|
| <b>Variant:</b>   | 11 : 86031481, C→T |                       |            |                     |        |  |
| <b>Position:</b>  | chr11:86031481     | <b>Ref. allele:</b>   | C          | <b>Alt. allele:</b> | T      |  |
| <b>Region:</b>    | exonic             | <b>Exonic. func.:</b> | synonymous | <b>Gene ID:</b>     | PICALM |  |
| <b>RS number:</b> | -                  | <b>Clin. sign.:</b>   | -          | -                   |        |  |

---

#### Results

| Tool:                 | PredictSNP2 | CADD    | DANN    | FATHMM  | FunSeq2 | GWAVA  |
|-----------------------|-------------|---------|---------|---------|---------|--------|
| <b>Prediction:</b>    | neutral     | neutral | neutral | neutral | neutral | ?      |
| <b>Score:</b>         | -1.0000     | 14.5300 | 0.7411  | 0.7343  | 0.0000  | 0.4800 |
| <b>Exp. accuracy:</b> | 0.96        | 0.73    | 0.91    | 0.69    | 0.93    | 0.43   |

#### External links

[GenBank] [UCSC] [Ensemble]

---



---

|                   |                    |                       |            |                     |        |  |
|-------------------|--------------------|-----------------------|------------|---------------------|--------|--|
| <b>Variant:</b>   | 11 : 86031523, C→G |                       |            |                     |        |  |
| <b>Position:</b>  | chr11:86031523     | <b>Ref. allele:</b>   | C          | <b>Alt. allele:</b> | G      |  |
| <b>Region:</b>    | exonic             | <b>Exonic. func.:</b> | synonymous | <b>Gene ID:</b>     | PICALM |  |
| <b>RS number:</b> | -                  | <b>Clin. sign.:</b>   | -          | -                   |        |  |

---

#### Results

| Tool:                 | PredictSNP2 | CADD    | DANN    | FATHMM      | FunSeq2 | GWAVA  |
|-----------------------|-------------|---------|---------|-------------|---------|--------|
| <b>Prediction:</b>    | neutral     | neutral | neutral | deleterious | neutral | ?      |
| <b>Score:</b>         | -0.5575     | 12.3300 | 0.6918  | 0.8695      | 0.0000  | 0.4900 |
| <b>Exp. accuracy:</b> | 0.93        | 0.83    | 0.94    | 0.60        | 0.93    | 0.43   |

#### External links

[GenBank] [UCSC] [Ensemble]

---

---

**Variant:** 11 : 86031523, C→T

---

|                   |                |                       |            |                     |        |
|-------------------|----------------|-----------------------|------------|---------------------|--------|
| <b>Position:</b>  | chr11:86031523 | <b>Ref. allele:</b>   | C          | <b>Alt. allele:</b> | T      |
| <b>Region:</b>    | exonic         | <b>Exonic. func.:</b> | synonymous | <b>Gene ID:</b>     | PICALM |
| <b>RS number:</b> | rs140266798    | <b>Clin. sign.:</b>   | -          |                     |        |

---

**Results**

---

|                       |                    |             |             |               |                |              |
|-----------------------|--------------------|-------------|-------------|---------------|----------------|--------------|
| <b>Tool:</b>          | <b>PredictSNP2</b> | <b>CADD</b> | <b>DANN</b> | <b>FATHMM</b> | <b>FunSeq2</b> | <b>GWAVA</b> |
| <b>Prediction:</b>    | neutral            | neutral     | neutral     | neutral       | neutral        | ?            |
| <b>Score:</b>         | -1.0000            | 13.6500     | 0.6654      | 0.7859        | 0.0000         | 0.4900       |
| <b>Exp. accuracy:</b> | 0.96               | 0.73        | 0.95        | 0.69          | 0.93           | 0.43         |

---

**External links**

---

[dbSNP] [GenBank] [HaploReg] [RegulomeDB] [UCSC] [Ensemble]

---

---

**Variant:** 11 : 86031559, G→A

---

|                   |                |                       |            |                     |        |
|-------------------|----------------|-----------------------|------------|---------------------|--------|
| <b>Position:</b>  | chr11:86031559 | <b>Ref. allele:</b>   | G          | <b>Alt. allele:</b> | A      |
| <b>Region:</b>    | exonic         | <b>Exonic. func.:</b> | synonymous | <b>Gene ID:</b>     | PICALM |
| <b>RS number:</b> | rs142062212    | <b>Clin. sign.:</b>   | -          |                     |        |

---

**Results**

---

|                       |                    |             |             |               |                |              |
|-----------------------|--------------------|-------------|-------------|---------------|----------------|--------------|
| <b>Tool:</b>          | <b>PredictSNP2</b> | <b>CADD</b> | <b>DANN</b> | <b>FATHMM</b> | <b>FunSeq2</b> | <b>GWAVA</b> |
| <b>Prediction:</b>    | neutral            | neutral     | neutral     | deleterious   | neutral        | deleterious  |
| <b>Score:</b>         | -0.4756            | 10.9000     | 0.6150      | 0.9470        | 0.0000         | 0.5500       |
| <b>Exp. accuracy:</b> | 0.93               | 0.88        | 0.96        | 0.91          | 0.93           | 0.66         |

---

**External links**

---

[dbSNP] [GenBank] [HaploReg] [RegulomeDB] [UCSC] [Ensemble]

---

---

**Variant:** 11 : 86031571, T→C

---

|                   |                |                       |            |                     |        |
|-------------------|----------------|-----------------------|------------|---------------------|--------|
| <b>Position:</b>  | chr11:86031571 | <b>Ref. allele:</b>   | T          | <b>Alt. allele:</b> | C      |
| <b>Region:</b>    | exonic         | <b>Exonic. func.:</b> | synonymous | <b>Gene ID:</b>     | PICALM |
| <b>RS number:</b> | rs151105998    | <b>Clin. sign.:</b>   | -          |                     |        |

---

**Results**

---

|                       |                    |             |             |               |                |              |
|-----------------------|--------------------|-------------|-------------|---------------|----------------|--------------|
| <b>Tool:</b>          | <b>PredictSNP2</b> | <b>CADD</b> | <b>DANN</b> | <b>FATHMM</b> | <b>FunSeq2</b> | <b>GWAVA</b> |
| <b>Prediction:</b>    | neutral            | neutral     | neutral     | neutral       | neutral        | deleterious  |
| <b>Score:</b>         | -1.0000            | 9.3380      | 0.6938      | 0.2327        | 0.0000         | 0.5200       |
| <b>Exp. accuracy:</b> | 0.96               | 0.91        | 0.94        | 0.73          | 0.93           | 0.58         |

---

**External links**

---

[dbSNP] [GenBank] [HaploReg] [RegulomeDB] [UCSC] [Ensemble]

---

---

**Variant:** 11 : 86031577, G→A

---

|                   |                |                       |            |                     |        |
|-------------------|----------------|-----------------------|------------|---------------------|--------|
| <b>Position:</b>  | chr11:86031577 | <b>Ref. allele:</b>   | G          | <b>Alt. allele:</b> | A      |
| <b>Region:</b>    | exonic         | <b>Exonic. func.:</b> | synonymous | <b>Gene ID:</b>     | PICALM |
| <b>RS number:</b> | -              | <b>Clin. sign.:</b>   | -          | -                   | -      |

**Results**

---

|                       |                    |             |             |               |                |              |
|-----------------------|--------------------|-------------|-------------|---------------|----------------|--------------|
| <b>Tool:</b>          | <b>PredictSNP2</b> | <b>CADD</b> | <b>DANN</b> | <b>FATHMM</b> | <b>FunSeq2</b> | <b>GWAVA</b> |
| <b>Prediction:</b>    | neutral            | neutral     | neutral     | deleterious   | neutral        | deleterious  |
| <b>Score:</b>         | -0.4845            | 11.5400     | 0.6322      | 0.9321        | 0.0000         | 0.5300       |
| <b>Exp. accuracy:</b> | 0.93               | 0.88        | 0.97        | 0.86          | 0.93           | 0.64         |

**External links**

---

[GenBank] [UCSC] [Ensemble]

---

---

**Variant:** 11 : 86068657, G→A

---

|                   |                |                       |            |                     |        |
|-------------------|----------------|-----------------------|------------|---------------------|--------|
| <b>Position:</b>  | chr11:86068657 | <b>Ref. allele:</b>   | G          | <b>Alt. allele:</b> | A      |
| <b>Region:</b>    | exonic         | <b>Exonic. func.:</b> | synonymous | <b>Gene ID:</b>     | PICALM |
| <b>RS number:</b> | -              | <b>Clin. sign.:</b>   | -          | -                   | -      |

**Results**

---

|                       |                    |             |             |               |                |              |
|-----------------------|--------------------|-------------|-------------|---------------|----------------|--------------|
| <b>Tool:</b>          | <b>PredictSNP2</b> | <b>CADD</b> | <b>DANN</b> | <b>FATHMM</b> | <b>FunSeq2</b> | <b>GWAVA</b> |
| <b>Prediction:</b>    | deleterious        | deleterious | deleterious | deleterious   | neutral        | neutral      |
| <b>Score:</b>         | 0.4592             | 17.4700     | 0.9650      | 0.7963        | 0.0000         | 0.3400       |
| <b>Exp. accuracy:</b> | 0.93               | 0.58        | 0.87        | 0.57          | 0.93           | 0.56         |

**External links**

---

[GenBank] [UCSC] [Ensemble]

---

---

**Variant:** 11 : 86068661, C→T

---

|                   |                |                       |            |                     |        |
|-------------------|----------------|-----------------------|------------|---------------------|--------|
| <b>Position:</b>  | chr11:86068661 | <b>Ref. allele:</b>   | C          | <b>Alt. allele:</b> | T      |
| <b>Region:</b>    | exonic         | <b>Exonic. func.:</b> | synonymous | <b>Gene ID:</b>     | PICALM |
| <b>RS number:</b> | rs150283404    | <b>Clin. sign.:</b>   | -          | -                   | -      |

**Results**

---

|                       |                    |             |             |               |                |              |
|-----------------------|--------------------|-------------|-------------|---------------|----------------|--------------|
| <b>Tool:</b>          | <b>PredictSNP2</b> | <b>CADD</b> | <b>DANN</b> | <b>FATHMM</b> | <b>FunSeq2</b> | <b>GWAVA</b> |
| <b>Prediction:</b>    | neutral            | deleterious | deleterious | neutral       | neutral        | neutral      |
| <b>Score:</b>         | 0.0072             | 16.6800     | 0.9680      | 0.6263        | 0.0000         | 0.3100       |
| <b>Exp. accuracy:</b> | 0.88               | 0.58        | 0.87        | 0.69          | 0.93           | 0.53         |

**External links**

---

[dbSNP] [GenBank] [HaploReg] [RegulomeDB] [UCSC] [Ensemble]

---



---

**Variant:** 11 : 86068673, C→T

---

|                   |                |                       |            |                     |        |
|-------------------|----------------|-----------------------|------------|---------------------|--------|
| <b>Position:</b>  | chr11:86068673 | <b>Ref. allele:</b>   | C          | <b>Alt. allele:</b> | T      |
| <b>Region:</b>    | exonic         | <b>Exonic. func.:</b> | synonymous | <b>Gene ID:</b>     | PICALM |
| <b>RS number:</b> | -              | <b>Clin. sign.:</b>   | -          | -                   | -      |

---

**Results**

---

|                       |                    |             |             |               |                |              |
|-----------------------|--------------------|-------------|-------------|---------------|----------------|--------------|
| <b>Tool:</b>          | <b>PredictSNP2</b> | <b>CADD</b> | <b>DANN</b> | <b>FATHMM</b> | <b>FunSeq2</b> | <b>GWAVA</b> |
| <b>Prediction:</b>    | neutral            | deleterious | deleterious | neutral       | neutral        | neutral      |
| <b>Score:</b>         | -0.0254            | 17.3200     | 0.9581      | 0.6314        | 0.0000         | 0.2700       |
| <b>Exp. accuracy:</b> | 0.88               | 0.58        | 0.87        | 0.69          | 0.93           | 0.55         |

---

**External links**

[GenBank] [UCSC] [Ensemble]

---

---

**Variant:** 11 : 86068703, T→C

---

|                   |                |                       |            |                     |        |
|-------------------|----------------|-----------------------|------------|---------------------|--------|
| <b>Position:</b>  | chr11:86068703 | <b>Ref. allele:</b>   | T          | <b>Alt. allele:</b> | C      |
| <b>Region:</b>    | exonic         | <b>Exonic. func.:</b> | synonymous | <b>Gene ID:</b>     | PICALM |
| <b>RS number:</b> | -              | <b>Clin. sign.:</b>   | -          | -                   | -      |

---

**Results**

---

|                       |                    |             |             |               |                |              |
|-----------------------|--------------------|-------------|-------------|---------------|----------------|--------------|
| <b>Tool:</b>          | <b>PredictSNP2</b> | <b>CADD</b> | <b>DANN</b> | <b>FATHMM</b> | <b>FunSeq2</b> | <b>GWAVA</b> |
| <b>Prediction:</b>    | neutral            | deleterious | neutral     | neutral       | neutral        | neutral      |
| <b>Score:</b>         | -0.5941            | 17.4900     | 0.7616      | 0.5796        | 0.0000         | 0.4700       |
| <b>Exp. accuracy:</b> | 0.93               | 0.58        | 0.90        | 0.70          | 0.93           | 0.54         |

---

**External links**

[GenBank] [UCSC] [Ensemble]

---

---

**Variant:** 11 : 86068715, T→C

---

|                   |                |                       |            |                     |        |
|-------------------|----------------|-----------------------|------------|---------------------|--------|
| <b>Position:</b>  | chr11:86068715 | <b>Ref. allele:</b>   | T          | <b>Alt. allele:</b> | C      |
| <b>Region:</b>    | exonic         | <b>Exonic. func.:</b> | synonymous | <b>Gene ID:</b>     | PICALM |
| <b>RS number:</b> | rs200624220    | <b>Clin. sign.:</b>   | -          | -                   | -      |

---

**Results**

---

|                       |                    |             |             |               |                |              |
|-----------------------|--------------------|-------------|-------------|---------------|----------------|--------------|
| <b>Tool:</b>          | <b>PredictSNP2</b> | <b>CADD</b> | <b>DANN</b> | <b>FATHMM</b> | <b>FunSeq2</b> | <b>GWAVA</b> |
| <b>Prediction:</b>    | neutral            | neutral     | neutral     | neutral       | neutral        | neutral      |
| <b>Score:</b>         | -1.0000            | 5.2440      | 0.4790      | 0.0365        | 0.0000         | 0.3800       |
| <b>Exp. accuracy:</b> | 0.96               | 0.92        | 0.97        | 0.96          | 0.93           | 0.55         |

---

**External links**

[dbSNP] [GenBank] [HaploReg] [RegulomeDB] [UCSC] [Ensemble]

---

---

|                   |                    |                       |            |                     |        |  |
|-------------------|--------------------|-----------------------|------------|---------------------|--------|--|
| <b>Variant:</b>   | 11 : 86068724, G→C |                       |            |                     |        |  |
| <b>Position:</b>  | chr11:86068724     | <b>Ref. allele:</b>   | G          | <b>Alt. allele:</b> | C      |  |
| <b>Region:</b>    | exonic             | <b>Exonic. func.:</b> | synonymous | <b>Gene ID:</b>     | PICALM |  |
| <b>RS number:</b> | -                  | <b>Clin. sign.:</b>   | -          | -                   |        |  |

---

**Results**

|                       |                    |             |             |               |                |              |
|-----------------------|--------------------|-------------|-------------|---------------|----------------|--------------|
| <b>Tool:</b>          | <b>PredictSNP2</b> | <b>CADD</b> | <b>DANN</b> | <b>FATHMM</b> | <b>FunSeq2</b> | <b>GWAVA</b> |
| <b>Prediction:</b>    | neutral            | neutral     | neutral     | deleterious   | neutral        | ?            |
| <b>Score:</b>         | -0.5947            | 11.1400     | 0.5060      | 0.8078        | 0.0000         | 0.4900       |
| <b>Exp. accuracy:</b> | 0.93               | 0.88        | 0.97        | 0.57          | 0.93           | 0.43         |

**External links**

[GenBank] [UCSC] [Ensemble]

---



---

|                   |                    |                       |            |                     |        |  |
|-------------------|--------------------|-----------------------|------------|---------------------|--------|--|
| <b>Variant:</b>   | 11 : 86068727, G→T |                       |            |                     |        |  |
| <b>Position:</b>  | chr11:86068727     | <b>Ref. allele:</b>   | G          | <b>Alt. allele:</b> | T      |  |
| <b>Region:</b>    | exonic             | <b>Exonic. func.:</b> | synonymous | <b>Gene ID:</b>     | PICALM |  |
| <b>RS number:</b> | -                  | <b>Clin. sign.:</b>   | -          | -                   |        |  |

---

**Results**

|                       |                    |             |             |               |                |              |
|-----------------------|--------------------|-------------|-------------|---------------|----------------|--------------|
| <b>Tool:</b>          | <b>PredictSNP2</b> | <b>CADD</b> | <b>DANN</b> | <b>FATHMM</b> | <b>FunSeq2</b> | <b>GWAVA</b> |
| <b>Prediction:</b>    | neutral            | neutral     | neutral     | neutral       | neutral        | neutral      |
| <b>Score:</b>         | -1.0000            | 9.3130      | 0.4774      | 0.7482        | 0.0000         | 0.4000       |
| <b>Exp. accuracy:</b> | 0.96               | 0.91        | 0.97        | 0.69          | 0.93           | 0.56         |

**External links**

[GenBank] [UCSC] [Ensemble]

---



---

|                   |                    |                       |            |                     |        |  |
|-------------------|--------------------|-----------------------|------------|---------------------|--------|--|
| <b>Variant:</b>   | 11 : 86068754, T→C |                       |            |                     |        |  |
| <b>Position:</b>  | chr11:86068754     | <b>Ref. allele:</b>   | T          | <b>Alt. allele:</b> | C      |  |
| <b>Region:</b>    | exonic             | <b>Exonic. func.:</b> | synonymous | <b>Gene ID:</b>     | PICALM |  |
| <b>RS number:</b> | -                  | <b>Clin. sign.:</b>   | -          | -                   |        |  |

---

**Results**

|                       |                    |             |             |               |                |              |
|-----------------------|--------------------|-------------|-------------|---------------|----------------|--------------|
| <b>Tool:</b>          | <b>PredictSNP2</b> | <b>CADD</b> | <b>DANN</b> | <b>FATHMM</b> | <b>FunSeq2</b> | <b>GWAVA</b> |
| <b>Prediction:</b>    | neutral            | deleterious | neutral     | neutral       | neutral        | neutral      |
| <b>Score:</b>         | -0.5989            | 16.3400     | 0.7207      | 0.4389        | 0.0000         | 0.2600       |
| <b>Exp. accuracy:</b> | 0.93               | 0.58        | 0.93        | 0.72          | 0.93           | 0.54         |

**External links**

[GenBank] [UCSC] [Ensemble]

---

---

**Variant:** 11 : 86068757, G→A

---

|                   |                |                       |            |                     |        |
|-------------------|----------------|-----------------------|------------|---------------------|--------|
| <b>Position:</b>  | chr11:86068757 | <b>Ref. allele:</b>   | G          | <b>Alt. allele:</b> | A      |
| <b>Region:</b>    | exonic         | <b>Exonic. func.:</b> | synonymous | <b>Gene ID:</b>     | PICALM |
| <b>RS number:</b> | rs367839126    | <b>Clin. sign.:</b>   | -          |                     | -      |

#### Results

---

| <b>Tool:</b>          | <b>PredictSNP2</b> | <b>CADD</b> | <b>DANN</b> | <b>FATHMM</b> | <b>FunSeq2</b> | <b>GWAVA</b> |
|-----------------------|--------------------|-------------|-------------|---------------|----------------|--------------|
| <b>Prediction:</b>    | deleterious        | deleterious | deleterious | deleterious   | neutral        | neutral      |
| <b>Score:</b>         | 0.4858             | 19.8100     | 0.9597      | 0.8890        | 0.0000         | 0.4100       |
| <b>Exp. accuracy:</b> | 0.93               | 0.69        | 0.87        | 0.68          | 0.93           | 0.56         |

#### External links

---

[\[dbSNP\]](#) [\[GenBank\]](#) [\[RegulomeDB\]](#) [\[UCSC\]](#) [\[Ensemble\]](#)

---
