# Supplementary material for: Computational analysis of functional SNPs in Alzheimer’s disease-associated endocytosis genes
Source: PeerJ. 2019 Sep 30;7:e7667. doi: 10.7717/peerj.7667 (PMC6776068; doi:10.7717/peerj.7667)
Supplement: Table S3 — S3A-S3C provided the complete prediction result of PICALM, SYNJ1 and SH3KBP1 UTR variants, respectively. S3D showed the list of variants that changed the number of motifs as compare to the respective wild type sequences. [file peerj-07-7667-s007.xlsx]

## Sheet: S3A - PICALM
Variant ID	Chr: bp	Alleles		3'	5'	Match total	Remarks
Wild type sequence signal (uORF, PAS, IRES and etc.)				10	1	11
rs775351607	11:85958829	T/C		10	1
rs540122398	11:85958831	A/G		10	1
rs796143140	11:85958832	T/C		11	1		Addition of K-BOX at position 212-219
rs771645436	11: between 85958834 & 85958835	-/C		10	1		Signal position changed
rs77739860	11:85958871	C/T		10	1
rs562736029	11:85958884	C/T		10	1
rs577895310	11:85958899	G/T		10	1
rs61284324	11:85958908	C/T		10	1		uORFs position changed
rs765450759	11:85958939	G/T		10	1
rs73504425	11:85958941	G/A		10	1
rs748905080	11:85958956	A/G		10	1
rs368786172	11:85958976	T/C		10	1
rs527501728	11:85958981	G/A		10	1
rs749948354	11:85959003	G/A		10	1
rs760111385	11:85959011	G/A		10	1
rs765719883	11:85959017	T/C		10	1
rs753228147	11:85959022	G/A		10	1
rs758724167	11:85959024	A/C		10	1
rs553550185	11:86068784	T/C		10	1
rs767913869	11:86068787	A/T		10	1
rs750617382	11:86068789	C/T		10	1
rs756382757	11:86068791	C/A		10	1
rs748085394	11:86068816-86068818	GCC/-		10	1		IRES position change
rs371146806	11:86068817	C/T		10	1
rs764740421	11:86068823	G/A		10	1
rs753954947	11:86068826	A/G		10	1
rs555221301	11:86068827	C/T		10	1
rs374507825	11:86068828	T/A		10	1
rs747911426	11:86068829	G/A		10	1
rs757696175	11:86068830	G/A		10	1
rs573785767	11:86068834	C/A		10	1
rs544282256	11:86068879	C/A		10	1
rs556208751	11:86068887	T/C		10	1
rs577680927	11:86068893	C/T		10	1
rs535144374	11:86068897	C/T		10	1

## Sheet: S3B - SYNJ1
Variant ID	Chr: bp	Alleles		3'	5'	Match total	Remarks
Wild type sequence signal (uORF, PAS, IRES and etc.)				20	0	20
rs192870374	21:32628797	C/T		20	0
rs545358697	21:32628895	A/G		20	0
rs34453709	21: between 32628932 & 32628933	-/G		20	0		IRES position changed
rs560750924	21:32628934	A/G		20	0
rs529265848	21:32628953	A/T		20	0
rs527849663	21:32628964	C/A		20	0
rs541693931	21:32629006	T/C		20	0
rs145363200	21:32629045	T/C		20	0
rs752344782	21:32629051	T/G		20	0
rs758015531	21:32629120	T/C		20	0
rs542723514	21:32629164	C/T		20	0
rs13554	21:32629186	G/A		20	0
rs757113995	21:32629205	G/T		20	0
rs531692238	21:32629238	T/C		20	0
rs570571402	21:32629255	T/C		20	0
rs761775759	21:32629264-32629265	CA/-		20	0		IRES position changed
rs75843308	21:32629275	C/G		20	0
rs533273538	21:32629315	C/T		20	0
rs551359739	21:32629317	G/A		20	0
rs539532519	21:32629328	C/T		20	0
rs755279657	21:32629328	C/-		20	0		IRES position changed
rs781120241	21:32629329	G/A		20	0
rs185449720	21:32629360	A/T		20	0
rs745810718	21:32629387	T/C		20	0
rs549189091	21:32629403	T/C		20	0
rs755041173	21:32629438	T/C		20	0
rs868710152	21:32629440	G/A		20	0
rs778886380	21:32629458	A/G		20	0
rs752848340	21:32629466	G/C		20	0
rs145554788	21:32629498	A/G		20	0
rs763226187	21:32629503	T/C		20	0
rs7279487	21:32629514	T/C		20	0
rs556155168	21:32629542	C/T		20	0
rs559133139	21:32629543	G/A		20	0
rs772398189	21:32629564	T/C		20	0
rs868422392	21:32629603	G/A		20	0
rs764351170	21:32629604	A/G		20	0
rs577529557	21:32629671	G/A		20	0
rs552130430	21:32629694	T/A		20	0
rs564203002	21:32629698-32629701	AAAG/-		20	0		IRES position changed
rs189452590	21:32629719	G/C		20	0
rs572398251	21:32629731	T/C		20	0
rs542862465	21:32629737	T/C		20	0
rs561127125	21:32629739	C/A		20	0
rs747372323	21:32629744	T/C		20	0
rs576164103	21:32629750	C/T		20	0
rs543518791	21:32629759	A/G		20	0
rs565303607	21:32629804	G/A		20	0
rs532358058	21:32629828	T/G		20	0
rs374027671	21:32629844	C/T		20	0
rs114913358	21:32629845	G/A		20	0
rs367580525	21:32629855	T/C		20	0
rs777138831	21:32629902	G/C		21	0		Addition of uORF at position 1915-1995
rs752150443	21:32629903	T/C		20	0
rs759982775	21:32629910	G/C		20	0
rs117085153	21:32629916	G/T		20	0
rs549227725	21:32629917	G/C		20	0
rs192520528	21:32629923	G/A		20	0
rs537953447	21:32629930	C/T		20	0
rs757738370	21:32629964	G/A		20	0
rs549581750	21:32630048	T/G		20	0
rs116092770	21:32630049	C/T		20	0
rs781689047	21:32630055	T/C		20	0
rs762510102	21:32630057	C/T		20	0
rs538298535	21:32630068	G/A		20	0
rs147590143	21:32630070	G/T		21	0		Addition of uORF at position 1915-1995
rs763733765	21:32630073	C/T		20	0
rs751220190	21:32630076	T/C		20	0
rs756991215	21:32630110	T/C		20	0
rs572436751	21:32630116	T/C		20	0
rs536533392	21:32630127	T/C		20	0
rs554758438	21:32630166	T/C		20	0
rs113590478	21:32630208	A/G		20	0
rs576203373	21:32630213	C/G		20	0
rs543902312	21:32630222	G/A		20	0
rs531384486	21:32630276	A/G		20	0
rs565192434	21:32630282	T/G		20	0
rs577256755	21:32630295	G/A		20	0
rs541111549	21:32630301	A/C		20	0
rs112775231	21:32630359	C/T		20	0
rs111677308	21:32630378	T/C		20	0		uORFs position changed
rs549264551	21:32630390	T/C		20	0
rs112379013	21:32630434	T/G		20	0
rs772935980	21:32630571-32630572	CT/-		20	0		IRES position changed
rs531357313	21:32630658	A/G		20	0
rs183623243	21:32630673	G/A		20	0
rs755970845	21:32630734	A/G		20	0
rs780084162	21:32630763	G/T		21	0		Addition of UNR-bs at position 1037-1047
rs748222759	21:32630792	C/A		20	0
rs571302169	21:32630866	A/G		20	0
rs532213076	21:32630869	A/T		20	0
rs772526990	21:32630886	A/-		20	0		IRES position changed
rs767649429	21: between 32630899 & 32630900	-/AA		19	0		Deletion of uORF at position 942-1037
rs549910315	21:32630929	T/A		20	0
rs151150170	21:32630939	T/A		20	0
rs765038797	21:32630945	T/G		20	0
rs750343320	21:32630951	T/C		20	0
rs368381417	21:32630964	G/T		20	0
rs766057135	21:32630970	A/G		20	0
rs188341241	21:32630979	T/C		20	0
rs754727184	21:32630987	G/A		20	0
rs780961926	21:32630988	C/A		20	0		uORFs position changed
rs112871563 (A-G)	21:32630990	T/C		20	0		uORFs position changed
rs112871563 (A-T)	21:32630990	T/A		20	0		uORFs position changed
rs757587151	21:32630991	G/T		20	0
rs374988891	21:32630993	C/T		20	0
rs143739621	21:32630994	G/A		19	0		Deletion of uORF at position 942-1037
rs772562248 (G-A)	21:32630999	C/T		20	0
rs772562248 (G-C)	21:32630999	C/G		20	0
rs747065956	21:32631004	T/C		20	0
rs536572904	21:32631012	C/A		20	0
rs776747094	21:32631021	G/T		20	0
rs745526137	21: between 32631030 & 32631031	-/A		20	0		IRES, uORFs and PAS position changed
rs762039918	21:32631036	C/T		20	0
rs764949465	21:32631038	A/G		20	0
rs778073626	21:32631042	T/C		20	0
rs763042220	21:32631043	C/T		20	0
rs111516740	21:32631044	G/A		21	0		Addition of uORF at position 887-979
rs751158459	21:32631046	G/A		20	0
rs754569751	21:32631047	A/C		20	0
rs769381981	21:32631050	G/-		20	0		IRES, uORFs and PAS position changed
rs767006933	21:32631055	T/C		20	0		uORFs position changed
rs752303366	21:32631065	C/T		20	0
rs747245690 (C-G)	21:32631067	G/C		20	0
rs747245690 (C-T)	21:32631067	G/A		20	0
rs746226206	21:32631068	G/C		20	0
rs758953009	21:32631072	C/T		20	0
rs148676465 (C-A)	21:32631073	G/T		20	0
rs148676465 (C-T)	21:32631073	G/A		20	0
rs771278245	21:32631076	C/T		20	0
rs2230767	21:32631077	G/A		20	0
rs781268061	21:32631081	G/A		20	0
rs748387512	21:32631084	G/A		20	0
rs770045164	21:32631086	G/A		20	0
rs772929914	21:32631095	G/A		20	0
rs367591704	21:32631101	G/C		20	0
rs770812915	21:32631102	G/A		20	0
rs774454924	21:32631104	G/T		20	0
rs559102258	21:32631115	C/T		20	0
rs766938091	21:32631116	G/A		20	0
rs752244587	21:32631124	A/G		20	0
rs528030561	21:32631126-32631128	AGA/-		20	0		IRES, uORFs and PAS position changed
rs760299495	21:32631127	G/C		20	0
rs763776246	21:32631139	T/C		20	0
rs150753892	21:32631140	G/C		20	0
rs3205042	21:32631142	A/C		20	0
rs577292452	21:32631144	C/T		20	0
rs780346075	21:32631147	T/C		20	0
rs752067458	21:32631166	T/C		20	0
rs755473642	21:32631167	G/A		20	0
rs781187792	21:32631179	C/T		20	0
rs139212871	21:32631187	T/C		20	0
rs769954720	21:32631192	T/G		20	0
rs76056543	21:32631194	G/A		20	0
rs371425452	21:32631201	T/G		20	0
rs375352780	21:32631203	C/T		20	0
rs770865984 (C-A)	21:32631207	G/T		20	0		uORF position changed
rs770865984 (C-T)	21:32631207	G/A		20	0
rs759611619 (C-A)	21:32631211	G/T		20	0
rs759611619 (C-G)	21:32631211	G/C		20	0
rs749616130	21:32631218-32631221	CAAG/-		20	0		IRES, uORFs and PAS position changed
rs769088554	21:32631221-32631229	GCTGACTTT/-		20	0		IRES, uORFs and PAS position changed
rs370222526 (G-C)	21:32631222	C/G		20	0
rs370222526 (G-T)	21:32631222	C/A		20	0
rs774895371	21:32631224-32631225	GA/-		20	0		IRES, uORFs and PAS position changed
rs763470511	21:32631229	T/C		20	0
rs753509065	21:32631230	G/C		20	0
rs138122167	21:32631231	A/T		20	0
rs761395590	21:32631232	C/T		20	0
rs766797595	21:32631246	C/T		20	0
rs751909522	21:32631251	T/A		20	0
rs755488018	21:32631252	C/T		20	0
rs146425050	21:32631253	C/T		20	0
rs770188528	21:32631264	C/T		20	0
rs141012977	21:32631265	G/A		20	0
rs779923204	21:32631275	C/T		20	0
rs777945782	21:32631283	C/T		20	0
rs749527882 (C-G)	21:32631284	G/C		20	0
rs749527882 (C-T)	21:32631284	G/A		20	0
rs373455294	21:32631292	A/G		20	0
rs745632049 (A-G)	21:32631301	T/C		20	0
rs745632049 (A-T)	21:32631301	T/A		20	0
rs376315642	21:32631304	A/G		20	0
rs775529283	21:32631307	C/T		20	0
rs746870998	21:32631308	T/A		20	0
rs768223697	21:32631309	G/A		20	0
rs776115769	21:32631314	T/G		20	0
rs761512345	21:32631315	G/A		20	0
rs764848521	21:32631320	T/A		20	0
rs774737539	21:32631321	C/T		20	0
rs759979917	21:32631324	A/G		20	0
rs767728958	21:32631331	C/T		20	0
rs753264526	21:32631336	A/G		20	0
rs181168631	21:32631338	C/T		20	0
rs756513267	21:32631341	T/C		20	0		uORF position changed
rs764333844	21:32631344	A/G		20	0
rs753951761	21:32631345	G/A		20	0
rs757598856	21:32631350	G/A		20	0
rs779242639	21:32631352	T/C		20	0
rs746037041	21:32631355	A/G		20	0
rs758233799	21:32631356	G/T		20	0
rs532034867	21:32631362	C/T		20	0
rs746968680	21:32631380	G/A		20	0
rs369666497	21:32631394	G/A		20	0
rs776168774	21:32631409	A/G		20	0
rs140696929	21:32631412	G/A		20	0
rs769253550	21:32631415	C/T		20	0
rs776045951	21:32631427	G/A		20	0
rs772878624	21:32631434	G/T		20	0
rs762459439	21:32631435	A/T		20	0
rs767931557	21:32631469	T/C		20	0
rs548047319	21:32631472	G/A		20	0
rs61750217	21:32631476	C/T		20	0
rs764673212	21:32631480	G/A		20	0
rs116810192	21:32631485	G/A		20	0
rs565075239	21:32631486	C/G		20	0
rs145347648	21:32631490	C/T		20	0
rs149199429	21:32631493	G/A		20	0
rs750670440	21:32631496	A/C		20	0
rs758480958	21:32631498	T/A		20	0
rs547065189	21:32631514	G/C		20	0
rs751292521	21:32631523	A/G		20	0
rs61750218	21:32631527	A/C		20	0
rs781139343	21:32631528	T/C		20	0
rs748033451	21:32631535	G/A		20	0
rs769312346	21:32631540	G/T		20	0
rs777083025	21:32631541	A/G		20	0
rs112469776 (G-A)	21:32631548	C/T		20	0
rs112469776 (G-T)	21:32631548	C/A		20	0		uORF position changed
rs565341830	21:32631549	G/A		20	0
rs760913576	21:32631555	T/C		20	0
rs769099271	21:32631570	T/G		20	0
rs777299829 (G-C)	21:32631571	C/G		20	0
rs777299829 (G-T)	21:32631571	C/A		20	0
rs765410501	21:32631572	C/T		20	0
rs373563239	21:32631573	G/A		20	0
rs763286771	21:32631575	G/A		20	0
rs113978322	21:32631582	T/C		20	0
rs751765039	21:32631591	T/C		20	0
rs754791304	21:32631593	G/A		20	0
rs780910443	21:32631597	G/A		20	0
rs752639745	21:32631599	A/G		20	0
rs756043523	21:32631605	C/T		20	0
rs777403078	21:32631616	C/T		20	0
rs761852713	21: between 32631616 & 32631617	-/G		17	0		Deletion of uORFs at position 372-437, 464-535, 644-751
rs866258846	21:32631617	A/G		20	0
rs866546581	21: between 32631617 & 32631618	-/AGTATT		20	0		IRES, uORFs and PAS position changed
rs748722673	21:32631618	A/G		20	0
rs71640263	21: between 32631618 & 32631619	-/AGTATT		20	0		IRES, uORFs and PAS position changed
rs9980589	21:32631620	A/G		20	0
rs57257560 (AATACT)	21: between 32631619 & 32631620	-/AGTATT		20	0		IRES, uORFs and PAS position changed
rs57257560 (TAATAC)	21: between 32631619 & 32631620	-/GTATTA		20	0		IRES, uORFs and PAS position changed
rs79652470	21:32631621	C/T		17	0		Deletion of uORFs at position 182-289, 372-437, 464-535, 644-751							Addition of uORF at position 205-810
rs61750219	21:32631628	T/A		20	0
rs745464855	21:32631631	C/T		20	0
rs370232202	21:32631643	C/A		20	0
rs777068962	21:32631657	T/G		20	0
rs371945882	21:32631663	G/A		20	0
rs373469623	21:32631673	G/T		20	0
rs762474522	21:32631680	G/A		20	0
rs770180376	21:32631681	G/A		20	0
rs377721268	21:32631685	C/T		20	0
rs547772465	21:32631686	G/A		20	0
rs766434591	21:32631696	A/G		20	0
rs371381727	21:32631697	T/C		20	0
rs759692814	21:32631700	C/A		20	0
rs767369716	21:32631706	C/G		20	0
rs752478437	21:32631708	T/C		20	0
rs756090874	21:32631730	T/C		20	0
rs879088012	21:32631748	G/A		20	0
rs374594692	21:32631750	C/A		20	0
rs763905079	21:32631751	A/C		20	0
rs570298309	21:32631764	G/A		20	0
rs756737216 (C-A)	21:32631784	G/T		20	0
rs756737216 (C-T)	21:32631784	G/A		20	0
rs745519601	21:32631795	T/C		20	0
rs758118019	21:32631796	T/C		20	0
rs115648918	21:32631801	C/T		20	0

## Sheet: S3C - SH3KBP1
Variant ID	Chr: bp	Alleles		3'	5'	Match total	Remarks
Wild type sequence signal (uORF, PAS, IRES and etc.)				19	2	21
rs35362947	X: between 19534070 & 19534071	-/T		19	2		IRES, uORF and PAS position changed
rs769650738	X:19534097	T/C		19	2
rs755872360	X:19534160	C/T		19	2
rs776515110	X:19534192	T/C		19	2
rs777712621	X:19534193	G/A		19	2
rs189460900	X:19534208	G/A		19	2
rs868782725	X:19534213	G/C		19	2
rs749211351	X:19534217	A/C		19	2
rs770448355	X:19534219	T/C		19	2
rs778448080	X:19534351	G/T		18	2		Deletion of GY-BOX at position 2064-2070
rs879144445	X:19534364	T/G		19	2
rs745509512	X:19534396	G/A		19	2
rs771782128	X:19534404	C/T		19	2
rs180969967	X:19534405	G/A		19	2
rs761044532	X:19534420	C/T		19	2
rs768925139	X:19534459	T/A		19	2
rs368683863	X:19534507	A/G		19	2
rs772019732	X:19534575	A/G		19	2
rs775821458	X:19534580	T/C		19	2
rs777157272	X:19534696	G/A		19	2
rs867856503	X:19534739	C/A		19	2
rs762275542	X:19534783	G/A		19	2
rs765394703	X:19534829	A/C		19	2
rs750595807	X:19534934	G/C		19	2
rs760938942	X:19534988	T/C		19	2
rs185903038	X:19535007	A/G		19	2
rs192424738	X:19535042	C/T		20	2		Addition of uORF at position 1380-1469
rs751749258	X:19535045	C/T		19	2
rs777077045	X:19535098	G/A		19	2
rs755895016	X:19535127	A/-		18	2		Deletion of uORF at position 1299-1370
rs777466449	X:19535195	G/A		19	2
rs550519518	X:19535196	C/A		19	2
rs762415271	X:19535200	C/A		19	2
rs868273389	X:19535250	C/T		19	2
rs568500113	X:19535297	G/A		19	2
rs753795205	X:19535315	G/A		19	2
rs765840537	X:19535350	A/G		19	2
rs183233446	X:19535352	C/T		19	2
rs370981395	X:19535364	C/T		19	2
rs770020846	X:19535365-19535370	GGGTAA/-		19	2		IRES, GY-box, uORFs and PAS position changed
rs745318194	X:19535365	G/A		19	2
rs771585968	X:19535371	C/T		19	2
rs151186221	X:19535435	T/C		19	2
rs746672761	X:19535455	T/C		19	2
rs186032128	X:19535462	C/T		19	2
rs200486212	X:19535465	G/A		19	2
rs776917417	X:19535493	G/C		19	2
rs750883155	X:19535644	G/C		19	2
rs762577103	X:19535686	T/C		19	2
rs748682792	X: between 19535692 & 19535693	-/T		19	2		IRES, GY-box, uORFs and PAS position changed
rs773866062	X:19535705	A/T		19	2
rs7473315	X:19535766	A/T		19	2
rs765779632	X:19535797	G/T		19	2
rs751246683	X:19535828	G/A		19	2
rs763074922	X:19535830	C/T		19	2
rs7886229	X:19535859	G/A		19	2
rs774598631	X:19535900	A/G		19	2
rs374364095	X:19535902	T/C		19	2
rs190530655	X:19535920	C/A		19	2
rs754579082	X:19535933	C/G		19	2
rs780967440	X:19535939	G/A		19	2
rs368428354	X:19535941	G/A		19	2
rs752553630	X:19535975	C/T		19	2
rs755886103	X:19536042	A/G		19	2
rs777812376	X:19536121	T/C		19	2
rs753645590	X:19536151	A/T		19	2
rs16981209	X:19536177	T/G		19	2
rs765102958	X:19536197	G/A		19	2
rs750384647	X:19536231	C/A		19	2
rs751481719	X:19536293	T/C		19	2
rs374300546	X:19536368	T/G		19	2
rs774269207	X:19536374	T/G		19	2
rs745998555	X:19536375	C/T		19	2
rs376144837	X:19536376	G/A		19	2
rs757864168	X:19536391	A/T		19	2
rs368181893	X:19536397	A/G		19	2
rs761270715	X:19536402	T/G		19	2
rs764517918	X:19536408	A/T		19	2
rs370509243	X:19536412	A/G		19	2
rs193093298	X:19887465	C/G		19	2
rs751265205	X:19887496-19887504	GCTGCTGCC/-		19	2		uORFs position changes
rs754590937	X:19887501	T/G		19	2

## Sheet: S3D - Summary
Gene	Variant ID	Chr: bp	Alleles		3'	5'	Total motif	Remarks				Additional of functional patterns
	PICALM											Deletion of functional patterns
PICALM	Wild type sequence signal (uORF, PAS, IRES and etc.)				10	1	11
3'	rs796143140	11:85958832	T/C		11	1		Addition of K-BOX at position 212-219
								Total	1
	SYNJ1
SYNJ1	Wild type sequence signal (uORF, PAS, IRES and etc.)				20	0	20
	rs777138831	21:32629902	G/C		21	0		Addition of uORF at position 1915-1995
	rs147590143	21:32630070	G/T		21	0		Addition of uORF at position 1915-1995
	rs780084162	21:32630763	G/T		21	0		Addition of UNR-bs at position 1037-1047
	rs767649429	21: between 32630899 & 32630900	-/AA		19	0		Deletion of uORF at position 942-1037
	rs143739621	21:32630994	G/A		19	0		Deletion of uORF at position 942-1037
	rs111516740	21:32631044	G/A		21	0		Addition of uORF at position 887-979
	rs761852713	21: between 32631616 & 32631617	-/G		17	0		Deletion of uORFs at position 372-437, 464-535, 644-751
	rs79652470	21:32631621	C/T		17	0		Deletion of uORFs at position 182-289, 372-437, 464-535, 644-751							Addition of uORF at position 205-810
								Total	8
	SH3KBP1
SH3KBP1	Wild type sequence signal (uORF, PAS, IRES and etc.)				19	2	21
	rs778448080	X:19534351	G/T		18	2		Deletion of GY-BOX at position 2064-2070
	rs192424738	X:19535042	C/T		20	2		Addition of uORF at position 1380-1469
	rs755895016	X:19535127	A/-		18	2		Deletion of uORF at position 1299-1370
								Total	3
