# Supplementary material for: Computational analysis of functional SNPs in Alzheimer’s disease-associated endocytosis genes
Source: PeerJ. 2019 Sep 30;7:e7667. doi: 10.7717/peerj.7667 (PMC6776068; doi:10.7717/peerj.7667)
Supplement: Table S4 — S4A-S4C provided the complete prediction result of PICALM, SYNJ1 and SH3KBP1 splice site variants, respectively. S4D showed the list of variants with score difference exceeding the defined threshold, which were predicted to break or create splice site on the respective genes. [file peerj-07-7667-s008.xlsx]

## Sheet: S4A - PICALM
CHROM	POS	ID	REF/ALT		Impact	Exon	Intron	MES WT	MES Mut	MES diff.	Diff. %
11	85959058	rs781335405	T/C		MODERATE	20/20		10.281	10.0459	0.235158	2.28731
11	85959065	rs769572334	A/-		LOW		19/19	-	-	-
11	between 85959064 & 85959065	rs773309179	-/A		LOW		19/19	-	-	-
11	85974819	rs201403951	A/C		LOW		18/19	9.18157	9.39492	-0.213346	-2.32363
11	85976624	rs768239913	A/G		MODERATE	18/20		8.54212	2.86786	5.67427	66.4269
11	85976688	rs563197514	A/G		LOW		17/19	7.80554	7.21771	0.587827	7.53089
11	85976689	rs767498454	T/C		LOW		17/19	7.80554	6.70216	1.10338	14.1359
11	85981131	rs377101068	T/C		MODERATE	17/20		10.1256	7.61415	2.51146	24.8031
11	85981236	rs769741044	T/C		LOW		16/19	4.92103	4.34843	0.572595	11.6357
11	85981745	rs781144984	T/C		MODERATE	16/20		7.97184	2.84724	5.1246	64.2838
11	85981773	rs750029324	G/T		MODERATE	16/20		11.0271	10.8806	0.146455	1.32813
11	85981864	rs765675771	C/T		LOW		15/19	-	-	-
11	85981865	rs775999130	T/C		LOW		15/19	-	-	-
11	85981869	rs763338957	T/C		LOW		15/19	9.06592	9.06592	0	0
11	85981873	rs371001564	G/A		LOW	15/20		9.06592	0.623344	8.44257	93.1243
11	85982003	rs776160429	C/G		MODERATE	15/20		6.40836	6.27259	0.135764	2.11855
11	85982007	rs763345570	A/G		LOW		14/19	6.40836	5.70981	0.698544	10.9005
11	85983858	rs745449661	T/C		LOW		14/19	-	-	-
11	85983973	rs780901532	C/G		MODERATE	14/20		6.73619	6.73619	0	0
11	85983977	rs372076701	A/G		LOW		13/19	6.73619	6.8681	-0.131905	-1.95816
11	85983980	rs189300607	A/G		LOW		13/19	6.73619	8.00874	-1.27255	-18.8912
11	85990357-85990398	rs753997090	GGAATGGCATCATCAACAGCATCTACAGTAGCAGAGAAAGGA/-		MODERATE	13/20		-	-	-
11	85990402	rs768754569	G/T		LOW		12/19	3.93398	3.93398	0	0
11	85990404	rs774449918	G/C		LOW		12/19	3.93398	3.28976	0.644219	16.3758
11	85990406	rs761712596	A/G		LOW		12/19	3.93398	5.40176	-1.46778	-37.3103
11	85990407	rs771958505	G/A		LOW		12/19	3.93398	6.04485	-2.11086	-53.6572
11	85996818	rs369285269	A/G		LOW		12/19	-	-	-
11	85996819	rs768911874	T/C		LOW		12/19	-	-	-
11	85996820	rs778947099	G/A		LOW		12/19	9.84565	8.89277	0.952873	9.67812
11	85996932	rs373199194	A/T		LOW		11/19	6.43811	6.43811	0	0
11	85996933	rs753216283	G/A		LOW		11/19	6.43811	7.025	-0.586894	-9.11594
11	85996936	rs527390423	A/T		LOW		11/19	6.43811	4.86486	1.57324	24.4364
11	85996937	rs549088547	G/A		LOW		11/19	6.43811	7.47075	-1.03264	-16.0395
11	86000785	rs762163734	A/G		LOW		10/19	8.95097	8.95097	0	0
11	86000787	rs200581450	G/A		LOW		10/19	8.95097	8.95097	0	0
11	86001166	rs778507954	A/-		LOW		9/19	-	-	-
11	86003454	rs767077090	G/A		LOW		8/19	6.35021	6.35021	0	0
11	86007536	rs753467536	A/G		LOW		8/19	10.8583	10.8583	0	0
11	86007581	rs771951801	T/-		HIGH		8/20	-	-	-
11	86007586	rs376810960	G/A		LOW		7/19	6.94253	7.11265	-0.170113	-2.4503
11	86011023	rs202001461	A/G		LOW		7/19	-	-	-
11	86012282	rs773738760	C/A		MODERATE	6/20		4.68697	6.19115	-1.50417	-32.0927
11	86012397	rs368682557	G/A		LOW		5/19	11.1635	12.3042	-1.14072	-10.2183
11	between 86012398 & 86012399	rs746992766	-/A		LOW		5/19	-	-	-
11	86014848-86014863	rs773661590	AAATTACAAAAGCATA/-		LOW		5/19	-	-	-
11	86014862	rs763386969	T/-		LOW		5/19	-	-	-
11	86014863	rs759967484	A/C		LOW		5/19	-	-	-
11	86014961	rs377463080	G/C		MODERATE	5/20		8.45676	8.10346	0.353301	4.17774
11	86014963	rs779752380	C/G		LOW	5/20		8.45676	8.45676	0	0
11	86014968	rs202168245	T/A		LOW		4/19	8.45676	8.45676	0	0
11	86014970	rs370639915	T/C		LOW		4/19	8.45676	7.59507	0.861687	10.1893
11	86014971	rs754683140	G/A		LOW		4/19	8.45676	8.45676	0	0
11	86022367	rs762002253	C/G		MODERATE	4/20		9.25272	7.22056	2.03216	21.9628
11	86022369	rs767314293	T/C		LOW	4/20		9.25272	7.13226	2.12047	22.9172
11	86022468	rs775830584	T/C		LOW	4/20		12.2156	11.2818	0.933803	7.64433
11	86022473	rs746375569	T/A		LOW		3/19	12.2156	12.2156	0	0
11	between 86022473 & 86022474	rs756823045	-/A		LOW		3/19	-	-	-
11	86022476-86022481	rs778562552	AAAAAC/-		LOW		3/19	-	-	-
11	86022476-86022487	rs745573027	AAAAACAAAAAC/-		LOW		3/19	-	-	-
11	86026370	rs748365859	G/A		LOW		2/19	8.28993	9.24984	-0.959912	-11.5793
11	between 86026371 & 86026372	rs756773030	-/A		LOW		2/19	-	-	-
11	86026372	rs753241513	A/-		LOW		2/19	-	-	-
11	86026372	rs772248561	A/G		LOW		2/19	8.28993	7.74122	0.548709	6.61899
11	86031461-86031463	rs750059325	CTG/-		LOW		2/19	-	-	-
11	between 86031618 & 86031619	rs758054404	-/A		LOW		1/19	-	-	-

## Sheet: S4B - SYNJ1
CHROM	POS	ID	REF/ALT		Impact	Exon	Intron	MES WT	MES Mut	MES diff.	Diff. %
21	32631801	rs115648918	C/T		LOW	33/33		13.6087	12.8087	0.800078	5.87915
21	32634889	rs749937654	G/A		LOW		31/32	5.34542	5.34542	0	0
21	32634891	rs758173047	G/C		LOW		31/32	5.34542	4.93019	0.415228	7.76793
21	32638903	rs61750220	C/A		LOW		31/32	10.0774	8.77984	1.2976	12.8763
21	32638905	rs373831795	T/A		LOW		31/32	10.0774	1.57349	8.50396	84.386
21	32638909	rs780568261	T/C		MODERATE	31/33		10.0774	10.0774	0	0
21	32639128	rs780768947	A/-		LOW		30/32	-	-	-
21	32639777	rs764207431	C/T		LOW	30/33		7.8116	8.1994	-0.387802	-4.96444
21	32639778	rs145937537	G/A		MODERATE	30/33		7.8116	7.8116	0	0
21	32639782	rs757413130	A/T		LOW		29/32	7.8116	7.53849	0.273106	3.49616
21	32641897	rs61752550	G/A		MODERATE	29/33		9.39397	3.08479	6.30918	67.162
21	32641897	rs61752550	G/C		MODERATE	29/33		9.39397	9.39397	0	0
21	between 32641970 & 32641971	rs748695499	-/A		LOW		28/32	-	-	-
21	32641973	rs2833929	C/A		LOW		28/32	9.83809	10.182	-0.343949	-3.4961
21	32643455	rs775339085	T/C		MODERATE	27/33		10.6192	9.50606	1.11313	10.4822
21	32643457	rs142964720	C/T		MODERATE	27/33		10.6192	8.47148	2.14771	20.2248
21	32643461	rs764059294	T/C		LOW		26/32	10.6192	9.69593	0.923262	8.69428
21	32643464	rs753676431	A/G		LOW		26/32	10.6192	9.67083	0.948365	8.93067
21	32643465	rs369584002	G/T		LOW		26/32	10.6192	8.53936	2.07983	19.5856
21	32645011	rs776721216	T/C		LOW		25/32	2.51521	1.06325	1.45197	57.7274
21	32645014	rs533064963	T/A		LOW		25/32	2.51521	3.90673	-1.39152	-55.3241
21	32645638	rs779010105	G/A		LOW		25/32	-	-	-
21	32645640	rs745914222	T/G		LOW		25/32	5.48956	5.48956	0	0
21	32645795	rs567223330	A/G		LOW		24/32	11.4748	11.1323	0.342487	2.98469
21	32646393	rs749302755	T/C		MODERATE	24/33		3.16085	2.36572	0.795129	25.1556
21	32646607	rs879885769	G/A		LOW		23/32	7.65728	7.65728	0	0
21	32650179	rs747768708	C/T		LOW		23/32	7.80624	7.80624	0	0
21	32650346	rs755765674	A/C		MODERATE	23/33		6.50599	3.82227	2.68372	41.25
21	32650351	rs376206541	C/T		LOW		22/32	6.50599	4.71135	1.79464	27.5845
21	32650352	rs183558612	G/A		LOW		22/32	6.50599	6.50599	0	0
21	32653282	rs368204504	C/T		LOW		22/32	10.2844	10.5123	-0.227901	-2.216
21	32653283	rs371765751	C/T		LOW		22/32	10.2844	10.2844	0	0
21	32653364	rs748290648	A/G		MODERATE	22/33		7.90474	7.28425	0.620495	7.84966
21	32656680	rs780616248	A/G		LOW		21/32	-	-	-
21	32656681	rs751924081	T/C		LOW		21/32	10.5671	10.0647	0.502438	4.75474
21	32656687-32656691	rs778394516	CTTAT/-		HIGH	21/33		-	-	-
21	32656689-32656694	rs747135111	TATAAG/-		MODERATE	21/33		-	-	-
21	32656907	rs775139004	A/T		LOW		20/32	5.39547	3.97943	1.41604	26.245
21	32656997	rs756427630	T/G		LOW		20/32	1.87729	1.87729	0	0
21	between 32656997 & 32656998	rs746113696	-/TA		LOW		20/32	-	-	-
21	32657124	rs761037771	C/T		LOW		19/32	7.70059	6.24855	1.45204	18.8562
21	32657712	rs538934316	C/T		LOW		19/32	5.26343	-3.34646	8.6099	163.579
21	32657870	rs145411448	A/G		LOW	19/33		9.82621	9.70877	0.117444	1.19521
21	32657875	rs767488191	A/-		LOW		18/32	-	-	-
21	32664915	rs200612458	G/C		MODERATE	18/33		7.87776	8.72697	-0.849212	-10.7799
21	32665079	rs759701632	C/T		LOW		17/32	9.15006	7.43121	1.71885	18.7851
21	32665935	rs774453854	G/A		LOW		17/32	-	-	-
21	32665944	rs746368700	A/T		MODERATE	17/33		9.25632	4.68364	4.57267	49.4006
21	32665945	rs540251156	T/A		MODERATE	17/33		9.25632	11.0134	-1.75713	-18.983
21	32665945	rs540251156	T/C		MODERATE	17/33		9.25632	9.33191	-0.0755866	-0.816595
21	32666135	rs768565296	C/T		LOW	17/33		5.07525	6.38003	-1.30478	-25.7088
21	32666430	rs758644105	G/T		LOW		16/32	8.94121	0.75918	8.18203	91.5092
21	32666577	rs763863900	C/A		LOW		15/32	9.06478	9.10396	-0.0391791	-0.432212
21	32670282	rs775522171	G/A		LOW		15/32	10.2181	8.89277	1.32533	12.9704
21	32670371	rs761358064	A/G		LOW	15/33		5.98345	5.98345	0	0
21	32673340	rs775983474	C/A		MODERATE	14/33		6.10185	5.41579	0.686067	11.2436
21	32673531	rs115989459	G/A		MODERATE	14/33		6.50736	6.92199	-0.414632	-6.37174
21	32676327	rs367718431	T/C		LOW		13/32	8.68156	4.21542	4.46614	51.444
21	32676327	rs367718431	T/G		LOW		13/32	8.68156	5.64682	3.03474	34.9561
21	32676328	rs748110438	G/T		LOW		13/32	8.68156	0.239421	8.44214	97.2422
21	32676359	rs533995497	T/C		LOW		12/32	7.34784	6.73484	0.613007	8.34268
21	32676363	rs777311008	T/C		LOW		12/32	7.34784	7.34784	0	0
21	32678647	rs756697570	C/T		MODERATE	12/33		7.63818	5.26818	2.36999	31.0282
21	32681489	rs553455718	G/A		LOW		11/32	-	-	-
21	32681491	rs376825246	T/C		LOW		11/32	7.84418	3.88506	3.95912	50.4721
21	32681651	rs844988	T/A		LOW		10/32	9.05542	9.05542	0	0
21	32684032	rs754273455	T/C		LOW		10/32	7.30369	7.30369	0	0
21	32684032	rs754273455	T/G		LOW		10/32	7.30369	8.59441	-1.29072	-17.6722
21	32684126	rs562245468	C/G		LOW		9/32	7.14242	9.15438	-2.01196	-28.1692
21	32684126	rs562245468	C/T		LOW		9/32	7.14242	7.14242	0	0
21	32684127	rs138882423	C/A		LOW		9/32	7.14242	7.14242	0	0
21	32685740	rs767288382	A/G		LOW		9/32	-	-	-
21	32685741	rs752329632	G/A		LOW		9/32	-	-	-
21	32685916-32685917	rs770809240	CT/-		HIGH	9/33		-	-	-
21	32686971	rs777999783	T/C		LOW		8/32	-	-	-
21	32687081-32687084	rs764989740	AAGA/-		LOW		7/32	-	-	-
21	32688300	rs751848732	T/C		LOW		7/32	10.7663	10.0647	0.701677	6.51732
21	32688301	rs758443410	C/T		LOW		7/32	10.7663	10.7663	0	0
21	32688306	rs565013600	C/T		MODERATE	7/33		10.7663	10.7663	0	0
21	32694217-32694220	rs751922511	CAAA/-		LOW		6/32	-	-	-
21	32694221	rs776803219	C/G		LOW		6/32	-	-	-
21	between 32694317 & 32694318	rs757866952	-/A		LOW		5/32	-	-	-
21	32694318	rs781517304	A/-		LOW		5/32	-	-	-
21	32694319	rs752261171	A/G		LOW		5/32	11.0977	11.1529	-0.0551673	-0.497106
21	32695049	rs759191433	A/G		LOW		5/32	-	-	-
21	32695050	rs187016397	T/C		LOW		5/32	-	-	-
21	32695289	rs748707134	G/A		LOW		4/32	9.75334	9.75334	0	0
21	32699830	rs776484731	G/A		LOW		4/32	-	-	-
21	between 32702051 & 32702052	rs769191151	-/A		LOW		2/32	-	-	-
21	32702052	rs775005777	A/-		LOW		2/32	-	-	-
21	32726765	rs778934357	G/A		LOW		2/32	-	-	-
21	32726921	rs771283717	C/A		LOW		1/32	7.47116	8.2327	-0.76154	-10.1931
21	32727943	rs779813770	C/A		LOW		1/32	8.70331	0.199354	8.50396	97.7094

## Sheet: S4C - SH3KBP1
CHROM	POS	ID	REF/ALT		Impact	Exon	Intron	MES WT	MES Mut	MES diff.		Diff. %
X	19536458	rs11248	T/C		MODERATE	18/18		12.0418	11.0394	1.00236		8.32399
X	19542196	rs763838645	G/-		LOW		15/17	-	-	-
X	19542199	rs750853672	A/G		LOW		15/17	10.9212	10.9212	0		0
X	19542201	rs748047037	G/A		LOW		15/17	10.9212	11.2551	-0.333933		-3.05766
X	19545914	rs750777985	T/G		LOW		15/17	-	-	-
X	19545924	rs61761898	G/C		MODERATE	15/18		9.09532	5.85038	3.24494		35.677
X	19546053	rs373724064	G/A		LOW		14/17	7.23377	7.23377	0		0
X	19550081	rs267606416	A/G		LOW	14/18		9.81569	9.81569	0		0
X	19569099	rs749448926	T/C		LOW		13/17	9.27414	9.27414	0		0
X	19569105	rs771325046	A/G		MODERATE	13/18		9.27414	7.42911	1.84503		19.8944
X	19569193	rs779805812	A/G		LOW		12/17	6.69856	6.60819	0.0903685		1.34907
X	19588807	rs773873603	A/C		LOW		11/17	-0.3541	-2.57161	2.21751		-626.238
X	19592154	rs779151218	G/A		LOW		10/17	10.148	10.148	0		0
X	19607932	rs761140020	A/G		LOW		9/17	8.62318	8.31155	0.311634		3.61391
X	19607933	rs764650280	C/T		LOW		9/17	8.62318	8.62318	0		0
X	19608050	rs759651696	A/G		LOW		8/17	12.0712	11.6159	0.455345		3.77216
X	19631859	rs777396528	T/C		LOW		8/17	8.138	4.45221	3.6858		45.2912
X	19631957	rs768675055	G/A		LOW	8/18		11.383	11.383	0		0
X	19631958	rs11552354	C/T		MODERATE	8/18		11.383	10.741	0.641945		5.63952
X	19631962	rs762277310	T/A		LOW		7/17	11.383	11.383	0		0
X	19631965	rs190819265	G/T		LOW		7/17	11.383	9.87809	1.50488		13.2205
X	19645483	rs201020808	G/C		LOW		6/17	11.2327	10.516	0.716711		6.38058
X	19683815	rs777873973	G/A		LOW		6/17	-	-	-
X	19695741	rs368604551	C/A		MODERATE	5/18		12.0002	12.0002	0		0
X	19706874	rs750049387	C/T		LOW		4/17	-	-	-
X	19706875	rs757887994	G/A		LOW		4/17	9.84565	8.89277	0.952873		9.67812
X	19706983	rs746105574	G/A		LOW	4/18		9.32036	9.32036	0		0
X	19706988	rs866339495	G/A		LOW		3/17	9.32036	9.93858	-0.618216		-6.63295
X	19746444	rs760892389	G/A		LOW		2/17	11.5087	11.5087	0		0
X	19836290	rs766232233	G/A		LOW		1/17	9.01382	9.01382	0		0

## Sheet: S4D - Summary
CHROM	POS	ID	REF/ALT		Impact	Exon	Intron	MES WT	MES Mut	MES diff.	Diff. %
PICALM
11	85976624	rs768239913	A/G		MODERATE	18/20		8.54212	2.86786	5.67427	66.4269
11	85981745	rs781144984	T/C		MODERATE	16/20		7.97184	2.84724	5.1246	64.2838
11	85981873	rs371001564	G/A		LOW	15/20		9.06592	0.623344	8.44257	93.1243
SYNJ1
21	32638905	rs373831795	T/A		LOW		31/32	10.0774	1.57349	8.50396	84.386
21	32641897	rs61752550	G/A		MODERATE	29/33		9.39397	3.08479	6.30918	67.162
21	32645014	rs533064963	T/A		LOW		25/32	2.51521	3.90673	-1.39152	-55.3241
21	32650346	rs755765674	A/C		MODERATE	23/33		6.50599	3.82227	2.68372	41.25
21	32657712	rs538934316	C/T		LOW		19/32	5.26343	-3.34646	8.6099	163.579
21	32665944	rs746368700	A/T		MODERATE	17/33		9.25632	4.68364	4.57267	49.4006
21	32666430	rs758644105	G/T		LOW		16/32	8.94121	0.75918	8.18203	91.5092
21	32676327	rs367718431	T/C		LOW		13/32	8.68156	4.21542	4.46614	51.444
21	32676327	rs367718431	T/G		LOW		13/32	8.68156	5.64682	3.03474	34.9561
21	32676328	rs748110438	G/T		LOW		13/32	8.68156	0.239421	8.44214	97.2422
21	32678647	rs756697570	C/T		MODERATE	12/33		7.63818	5.26818	2.36999	31.0282
21	32681491	rs376825246	T/C		LOW		11/32	7.84418	3.88506	3.95912	50.4721
21	32727943	rs779813770	C/A		LOW		1/32	8.70331	0.199354	8.50396	97.7094
SH3KBP1
X	19545924	rs61761898	G/C		MODERATE	15/18		9.09532	5.85038	3.24494	35.677
X	19631859	rs777396528	T/C		LOW		8/17	8.138	4.45221	3.6858	45.2912
