# Supplementary material for: Computational analysis of functional SNPs in Alzheimer’s disease-associated endocytosis genes
Source: PeerJ. 2019 Sep 30;7:e7667. doi: 10.7717/peerj.7667 (PMC6776068; doi:10.7717/peerj.7667)
Supplement: Table S8 — S8A-S8C provided the complete prediction result of PICALM, SYNJ1 and SH3KBP1 nsSNPs, respectively. S8D showed the list of variants that were predicted to be the deleterious variants in this study. [file peerj-07-7667-s012.xlsx]

## Sheet: S8A - PICALM
Gene	Variant	Chr bp	Alleles	AA	AA Coord.	SIFT score	PolyPhen	Mutation Assessor				I-Mutant	SNP&GO
								FI	FI score	VC score	VS score	DDG	PnD-SNP	PANTHER	SNP&GO
PICALM	rs778080551	11:85959051	T/A	M/L	652	0.06	0.001	low	0.99	0.88	1.1	0.3	0.138	0.09	0.054
652 aa	rs751970687	11:85959053	A/C	F/C	651	0	0.572	medium	2.135	2.48	1.79	-1.27	0.378	0.653	0.303
	rs757488828	11:85959057	G/C	Q/E	650	0.01	0.04	medium	2.045	2.48	1.61	0.13	0.233	0.206	0.146
	rs781335405	11:85959058	T/C	I/M	649	0.97	0.002	neutral	-0.605	-0.29	-0.92	-0.96	0.018	0.094	0.009
	rs556337	11:85974729	A/C	F/L	641	0.01	0.995	medium	2.645	3.09	2.2	-0.65	0.489	0.167	0.184
	rs765201736	11:85974739	G/C	P/R	638	0.04	0.439	low	1.845	2.08	1.61	-0.7	0.54	0.21	0.166
	rs184881263	11:85974761	T/C	S/G	631	0.58	0.06	low	1.59	1.79	1.39	-1.17	0.123	0.182	0.034
	rs777833191	11:85974765	T/C	I/M	629	1	0.004	neutral	-0.475	-0.26	-0.69	-2.21	0.073	0.094	0.03
	rs751287784	11:85974766	A/G	I/T	629	0.03	0.09	low	1.7	2.3	1.1	-2.89	0.532	0.246	0.171
	rs757056764	11:85974772	G/T	T/N	627	0.01	0.15	medium	2.125	2.3	1.95	-0.65	0.482	0.343	0.194
	rs745550363	11:85974778	T/C	Q/R	625	0.08	0.013	medium	2.3	2.4	2.2	-1.16	0.614	0.217	0.225
	rs779406084	11:85974781	G/A	T/M	624	0.08	0.701	medium	2.125	2.3	1.95	-0.14	0.126	0.485	0.097
	rs370710573	11:85974796	C/A/T	S/I	619	0.01	0.128	low	1.935	2.08	1.79	0.48	0.565	0.733	0.593
	rs370710573	11:85974796	C/A/T	S/N	619	0.05	0.002	low	1.935	2.08	1.79	0.01	0.409	0.626	0.416
	rs768239913	11:85976624	A/G	I/T	613	0.01	0.04	neutral	0	0	0	-1.93	0.601	0.246	0.28
	rs778388214	11:85976630	T/C	Y/C	611	0.1	0.984	medium	2.545	2.89	2.2	1.5	0.689	0.68	0.618
	rs774132879	11:85976635	T/C	I/M	609	0.81	0.001	neutral	-2.19	-2.3	-2.08	-1.01	0.103	0.094	0.033
	rs771616226	11:85976637	T/G	I/L	609	0.37	0.001	neutral	0	0	0	0.45	0.361	0.066	0.09
	rs777124408	11:85976639	A/G	M/T	608	0.4	0.103	medium	2.19	2.3	2.08	-0.88	0.692	0.201	0.268
	rs760045537	11:85976640	T/C	M/V	608	0.52	0.005	low	1.385	0.69	2.08	-0.31	0.453	0.156	0.128
	rs199991836	11:85976643	C/T	G/S	607	0.79	0.176	medium	2.34	2.48	2.2	-1.14	0.651	0.439	0.317
	rs775793328	11:85976649	G/C	P/A	605	0.12	0.844	medium	2.62	3.04	2.2	-0.66	0.488	0.204	0.128
	rs202013344	11:85976660	G/C	P/R	601	0	0.999	medium	2.645	3.09	2.2	-0.39	0.738	0.411	0.454
	rs145178573	11:85976663	T/A	Y/F	600	1	0.002	neutral	-0.205	0	-0.41	0.25	0.101	0.09	0.027
	rs145178573	11:85976663	T/C	Y/C	600	0.06	0.003	low	1.895	2.4	1.39	1.94	0.553	0.723	0.523
	rs145178573	11:85976663	T/G	Y/S	600	0.15	0.098	low	1.895	2.4	1.39	-0.81	0.505	0.497	0.418
	rs147556602	11:85976676	G/C	P/A	596	0.6	0.103	neutral	0.55	-0.29	1.39	-0.66	0.146	0.065	0.021
	rs561937456	11:85976679	G/T	P/T	595	0	0.792	medium	2.465	3.14	1.79	-1.16	0.659	0.527	0.403
	rs377101068	11:85981131	T/C	M/V	593	0.34	0.001	medium	2.15	2.35	1.95	0.69	0.521	0.156	0.139
	rs766288437	11:85981137	C/T	A/T	591	0.31	0.06	medium	1.97	1.99	1.95	-0.86	0.556	0.163	0.178
	rs764924889	11:85981144	C/G	W/C	588	0.01	0.984	medium	3.025	3.85	2.2	-0.4	0.768	0.495	0.414
	rs752421488	11:85981149	C/A	A/S	587	0.49	0.115	low	1.5	1.61	1.39	-0.42	0.308	0.144	0.112
	rs751078013	11:85981155	T/C	T/A	585	0.57	0.097	low	1.27	0.59	1.95	-0.48	0.075	0.161	0.039
	rs200817695	11:85981157	G/T	P/Q	584	0	0.999	medium	2.905	3.61	2.2	-0.7	0.661	0.28	0.284
	rs374615922	11:85981164	C/T	V/I	582	0.17	0.002	low	1.14	1.99	0.29	-0.48	0.276	0.144	0.096
	rs377370233	11:85981167	T/C	K/E	581	0	0.493	medium	2.97	3.74	2.2	0.06	0.778	0.201	0.36
	rs1043859	11:85981173	G/C	Q/E	579	0	0.507	medium	2.98	3.76	2.2	1.32	0.442	0.079	0.112
	rs1043859	11:85981173	G/T	Q/K	579	0.01	0.515	medium	2.98	3.76	2.2	0.36	0.591	0.108	0.172
	rs1043858	11:85981174	C/G	W/C	578	0	0.984	medium	3.12	4.04	2.2	-1.79	0.782	0.141	0.159
	rs755346304	11:85981177	G/C	N/K	577	0.01	0.901	medium	3.085	3.97	2.2	0.11	0.54	0.196	0.209
	rs779071423	11:85981178	T/G	N/T	577	0.02	0.826	medium	3.085	3.97	2.2	1.2	0.525	0.114	0.115
	rs369070232	11:85981206	C/A	G/C	568	0	0.759	medium	2.755	3.43	2.08	-1.34	0.771	0.544	0.44
	rs369070232	11:85981206	C/T	G/S	568	0.2	0.018	low	1.09	0.79	1.39	-1.5	0.55	0.203	0.262
	rs777897636	11:85981208	G/A	P/L	567	0.2	0.881	medium	2.92	3.64	2.2	-0.97	0.496	0.158	0.109
	rs551997403	11:85981212	G/C	Q/E	566	0.04	0.74	medium	2.865	3.53	2.2	1.08	0.403	0.155	0.143
	rs770836917	11:85981216	C/A	W/C	564	0	0.016	medium	3.045	3.89	2.2	-2.07	0.851	0.215	0.252
	rs776447091	11:85981221	T/C	N/D	563	0	0.028	low	1.39	1.39	1.39	0.14	0.231	0.104	0.057
	rs781144984	11:85981745	T/C	N/S	560	0.4	0.997	low	1.385	0.69	2.08	0.3	0.269	0.158	0.113
	rs572113237	11:85981763	C/A	G/V	554	0	0.963	medium	2.71	3.47	1.95	-1.12	0.85	0.295	0.46
	rs775411805	11:85981764	C/T	G/R	554	0	0.974	medium	2.71	3.47	1.95	-1.11	0.872	0.234	0.497
	rs768284766	11:85981767	T/C	I/V	553	0.03	0.18	low	1.635	1.32	1.95	0.12	0.539	0.131	0.119
	rs773884885	11:85981769	C/G	G/A	552	0.06	0.947	medium	2.645	3.09	2.2	-1.25	0.658	0.155	0.211
	rs370774354	11:85981770	C/G	G/R	552	0.06	0.996	medium	2.99	3.78	2.2	-1.35	0.805	0.354	0.459
	rs370774354	11:85981770	C/T	G/S	552	0.23	0.967	medium	2.645	3.09	2.2	-1.53	0.711	0.18	0.328
	rs750029324	11:85981773	G/T	L/I	551	0	0.997	medium	3.115	4.03	2.2	-1	0.617	0.184	0.207
	rs752003763	11:85981883	T/C	N/S	546	0.48	0.263	low	1.74	1.28	2.2	-0.66	0.161	0.213	0.046
	rs767918405	11:85981906	A/C	D/E	538	0.08	0.338	medium	2.295	2.64	1.95	-0.12	0.114	0.142	0.018
	rs750460828	11:85981915	T/G	L/F	535	0.25	0.987	medium	2.73	3.26	2.2	-0.23	0.165	0.325	0.027
	rs775978211	11:85981921	G/C	S/R	533	0.02	0.017	low	1.15	2.3	0	-0.67	0.358	0.1	0.035
	rs756272821	11:85981922	C/T	S/N	533	0.3	0	neutral	-0.55	0.51	-1.61	-1.01	0.137	0.059	0.017
	rs570358338	11:85981923	T/C	S/G	533	1	0	neutral	-1.045	-0.99	-1.1	-1.6	0.064	0.109	0.007
	rs760429933	11:85981932	G/A	L/F	530	0.67	0.089	low	1.15	1.61	0.69	-0.07	0.18	0.267	0.033
	rs201601250	11:85981934	T/A	K/I	529	0.33	0.011	low	1.445	1.1	1.79	0.21	0.103	0.225	0.028
	rs201601250	11:85981934	T/C	K/R	529	0.59	0.098	low	1.79	1.79	1.79	-0.45	0.071	0.152	0.017
	rs771561901	11:85981948	G/T	N/K	524	0.33	0.017	neutral	0.14	-0.41	0.69	-1.05	0.151	0.067	0.034
	rs772866359	11:85981959	G/C	Q/E	521	0.32	0.017	low	1.7	2.01	1.39	0.85	0.178	0.156	0.063
	rs770461695	11:85981991	A/G	L/P	510	0.05	0.709	medium	2.71	3.47	1.95	-2.43	0.825	0.103	0.217
	rs776160429	11:85982003	C/G	G/A	506	0.61	0.003	neutral	0.59	1.18	0	-1.76	0.37	0.072	0.098
	rs35013406	11:85983880	A/G	I/T	501	0.47	0.001	neutral	0.55	0	1.1	-2.93	0.36	0.12	0.115
	rs768978248	11:85983887	T/C	N/D	499	0.37	0.044	low	1.15	0.69	1.61	-0.91	0.298	0.092	0.073
	rs774935932	11:85983898	T/C	N/S	495	0.55	0.146	low	1.625	1.05	2.2	-1.75	0.43	0.232	0.182
	rs762032161	11:85983911	A/T	S/T	491	0.09	0.93	medium	2.67	3.14	2.2	-0.69	0.373	0.274	0.125
	rs772591866	11:85983914	C/T	E/K	490	0.03	0.097	medium	2.11	2.83	1.39	-1.89	0.609	0.167	0.184
	rs773749678	11:85983931	C/G	G/A	484	0.89	0.003	neutral	0.795	-0.2	1.79	-0.88	0.163	0.153	0.057
	rs773749678	11:85983931	C/T	G/D	484	0.59	0.089	medium	1.995	2.2	1.79	-0.81	0.51	0.166	0.158
	rs374608856	11:85983935	C/A	A/S	483	1	0.001	neutral	0.245	-0.61	1.1	-0.52	0.148	0.167	0.06
	rs753797673	11:85983943	T/C	H/R	480	0.35	0.017	neutral	0.55	1.1	0	-0.07	0.276	0.117	0.086
	rs367635542	11:85983944	G/A	H/Y	480	1	0.044	neutral	0.55	1.1	0	0.97	0.252	0.256	0.088
	rs371321082	11:85983947	G/A	P/S	479	0.24	0.004	low	1.12	0.85	1.39	-2.32	0.416	0.29	0.177
	rs374401818	11:85983949	T/C	Q/R	478	0.14	0.11	medium	2.19	2.3	2.08	-0.6	0.473	0.122	0.125
	rs752710899	11:85983950	G/T	Q/K	478	0.26	0.04	medium	2.19	2.3	2.08	0.14	0.533	0.12	0.152
	rs569248629	11:85983955	A/G	V/A	476	0.71	0.001	neutral	-0.045	-0.09	0	-2.45	0.095	0.094	0.025
	rs867843426	11:85983956	C/A	V/F	476	0.12	0.123	low	1.895	2.4	1.39	-2.96	0.436	0.242	0.096
	rs756897371	11:85983965	G/A	P/S	473	0.3	0.004	low	0.965	1.01	0.92	-1.19	0.253	0.242	0.103
	rs367940264	11:85983969	G/T	F/L	471	0.33	0.097	medium	2.585	3.09	2.08	-0.89	0.3	0.148	0.136
	rs780901532	11:85983973	C/G	G/A	470	0.18	0.049	medium	2.785	3.37	2.2	-0.1	0.177	0.158	0.058
	rs748862465	11:85990258	A/G	M/T	467	0.64	0.006	neutral	-0.805	-0.22	-1.39	-0.3	0.38	0.065	0.123
	rs117411388	11:85990264	T/C	H/R	465	0.45	0.053	low	1.15	1.61	0.69	-0.96	0.376	0.057	0.071
	rs778441424	11:85990276	C/A	R/M	461	0.1	0.453	low	1.32	1.95	0.69	-0.88	0.299	0.244	0.064
	rs771454555	11:85990280	T/C	T/A	460	0.67	0	neutral	-0.345	0	-0.69	-0.79	0.14	0.066	0.042
	rs776901005	11:85990283	T/C	T/A	459	0.95	0	neutral	0.69	0.69	0.69	-0.81	0.073	0.074	0.026
	rs769969444	11:85990289	T/C	T/A	457	0.6	0	neutral	-0.49	-0.29	-0.69	-1.18	0.113	0.069	0.029
	rs184756078	11:85990297	T/C	D/G	454	0.35	0.024	neutral	0.345	0.69	0	-2.37	0.623	0.156	0.091
	rs763024546	11:85990307	T/C	I/V	451	1	0	neutral	-0.55	-1.1	0	-1.19	0.034	0.09	0.014
	rs763024546	11:85990307	T/G	I/L	451	0.7	0.001	neutral	-0.345	-0.69	0	-0.61	0.107	0.088	0.035
	rs774294297	11:85990327	C/G	S/T	444	0.42	0.004	neutral	0	0	0	-1.32	0.112	0.074	0.012
	rs761552843	11:85990336	G/A	T/I	441	0.15	0.143	neutral	0	0	0	-0.78	0.146	0.174	0.035
	rs750230972	11:85990340	G/A	L/F	440	0.1	0.08	neutral	0.345	0.69	0	-0.74	0.22		0.032
	rs189624073	11:85990358	G/C	P/A	434	0.1	0.265	low	1.61	1.61	1.61	-2.64	0.296		0.043
	rs765954837	11:85990360	A/G	I/T	433	0.36	0.001	low	1.39	1.39	1.39	-3.1	0.34		0.091
	rs561655469	11:85990365	A/C	D/E	431	0.39	0.002	neutral	0.455	0.22	0.69	-0.64	0.265		0.086
	rs199506085	11:85990369	T/A	D/V	430	0.17	0.084	low	1.39	1.39	1.39	-0.44	0.41		0.098
	rs199506085	11:85990369	T/C	D/G	430	0.29	0.057	low	1.39	1.39	1.39	-1.43	0.541		0.156
	rs781608320	11:85990387	G/A	A/V	424	0.45	0.01	low	0.895	1.1	0.69	-0.55	0.226		0.073
	rs746286651	11:85990394	A/C	F/V	422	0.09	0.049	low	1.525	1.95	1.1	-1.95	0.635	0.055	0.131
	rs746286651	11:85990394	A/G	F/L	422	0.27	0.049	medium	2.215	2.64	1.79	-1.09	0.365	0.066	0.097
	rs748240495	11:85996829	C/T	G/R	419	0	0.824	medium	2.67	3.14	2.2	-1.69	0.672	0.415	0.4
	rs202189303	11:85996846	T/C	Q/R	413	0.52	0.053	low	1.1	1.1	1.1	-0.25	0.249	0.187	0.117
	rs34013602	11:85996853	C/G	A/P	411	0.2	0.102	low	0.895	1.79	0	-0.46	0.199	0.356	0.131
	rs760482423	11:85996856	T/C	T/A	410	0.76	0.001	neutral	0.525	-0.34	1.39	-0.58	0.085	0.123	0.033
	rs770822981	11:85996859	A/T	S/T	409	0.47	0.003	low	1.24	0.69	1.79	-0.05	0.251	0.188	0.062
	rs776617402	11:85996862	T/C	M/V	408	0.45	0	neutral	0.69	0.69	0.69	0.32	0.116	0.135	0.042
	rs529120093	11:85996885	G/C	T/S	400	0.76	0.002	low	1.245	1.39	1.1	-1.18	0.089	0.207	0.035
	rs752190439	11:85996889	G/A	P/S	399	0.05	0.117	low	1.53	2.08	0.98	-1.72	0.546	0.288	0.215
	rs372958249	11:85996890	C/A	Q/H	398	0	0.928	low	1.935	2.48	1.39	-1.32	0.514	0.367	0.154
	rs376190197	11:85996904	G/C	L/V	394	0.06	0.08	medium	2.38	2.56	2.2	-0.05	0.241	0.169	0.037
	rs370829648	11:85996909	T/C	D/G	392	0	0.597	medium	2.85	3.3	2.4	-0.74	0.6	0.337	0.089
	rs754255547	11:85996912	T/C	N/S	391	1	0.004	neutral	-0.625	-1.1	-0.15	-0.68	0.021	0.121	0.006
	rs755185214	11:85996915	G/C	P/R	390	0.05	0.104	low	1.04	0.69	1.39	-0.69	0.081	0.169	0.016
	rs779110334	11:85996916	G/A	P/S	390	1	0.006	neutral	-0.16	-1.01	0.69	-1.61	0.02	0.133	0.009
	rs12222608	11:86000649	G/A	S/F	383	0.01	0.006	low	1.61	1.61	1.61	-1.41	0.174	0.465	0.067
	rs267603226	11:86000652	G/A	S/F	382	0.05	0.713	low	1.67	1.95	1.39	-1.31	0.218	0.205	0.025
	rs768413521	11:86000658	G/A	P/L	380	0	0.003	medium	2.595	2.89	2.3	-1.32	0.235	0.442	0.125
	rs766811814	11:86000677	T/C	I/V	374	1	0.094	low	1.385	0.37	2.4	-1.2	0.045	0.113	0.014
	rs760077340	11:86000682	G/A	P/L	372	0.04	0.19	medium	2.535	2.77	2.3	-0.72	0.561	0.23	0.166
	rs138200809	11:86000683	G/A	P/S	372	0.08	0.063	medium	1.985	1.67	2.3	-1.63	0.422	0.196	0.118
	rs763085613	11:86000685	G/A	A/V	371	0.11	0.002	low	0.93	1.01	0.85	-0.73	0.239	0.167	0.058
	rs764385368	11:86000686	C/G	A/P	371	0.18	0.221	medium	2.175	2.4	1.95	-1.46	0.632	0.39	0.35
	rs757432891	11:86000689	T/G	T/P	370	0.02	0.772	medium	2.515	2.83	2.2	-1.66	0.78	0.421	0.385
	rs779701009	11:86000706	G/A	S/L	364	0.06	0.004	low	1.15	1.61	0.69	1.66	0.293	0.463	0.234
	rs768125947	11:86000721	G/A	S/F	359	0	0.921	medium	2.89	3.3	2.48	-0.68	0.487	0.695	0.308
	rs778639396	11:86000725	C/G	A/P	358	0.18	0.005	medium	2.125	2.64	1.61	0.07	0.545	0.581	0.348
	rs77725637	11:86000728	C/G	A/P	357	0.26	0.391	low	0.915	0.22	1.61	-0.22	0.266	0.629	0.242
	rs747618782	11:86000730	G/A	T/I	356	0.11	0.922	medium	2.83	3.18	2.48	0.13	0.315	0.416	0.091
	rs771541110	11:86000739	G/T	S/Y	353	0.07	0.002	low	1.04	1.39	0.69	-0.09	0.23	0.569	0.119
	rs772758508	11:86000750	T/A	K/N	349	0.44	0.005	neutral	0.39	0.56	0.22	0.17	0.137	0.117	0.021
	rs760024067	11:86000757	G/C	A/G	347	0.42	0.003	neutral	0.125	-0.85	1.1	-0.61	0.08	0.312	0.025
	rs367815248	11:86000766	T/C	K/R	344	0.32	0.41	low	1.7	1	2.4	0.47	0.111	0.252	0.023
	rs763392225	11:86000772	C/T	R/H	342	0.04	0.962	medium	2.87	3.26	2.48	-0.63	0.283	0.458	0.081
	rs764175684	11:86000773	G/A	R/C	342	0	0.962	medium	2.87	3.26	2.48	-0.18	0.367	0.768	0.158
	rs372267972	11:86000774	C/A	Q/H	341	0	0.764	medium	2.645	3.09	2.2	-0.95	0.197	0.55	0.072
	rs754921696	11:86001045	T/C	K/R	336	0.39	0.006	low	1.545	1.39	1.7	-0.22	0.049	0.105	0.005
	rs763507350	11:86001055	C/T	A/T	333	0.06	0.033	medium	2.745	3.09	2.4	-1.3	0.19	0.39	0.06
	rs756826186	11:86001088	T/A	R/W	322	0	0.765	medium	2.595	2.71	2.48	-0.27	0.296	0.778	0.167
	rs772362148	11:86001120	C/T	S/N	311	0.53	0.002	neutral	-0.55	-0.41	-0.69	-1.07	0.103	0.227	0.028
	rs773590037	11:86001129	G/C	S/C	308	0	0.345	medium	2.71	2.94	2.48	-1.07	0.35	0.58	0.097
	rs760630468	11:86001144	G/T	S/Y	303	0	0.14	medium	2.87	3.26	2.48	-0.6	0.337	0.633	0.18
	rs776634631	11:86001154	T/C	T/A	300	0.12	0.002	neutral	0.755	0.41	1.1	-1.58	0.096		0.034
	rs776707279	11:86003387	T/C	K/R	291	0.07	0.034	medium	2.925	3.37	2.48	-0.72	0.134	0.261	0.033
	rs759551605	11:86003396	T/C	K/R	288	0.22	0.08	low	1.935	1.39	2.48	-0.76	0.122	0.2	0.022
	rs769675159	11:86003400	C/T	G/R	287	0	0.709	medium	2.925	3.37	2.48	-1.99	0.554	0.911	0.517
	rs775440772	11:86003405	A/G	L/S	285	0	0.914	low	1.495	2.3	0.69	-1.48	0.488	0.868	0.477
	rs780415400	11:86003433	C/T	D/N	276	0	0.222	low	1.32	1.95	0.69	-0.7	0.079	0.371	0.038
	rs553760919	11:86003444	C/T	S/N	272	0.05	0.044	medium	2.365	2.94	1.79	-0.44	0.187	0.558	0.177
	rs761518680	11:86003448	G/A	P/S	271	0.01	1	medium	1.96	2.13	1.79	-1.5	0.254	0.834	0.352
	rs758909122	11:86007565	C/T	G/S	262	0.01	0.957	low	1.82	2.25	1.39	-1.98	0.375	0.719	0.378
	rs778156709	11:86007568	T/C	R/G	261	0	0.75	low	1.17	2.34	0	-0.49	0.599	0.637	0.468
	rs751906075	11:86007569	G/T	D/E	260	0.01	0.662	medium	2.01	2.23	1.79	-0.55	0.45	0.605	0.408
	rs749316213	11:86011044	G/T	L/I	251	0	0.989	medium	2.96	4.13	1.79	-1	0.612	0.444	0.273
	rs755044261	11:86011070	G/C	T/S	242	0.09	0.427	low	1.385	1.67	1.1	-0.38	0.33	0.355	0.184
	rs779087220	11:86011087	G/C	I/M	236	0.05	0.982	medium	2.49	3.37	1.61	0.17	0.709	0.401	0.261
	rs748011602	11:86011091	T/A	D/V	235	0	0.931	medium	2.05	3	1.1	-0.55	0.548	0.833	0.507
	rs772116244	11:86011121	A/G	M/T	225	0	0.998	medium	2.635	3.48	1.79	-0.37	0.769	0.781	0.69
	rs565308397	11:86011123	A/T	D/E	224	0.34	0.01	neutral	-0.285	-1.26	0.69	0.08	0.091	0.497	0.089
	rs746814227	11:86011124	T/A	D/V	224	0	0.875	medium	2.05	2.71	1.39	-0.66	0.593	0.833	0.534
	rs770659547	11:86011125	C/G	D/H	224	0	0.954	medium	2.05	2.71	1.39	0.06	0.437	0.82	0.285
	rs759277181	11:86011131	A/G	Y/H	222	0.02	1	medium	2.84	3.89	1.79	-1.73	0.579	0.724	0.364
	rs773738760	11:86012282	C/A	L/F	219	0.02	0.964	medium	3.02	4.25	1.79	0.11	0.579	0.78	0.446
	rs754259329	11:86012341	G/T	L/M	200	0.02	0.955	medium	2.92	4.23	1.61	-1.24	0.72	0.758	0.405
	rs369897180	11:86012345	C/T	M/I	198	0.08	0.202	low	1.39	1.39	1.39	-0.91	0.586	0.096	0.164
	rs765510695	11:86012346	A/G	M/T	198	0.02	0.862	low	1.18	1.67	0.69	-1.39	0.569	0.474	0.483
	rs778042984	11:86012355	G/A	A/V	195	0.01	0.032	low	1.04	2.08	0	-0.01	0.344	0.193	0.087
	rs781133632	11:86012365	C/T	V/I	192	0	0.006	neutral	0.79	-0.21	1.79	-1.07	0.2	0.306	0.1
	rs202022146	11:86012368	C/A	G/W	191	0	0.998	medium	2.56	3.33	1.79	-1.22	0.693	0.973	0.407
	rs74727972	11:86012377	G/T	L/I	188	0	0.96	low	1.63	1.47	1.79	-1.81	0.396	0.554	0.299
	rs745676394	11:86012381	A/T	N/K	186	0.01	0.851	low	1.625	1.64	1.61	-1.13	0.528	0.373	0.251
	rs144544770	11:86012382	T/C	N/S	186	0.03	0.077	low	1.83	2.05	1.61	-0.96	0.381	0.115	0.066
	rs765338634	11:86014880	A/G	L/P	179	0	0.989	medium	2.965	4.14	1.79	-2.29	0.838	0.913	0.692
	rs567632388	11:86014884	G/A	L/F	178	0	0.985	medium	3.035	4.28	1.79	-0.07	0.579	0.78	0.475
	rs764258400	11:86014901	T/C	Q/R	172	0	0.579	medium	2.995	4.2	1.79	-0.61	0.782	0.703	0.689
	rs751759837	11:86014905	T/C	I/V	171	0.06	0.171	neutral	0.2	-1.21	1.61	-0.57	0.096	0.192	0.037
	rs757198200	11:86014914	C/T	V/I	168	0.1	0.021	neutral	0.49	0.98	0	-0.08	0.055	0.093	0.011
	rs746285694	11:86014940	A/G	M/T	159	0	0.764	medium	2.52	3.43	1.61	0.38	0.644	0.781	0.712
	rs373046489	11:86014941	T/C	M/V	159	0.01	0.05	medium	2.175	2.74	1.61	0.03	0.602	0.606	0.596
	rs12800974	11:86014944	T/C	T/A	158	0	0.032	medium	2.14	2.67	1.61	-1.24	0.363	0.299	0.192
	rs12800974	11:86014944	T/G	T/P	158	0	0.838	medium	2.49	3.37	1.61	-2.71	0.743	0.619	0.489
	rs377463080	11:86014961	G/C	A/G	152	0.09	0.004	neutral	0.345	0	0.69	-2.55	0.335	0.306	0.141
	rs762002253	11:86022367	C/G	G/A	151	0.01	0.712	low	1.74	1.69	1.79	-1.66	0.57	0.773	0.456
	rs756054547	11:86022380	T/C	K/E	147	0	0.767	low	1.905	2.2	1.61	-0.51	0.721	0.597	0.757
	rs145115354	11:86022389	C/T	D/N	144	0	1	medium	3.04	4.29	1.79	-1.57	0.909	0.82	0.784
	rs754558342	11:86022403	C/T	R/K	139	0	0.42	medium	2.125	2.46	1.79	-2.04	0.77	0.579	0.542
	rs531548903	11:86022410	A/C	S/A	137	0.07	0.223	neutral	0.615	-0.56	1.79	-0.71	0.179	0.271	0.074
	rs747618387	11:86022434	T/C	R/G	129	0	0.821	medium	2.165	2.94	1.39	-3.04	0.752	0.567	0.553
	rs200363412	11:86022444	C/G	R/S	125	0	0.45	medium	2.85	3.91	1.79	-3.31	0.86	0.81	0.828
	rs780443419	11:86026315	A/G	F/S	109	0	0.994	medium	2.29	2.79	1.79	-2.81	0.869	0.854	0.794
	rs750147583	11:86026324	A/G	L/S	106	0	0.999	medium	2.82	3.85	1.79	-1.93	0.714	0.866	0.664
	rs779466539	11:86026337	T/C	T/A	102	0.06	0.02	low	1.67	1.95	1.39	-1.34	0.288	0.312	0.153
	rs371017558	11:86031490	A/C	H/Q	84	0.05	0.524	low	1.81	1.83	1.79	-0.73	0.684	0.365	0.422
	rs780886080	11:86031498	T/C	T/A	82	0.05	0.519	low	1.385	1.85	0.92	-1.63	0.562	0.301	0.332
	rs754371476	11:86031504	T/C	I/V	80	0.31	0.063	low	1.6	1.41	1.79	-0.35	0.448	0.267	0.29
	rs755598180	11:86031514	G/C	F/L	76	0	0.79	medium	2.075	2.36	1.79	-2.36	0.423	0.399	0.35
	rs748465366	11:86031539	G/C	T/S	68	0.13	0.003	low	1.1	2.2	0	-0.66	0.233	0.21	0.089
	rs772279792	11:86031540	T/A	T/S	68	0.13	0.003	low	1.1	2.2	0	-0.66	0.233	0.21	0.089
	rs772279792	11:86031540	T/C	T/A	68	0.63	0.001	neutral	-0.51	0.59	-1.61	-1.83	0.191	0.159	0.081
	rs141093733	11:86031578	T/C	N/S	55	0.79	0.015	neutral	0.19	0.09	0.29	-1.14	0.13	0.083	0.02
	rs769730320	11:86031588	T/C	M/V	52	1	0.031	neutral	0	0	0	-1.58	0.156	0.271	0.11
	rs775211588	11:86031594	T/G	N/H	50	0.02	0.021	low	1	0.21	1.79	-2.14	0.458	0.873	0.427
	rs762683708	11:86031599	C/T	C/Y	48	0	0.192	low	1.5	1.39	1.61	-0.03	0.714	0.871	0.667
	rs763758108	11:86031606	T/C	I/V	46	0.2	0.045	low	1.135	0.88	1.39	-0.76	0.154	0.109	0.03
	rs759002840	11:86068657	G/C	L/V	42	0.01	0.093	low	1.545	1.3	1.79	-1.29	0.198	0.457	0.142
	rs757415973	11:86068665	T/C	K/R	39	0.04	0.024	medium	2.085	2.56	1.61	-0.45	0.336	0.509	0.255
	rs781418654	11:86068667	C/G	K/N	38	0	1	medium	3.035	4.28	1.79	-0.47	0.795	0.838	0.678
	rs756151627	11:86068675	C/G	G/R	36	0.01	0.941	medium	2.25	2.89	1.61	-0.97	0.501	0.596	0.365
	rs201030001	11:86068677	A/G	M/T	35	0.01	0.058	low	1.175	1.25	1.1	0.69	0.342	0.502	0.316
	rs146840505	11:86068679	G/C	I/M	34	0.25	0.004	neutral	-0.345	0	-0.69	0.48	0.143	0.26	0.063
	rs558010093	11:86068681	T/C	I/V	34	1	0	neutral	-1.61	-1.61	-1.61	0.3	0.051	0.084	0.016
	rs773948451	11:86068687	G/C	H/D	32	0.02	0.031	low	1.585	1.56	1.61	-1.29	0.575	0.181	0.179
	rs771800238	11:86068708	T/C	T/A	25	1	0.068	neutral	-1.845	-2.08	-1.61	-1.32	0.047	0.285	0.037
	rs187561271	11:86068719	G/A	A/V	21	0	0.012	low	1.61	1.61	1.61	0.02	0.247	0.34	0.104
	rs776273405	11:86068750	T/C	T/A	11	1	0.002	neutral	-0.075	-0.15	0	-1.19	0.051		0.012
	rs751824714	11:86068761	G/C	T/R	7	0	0.134	medium	2.045	2.3	1.79	0.22	0.391		0.119
	rs867182591	11:86068773	C/T	G/D	3	0	0.996	medium	2.34	2.89	1.79	-0.83	0.43		0.194

## Sheet: S8B - SYNJ1
Gene	Variant	Chr bp	Alleles	AA	AA Coord.	SIFT score	PolyPhen	Mutation Assessor				I-Mutant	SNP&GO
								FI	FI score	VC score	VS score	DDG	PnD-SNP	PANTHER	SNP&GO
SYNJ1	rs111335712	21:32634880	T/C	E/G	1346	0.37	0.115					-0.73	0.084		0.022
1350 aa	rs780568261	21:32638909	T/C	Q/R	1344	0.04	0.932	medium	2.045	2.3	1.79	0.28	0.152		0.035
	rs751262506	21:32638912	G/A	P/L	1343	0.34	0	neutral	-0.29	-0.29	-0.29	1.28	0.055		0.021
	rs546986773	21:32638915	T/C	Q/R	1342	0.22	0.015	low	1.79	1.79	1.79	0.43	0.117		0.026
	rs778062243	21:32638939	C/T	S/N	1334	0.28	0	low	1.385	0.98	1.79	-0.2	0.023		0.006
	rs199989805	21:32638943	G/A	H/Y	1333	0.01	0.057	medium	1.995	2.2	1.79	1.23	0.136		0.027
	rs141669628	21:32638950	C/G	R/S	1330	0.04	0.023	medium	2.045	2.3	1.79	-1.77	0.251		0.059
	rs772148306	21:32638951	C/G	R/T	1330	0	0.031	medium	2.045	2.3	1.79	-1.24	0.255		0.048
	rs780038881	21:32638957	C/G	R/P	1328	0	0.689	medium	2.095	2.4	1.79	-0.34	0.273		0.097
	rs780038881	21:32638957	C/T	R/Q	1328	0	0.559	medium	2.095	2.4	1.79	-1.11	0.276		0.087
	rs768910270	21:32638973	G/C	P/A	1323	0	0.991	medium	2.095	2.4	1.79	0.08	0.156		0.032
	rs776337872	21:32638976	G/C	P/A	1322	0.26	0.257	medium	2.045	2.3	1.79	0.08	0.084		0.018
	rs761637283	21:32638985	A/T	L/M	1319	0	0.994	medium	2.095	2.4	1.79	-0.28	0.184		0.024
	rs769664150	21:32638987	T/C	N/S	1318	0.39	0	low	1.555	1.5	1.61	-0.34	0.042		0.007
	rs371076175	21:32638991	G/T	P/T	1317	0.02	0.641	low	1.935	2.08	1.79	-0.9	0.186		0.024
	rs375902516	21:32638996	G/A	P/L	1315	0.07	0.713	low	1.845	2.08	1.61	0.88	0.203		0.051
	rs766057048	21:32639004	C/A	Q/H	1312	0.11	0.526	low	1.43	1.25	1.61	-1.16	0.374		0.069
	rs751069566	21:32639012	T/C	M/V	1310	0.34	0.003	low	1.39	1.39	1.39	0.61	0.24		0.066
	rs566061880	21:32639015	G/T	P/T	1309	0.15	0.004	low	1.79	1.79	1.79	-1.56	0.323		0.05
	rs767170641	21:32639026	G/C	P/R	1305	0	0.393	medium	2.095	2.4	1.79	-0.3	0.549		0.219
	rs757637208	21:32639035	G/A	P/L	1302	0	0.835	medium	2.095	2.4	1.79	0.66	0.305		0.091
	rs779188682	21:32639036	G/A	P/S	1302	0.06	0.754	medium	2.095	2.4	1.79	-1.34	0.351		0.081
	rs758900160	21:32639043	C/A	L/F	1299	0.04	0.157	low	1.78	1.95	1.61	-0.51	0.323		0.06
	rs780163347	21:32639053	G/T	A/D	1296	0.14	0.051	low	1.67	1.95	1.39	0.61	0.291		0.071
	rs147025577	21:32639056	G/A	P/L	1295	0	0.282	medium	1.995	2.2	1.79	0.55	0.318		0.1
	rs138334718	21:32639057	G/A	P/S	1295	0.09	0.014	medium	1.995	2.2	1.79	-1.1	0.28		0.071
	rs141785091	21:32639059	G/A	P/L	1294	0.11	0.003	low	1.095	1.5	0.69	0.74	0.203		0.06
	rs141785091	21:32639059	G/C	P/R	1294	0.05	0.329	low	1.795	2.2	1.39	0.22	0.345		0.1
	rs749298495	21:32639063	G/A	P/S	1293	0.08	0.004	low	1.845	2.08	1.61	-0.67	0.198		0.046
	rs60376283	21:32639068	G/A	S/F	1291	0.01	0.11	low	1.39	1.39	1.39	0.96	0.401		0.106
	rs773778531	21:32639071	G/C	S/C	1290	0.02	0.599	low	0.895	1.1	0.69	0.23	0.286		0.073
	rs149288077	21:32639077	G/A	P/L	1288	0.52	0	low	0.895	1.1	0.69	0.51	0.088		0.026
	rs760251115	21:32639080	G/C	P/R	1287	0.03	0.653	medium	2.08	2.77	1.39	0.1	0.299		0.071
	rs866085400	21:32639081	G/A	P/S	1287	0.13	0.026	medium	2.08	2.77	1.39	-0.91	0.166		0.03
	rs548516848	21:32639101	A/G	L/P	1280	0.06	0.014	medium	2.045	2.48	1.61	-1.07	0.473		0.167
	rs2230766	21:32639102	G/T	L/M	1280	0.09	0.653	medium	2.045	2.48	1.61	-0.71	0.389		0.068
	rs751970113	21:32639104	G/A	P/L	1279	0	0.999	medium	2.415	3.04	1.79	-0.03	0.515		0.174
	rs755098852	21:32639105	G/A	P/S	1279	0.04	0.998	medium	2.415	3.04	1.79	-0.93	0.523		0.162
	rs781066636	21:32639120	T/A	T/S	1274	0.45	0.002	neutral	-0.55	-1.1	0	-0.18	0.08		0.023
	rs781066636	21:32639120	T/C	T/A	1274	0.82	0	neutral	-1.15	-1.61	-0.69	-0.92	0.053		0.021
	rs767695759	21:32639677	A/G	S/P	1270	1	0	neutral	-1.54	-1.47	-1.61	-0.96	0.056		0.014
	rs752805765	21:32639679	G/A	T/M	1269	0.25	0.075	neutral	0.695	1.39	0	-0.06	0.134		0.041
	rs139146760	21:32639716	T/C	R/G	1257	0.01	0.05	medium	2.275	2.94	1.61	-1.6	0.488		0.176
	rs372495350	21:32639722	C/A	A/S	1255	0.07	0.008	medium	2.05	2.71	1.39	0.51	0.259		0.088
	rs778501870	21:32639728	C/T	A/T	1253	0.44	0.05	neutral	0.55	1.1	0	-0.46	0.279		0.076
	rs144048853	21:32639730	C/T	R/Q	1252	0.13	0.007	low	1.79	1.79	1.79	-0.76	0.588		0.244
	rs779662077	21:32639731	G/A	R/W	1252	0	0.719	medium	2.135	2.48	1.79	-0.55	0.662		0.305
	rs779662077	21:32639731	G/C	R/G	1252	0.13	0.235	medium	2.135	2.48	1.79	-1.86	0.494		0.197
	rs386352368	21:32639733	G/A	A/V	1251	0.5	0.003	neutral	0.54	0.79	0.29	0.7	0.192		0.059
	rs386352368	21:32639733	G/T	A/E	1251	0.64	0.141	low	1.895	2.4	1.39	0.13	0.534		0.23
	rs769125182	21:32639734	C/T	A/T	1251	0.43	0.005	low	1.545	1.7	1.39	-0.46	0.251		0.071
	rs144155248	21:32639746	G/A	P/S	1247	0	0.878	medium	2.415	3.04	1.79	-1.4	0.53		0.19
	rs774568633	21:32639754	A/G	I/T	1244	0.08	0.007	medium	2.31	2.83	1.79	-2.52	0.36		0.116
	rs543639398	21:32639764	C/A	A/S	1241	0.06	0.276	medium	2.31	2.83	1.79	0.22	0.382		0.134
	rs376836481	21:32639766	C/T	R/H	1240	0	0.742	medium	1.995	2.2	1.79	-0.7	0.478		0.174
	rs114994257	21:32639767	G/A	R/C	1240	0	0.794	medium	2.34	2.89	1.79	-0.03	0.555		0.236
	rs760863245	21:32639773	G/A	P/S	1238	0.05	0.01	low	1.79	1.79	1.79	-2.34	0.601		0.235
	rs145937537	21:32639778	G/A	T/M	1236	0.1	0.006	low	1.795	2.2	1.39	0.03	0.405		0.112
	rs61752550	21:32641897	G/A	P/L	1235	0	0.382	medium	2.365	2.94	1.79	-0.72	0.639		0.277
	rs61752550	21:32641897	G/C	P/R	1235	0.01	0.054	medium	2.365	2.94	1.79	-1.37	0.689		0.328
	rs779766895	21:32641903	G/C	A/G	1233	0.13	0.002	low	1.04	1.39	0.69	-0.23	0.274		0.062
	rs77164494	21:32641904	C/G	A/P	1233	0.16	0.002	neutral	0.41	0.13	0.69	0.58	0.431		0.132
	rs780730508	21:32641909	C/A	S/I	1231	0.03	0.002	neutral	0.695	1.39	0	0.5	0.357		0.078
	rs747582266	21:32641910	T/C	S/G	1231	0.48	0	neutral	-0.66	-0.22	-1.1	-0.8	0.086		0.024
	rs777317691	21:32641928	G/C	P/A	1225	0.1	0.006	neutral	0.695	1.39	0	-1.27	0.128		0.028
	rs748917955	21:32641933	G/A	A/V	1223	0.23	0.002	low	1.04	1.39	0.69	0.73	0.211		0.05
	rs772565258	21:32641934	C/G	A/P	1223	0.56	0.002	neutral	0	0	0	0.54	0.203		0.049
	rs747574564	21:32641942	G/C	A/G	1220	0.29	0.002	neutral	0.285	0.98	-0.41	0.18	0.085		0.019
	rs376855373	21:32641949	G/A	P/S	1218	0.1	0.01	low	1.645	1.5	1.79	-1.04	0.336		0.073
	rs776889207	21:32641963	C/T	R/H	1213	0.09	0.008	low	1.32	1.95	0.69	0.18	0.576		0.216
	rs777025519	21:32642098	T/C	I/V	1211	0.48	0.001	neutral	0.345	0.69	0	-0.38	0.079		0.027
	rs748629930	21:32642112	G/A	T/I	1206	0.19	0.001	low	1.1	1.1	1.1	-1.39	0.231		0.078
	rs769768265	21:32642113	T/C	T/A	1206	0.78	0	neutral	0.405	-0.29	1.1	-1.03	0.139		0.054
	rs114618506	21:32642119	C/G	G/R	1204	0	0.319	low	1.59	1.39	1.79	-1.25	0.629		0.319
	rs773329386	21:32642122	G/A	P/S	1203	0.01	0.219	medium	1.995	2.2	1.79	-0.92	0.675		0.269
	rs763211395	21:32642127	T/C	K/R	1201	0.03	0.563	low	1.555	1.5	1.61	-0.02	0.331		0.103
	rs561276644	21:32643413	C/T	E/K	1198	0.04	0.01	neutral	0.35	0.41	0.29	-1.37	0.516		0.168
	rs774571965	21:32643425	T/C	R/G	1194	0	0.157	low	1.1	1.1	1.1	-1.48	0.236		0.059
	rs759691158	21:32643436	G/A	P/L	1190	0.03	0.651	medium	2.045	2.3	1.79	0.46	0.613		0.248
	rs373387769	21:32643440	T/C	S/G	1189	0.06	0.006	low	1.21	1.5	0.92	-1.16	0.237		0.071
	rs771833786	21:32643448	G/A	A/V	1186	0.03	0.123	low	1.845	2.08	1.61	0.27	0.527		0.162
	rs775339085	21:32643455	T/C	I/V	1184	0.59	0	neutral	0.345	0.69	0	-0.18	0.103		0.033
	rs142964720	21:32643457	C/T	G/D	1183	0.2	0.581	low	1.385	0.98	1.79	-0.82	0.417		0.129
	rs778963448	21:32644971	C/T	G/R	1182	0.07	0.041	medium	2.095	2.4	1.79	-1	0.605		0.244
	rs746142739	21:32644983	T/C	R/G	1178	0.1	0.367	medium	2.175	2.56	1.79	-1.15	0.534		0.196
	rs772312492	21:32644985	G/C	T/S	1177	0.44	0.003	neutral	-0.345	0	-0.69	0.41	0.141		0.037
	rs775185950	21:32644986	T/G	T/P	1177	0.13	0.094	neutral	0.345	0.69	0	-0.76	0.398		0.105
	rs569046864	21:32644988	G/A	P/L	1176	0.3	0.016	neutral	0.745	1.2	0.29	-0.09	0.481		0.139
	rs151126056	21:32644995	G/A	P/S	1174	0	0.529	medium	2.175	2.56	1.79	-0.76	0.321		0.058
	rs780343466	21:32645654	G/T	P/Q	1167	0.08	1	medium	2.415	3.04	1.79	-0.09	0.115		0.023
	rs866609752	21:32645655	G/T	P/T	1167	0.04	0.999	medium	2.415	3.04	1.79	-0.55	0.1		0.013
	rs768503724	21:32645667	G/C	Q/E	1163	0.01	0.977	medium	2.415	3.04	1.79	0.86	0.067		0.015
	rs748154988	21:32645669	G/C	P/R	1162	0.01	0.999	medium	2.305	3	1.61	0.15	0.236		0.047
	rs769822700	21:32645675	G/A	A/V	1160	0.15	0.016	medium	2.275	2.94	1.61	0.97	0.094		0.018
	rs773242399	21:32645678	G/A	P/L	1159	0	0.999	medium	2.305	3	1.61	0.73	0.09		0.02
	rs762546216	21:32645684	G/A	T/I	1157	0.03	0.051	low	0.895	1.1	0.69	0.63	0.041		0.01
	rs765746949	21:32645690	G/A	P/L	1155	0.03	0.999	medium	2.305	3	1.61	0.95	0.088		0.022
	rs372632176	21:32645691	G/T	P/T	1155	0.01	0.999	medium	2.305	3	1.61	-0.36	0.136		0.019
	rs759103240	21:32645694	C/T	A/T	1154	0.03	0.651	medium	2.22	2.83	1.61	-0.02	0.152		0.027
	rs527362526	21:32645697	C/T	V/I	1153	0.21	0.002	low	1.525	1.95	1.1	0.07	0.009		0.002
	rs754183983	21:32645706	G/T	P/T	1150	0.1	0.999	medium	2.395	3	1.79	-0.67	0.142		0.019
	rs765767792	21:32645714	G/A	P/L	1147	0.01	0.043	medium	2.365	2.94	1.79	0.61	0.127		0.031
	rs763783154	21:32645736	G/C	Q/E	1140	0.28	0.145	medium	2.16	2.71	1.61	0.31	0.117		0.026
	rs868044397	21:32645739	C/T	A/T	1139	0.46	0.002	neutral	0.145	0.29	0	-0.93	0.128		0.034
	rs758520394	21:32645753	G/A	P/L	1134	0.38	0	neutral	0.69	0.69	0.69	0.23	0.203		0.071
	rs779932426	21:32645771	T/C	Q/R	1128	0.13	0.066	medium	2.22	2.83	1.61	-0.32	0.286		0.067
	rs749302755	21:32646393	T/C	S/G	1122	0.63	0	neutral	-0.14	-0.69	0.41	-0.61	0.029		0.01
	rs745404497	21:32646413	G/C	P/R	1115	0.1	0.258	medium	2.045	2.3	1.79	0.15	0.061		0.018
	rs115685328	21:32646416	G/A	T/I	1114	0.1	0.046	medium	1.955	2.3	1.61	0.7	0.097		0.024
	rs771524798	21:32646425	G/T	P/Q	1111	0.02	0.03	low	1.9	2.01	1.79	-1.26	0.24		0.059
	rs141107054	21:32646431	C/T	R/Q	1109	0.02	0.997	medium	2.34	2.89	1.79	-1.15	0.264		0.065
	rs149817769	21:32646435	T/C	S/G	1108	0.04	0.184	medium	1.965	2.14	1.79	-0.84	0.093		0.02
	rs773437219	21:32646444	T/C	I/V	1105	1	0.001	neutral	-1.12	-0.85	-1.39	0.13	0.012		0.005
	rs376161689	21:32646446	G/C	P/R	1104	0.01	0.864	medium	2.34	2.89	1.79	-0.42	0.235		0.06
	rs376161689	21:32646446	G/T	P/H	1104	0.08	0.926	medium	2.34	2.89	1.79	-1.08	0.255		0.055
	rs759699908	21:32646447	G/A	P/S	1104	0.04	0.808	medium	2.34	2.89	1.79	-1.21	0.233		0.052
	rs767636058	21:32646453	A/G	S/P	1102	0.18	0.005	neutral	-0.28	-0.15	-0.41	-0.24	0.19		0.052
	rs753032623	21:32646459	C/A	V/L	1100	0.47	0	neutral	-0.14	0.41	-0.69	0.18	0.063		0.026
	rs777669288	21:32646468	C/T	E/K	1097	0.48	0.04	low	1.24	2.48	0	-0.96	0.065		0.025
	rs753541904	21:32646470	G/A	S/L	1096	0.13	0.017	low	1.5	1.61	1.39	-0.24	0.139		0.044
	rs757040942	21:32646473	A/C	I/R	1095	0.2	0.058	low	1.245	1.39	1.1	-1.43	0.156		0.067
	rs147931121	21:32646501	G/C	R/G	1086	0.17	0.005	medium	2.045	2.3	1.79	-1.84	0.198		0.057
	rs768275983	21:32646518	G/C	S/C	1080	0.01	0.806	medium	2.045	2.3	1.79	-0.91	0.072		0.013
	rs773666811	21:32646525	C/G	G/R	1078	0.01	0.082	medium	1.995	2.2	1.79	-0.17	0.143		0.047
	rs61752559	21:32646543	A/G	S/P	1072	0.34	0.078	low	1.1	1.1	1.1	-0.04	0.297		0.066
	rs376590419	21:32646556	C/A	Q/H	1067	0.01	0.976	medium	2.045	2.3	1.79	-0.4	0.238		0.046
	rs774723994	21:32646560	G/A	P/L	1066	0.03	0.987	medium	2.045	2.3	1.79	-0.31	0.371		0.115
	rs370400799	21:32646585	T/C	S/G	1058	0.3	0	low	1.79	1.79	1.79	-1.47	0.303		0.098
	rs775685969	21:32646587	T/C	Y/C	1057	0.15	0.599	low	1.79	1.79	1.79	0.36	0.652		0.311
	rs867930716	21:32646588	A/C	Y/D	1057	0.22	0.002	low	1.445	1.1	1.79	-1.87	0.512		0.241
	rs115353088	21:32646598	A/T	D/E	1053	0.14	0.094	medium	2.045	2.3	1.79	-0.65	0.492		0.249
	rs771265483	21:32650189	A/G	M/T	1050	0.39	0.062	low	1.905	2.2	1.61	-1.21	0.584		0.316
	rs774840980	21:32650208	C/T	V/I	1044	0.32	0.029	low	1.175	1.25	1.1	-1.14	0.237		0.075
	rs772671612	21:32650217	C/G	D/H	1041	0	0.934	medium	2.125	2.3	1.95	-0.02	0.537		0.155
	rs776726487	21:32650240	G/T	T/K	1033	0.02	0.219	low	1.7	1.79	1.61	-1.62	0.602		0.267
	rs762092902	21:32650241	T/C	T/A	1033	0.43	0.004	neutral	0.075	-0.77	0.92	-1.4	0.109		0.039
	rs115683257	21:32650278	C/A	M/I	1020	1	0.009	neutral	0.31	0.11	0.51	-0.84	0.2		0.056
	rs751440632	21:32650311	A/C	S/R	1009	0	0.694	low	1.735	2.08	1.39	-0.55	0.745		0.393
	rs537389515	21:32650312	C/G	S/T	1009	1	0.016	neutral	0.535	-0.32	1.39	-0.19	0.08		0.019
	rs371117480	21:32650336	C/T	R/Q	1001	0.06	0.046	medium	2.045	2.48	1.61	-0.7	0.419		0.144
	rs149147152	21:32650337	G/A	R/W	1001	0.01	0.849	medium	2.045	2.48	1.61	-0.73	0.751		0.345
	rs754401787	21:32650339	T/C	N/S	1000	0.02	0.027	neutral	0	0	0	1.14	0.441		0.199
	rs755765674	21:32650346	A/C	L/V	998	1	0.009	neutral	-0.55	-1.39	0.29	-0.78	0.051		0.018
	rs755535504	21:32653301	A/C	L/R	993	0.02	0.703	medium	2.215	2.48	1.95	-1.26	0.77		0.356
	rs753487763	21:32653313	T/A	N/I	989	0.09	0.255	low	1.1	1.1	1.1	1.85	0.505		0.171
	rs758843064	21:32653325	C/T	S/N	985	0.54	0.012	low	1.445	1.1	1.79	-0.47	0.423		0.125
	rs780563501	21:32653326	T/C	S/G	985	0.44	0.012	low	1.1	1.1	1.1	-1.84	0.261		0.072
	rs747531071	21:32653347	A/G	W/R	978	0.03	0.566	medium	2.215	2.48	1.95	-2.19	0.822		0.469
	rs546854566	21:32653348	C/T	M/I	977	0.07	0.241	medium	2.475	3	1.95	-0.8	0.753		0.492
	rs781171426	21:32653362	C/T	V/I	973	0.29	0.444	medium	2.215	2.48	1.95	-0.91	0.47		0.162
	rs748290648	21:32653364	A/G	F/S	972	0	0.979	medium	2.295	2.64	1.95	-2.53	0.83		0.456
	rs755258923	21:32656696	A/C	I/R	968	0.02	0.873	medium	2.095	2.4	1.79	-2.61	0.764		0.477
	rs755258923	21:32656696	A/G	I/T	968	0.16	0.05	low	1.545	1.3	1.79	-3.51	0.462		0.207
	rs748536661	21:32656712	T/G	S/R	963	0.05	0.016	neutral	0.345	0.69	0	-1	0.736		0.419
	rs769928312	21:32656719	C/G	Q/H	960	0.13	0.637	low	1.7	1.79	1.61	-2	0.436		0.186
	rs777815557	21:32656722	C/G	Q/H	959	0.04	0.022	medium	1.98	2.01	1.95	-2.01	0.661		0.289
	rs867564053	21:32656738	A/G	I/T	954	0.21	0.173	medium	2.215	2.48	1.95	-4.17	0.45		0.138
	rs776865344	21:32656748	C/T	D/N	951	0.04	0.549	medium	2.255	2.56	1.95	-0.86	0.618		0.268
	rs542405957	21:32656762	T/C	N/S	946	0.4	0.002	neutral	0	0	0	-1.15	0.103		0.044
	rs373328306	21:32656774	G/A	S/F	942	0	0.537	medium	2.095	2.4	1.79	-0.73	0.659		0.224
	rs760689512	21:32656822	G/A	A/V	926	0.02	0.315	medium	2.045	2.3	1.79	-0.97	0.316		0.134
	rs763757097	21:32656829	C/T	V/I	924	0.06	0.842	medium	2.1	2.25	1.95	0.16	0.049		0.015
	rs776262498	21:32656843	T/C	N/S	919	0.44	0.009	neutral	0.49	0.29	0.69	-0.27	0.143		0.1
	rs375526059	21:32656851	C/G	E/D	916	0.17	0.026	low	1.79	1.79	1.79	0.26	0.166		0.152
	rs200383173	21:32656853	C/T	E/K	916	0.6	0.005	low	1.79	1.79	1.79	-0.28	0.123		0.107
	rs767767965	21:32656870	A/G	F/S	910	0.4	0.063	medium	2.015	2.08	1.95	-1.87	0.466		0.228
	rs753305423	21:32656873	A/G	I/T	909	0.09	0.241	medium	2.175	2.4	1.95	-3.43	0.521		0.247
	rs377165480	21:32656878	T/C	I/M	907	0	0.574	low	1.87	1.95	1.79	-1.06	0.247		0.094
	rs542283936	21:32656879	A/G	I/T	907	0	0.493	low	1.87	1.95	1.79	-3.1	0.344		0.139
	rs777868977	21:32656883	C/A	D/Y	906	0	0.969	medium	2.255	2.56	1.95	-0.7	0.579		0.183
	rs114053718	21:32656885	A/G	I/T	905	0	0.365	medium	2.79	3.18	2.4	-3.41	0.427		0.202
	rs377350366	21:32656895	C/G	V/L	902	0.73	0.007	low	1.42	0.44	2.4	-1.36	0.255		0.145
	rs377350366	21:32656895	C/T	V/I	902	0.51	0.001	low	1.07	0.44	1.7	-0.87	0.123		0.054
	rs754281862	21:32657039	T/G	H/P	887	0	0.722	medium	2.195	3	1.39	-0.48	0.761		0.358
	rs757330059	21:32657040	G/A	H/Y	887	1	0.004	neutral	-0.965	-1.12	-0.81	-0.41	0.143		0.054
	rs370346211	21:32657057	G/A	T/I	881	0	0.356	low	1.12	0.85	1.39	-0.63	0.269		0.177
	rs370346211	21:32657057	G/T	T/N	881	0.85	0.002	neutral	-0.66	-1.1	-0.22	-1.3	0.254		0.155
	rs779943757	21:32657058	T/C	T/A	881	0.06	0.012	low	1.32	1.25	1.39	-1.01	0.181		0.138
	rs560413403	21:32657063	G/A	T/M	879	0.02	0.806	low	1.78	1.95	1.61	-0.63	0.428		0.233
	rs748032685	21:32657077	G/T	S/R	874	0.12	0.102	neutral	0.55	1.1	0	-0.63	0.597		0.271
	rs769402980	21:32657084	T/C	D/G	872	0.2	0.008	neutral	0.64	1.28	0	-0.37	0.355		0.145
	rs772572747	21:32657094	T/C	S/G	869	0.14	0.013	low	0.945	1.2	0.69	-1.05	0.272		0.089
	rs182699215	21:32657113	A/C	D/E	862	1	0.044	neutral	-0.935	-1.18	-0.69	-0.31	0.17		0.062
	rs376046993	21:32657115	C/A	D/Y	862	0	0.956	low	1.935	2.48	1.39	-0.45	0.585		0.174
	rs769587828	21:32657742	C/T	R/K	851	0.05	0.348	low	1.28	0.69	1.87	-1.87	0.119		0.06
	rs748767686	21:32657778	C/T	R/H	839	0	0.992	high	4.24	5.84	2.84	-0.94	0.658		0.386
	rs148265063	21:32657781	C/G	C/S	838	0.03	0.07	low	1.8	1.2	2.4	-0.43	0.267		0.145
	rs769069578	21:32657800	A/G	Y/H	832	0	0.986	high	4.085	5.53	2.64	-1.54	0.692		0.451
	rs765697918	21:32657826	T/C	Y/C	823	0	1	high	4.23	5.82	2.64	-0.64	0.888		0.767
	rs762956275	21:32657845	C/T	V/I	817	1	0.001	neutral	-1.78	-2.17	-1.39	-1.66	0.028		0.009
	rs200612458	21:32664915	G/C	Q/E	807	0.07	0.065	neutral	-0.03	-0.06	0	-0.11	0.251	0.083	0.079
	rs373953139	21:32664935	A/G	I/T	800	0.3	0.02	neutral	-1.23	-1.07	-1.39	-3.46	0.23	0.081	0.048
	rs763512920	21:32664952	T/C	I/M	794	0.1	0.145	neutral	0.595	1.19	0	-1.19	0.307	0.144	0.055
	rs766613161	21:32664953	A/G	I/T	794	0.2	0.021	neutral	0.225	1.55	-1.1	-2.7	0.4	0.237	0.142
	rs774540388	21:32664960	A/G	S/P	792	0.19	0.008	low	1.135	1.58	0.69	-1.24	0.698	0.341	0.503
	rs145978776	21:32664963	C/A	D/Y	791	0	0.296	medium	2.3	3.21	1.39	-0.79	0.668	0.496	0.332
	rs570501803	21:32664967	A/T	N/K	789	0	0.688	low	1.195	0.6	1.79	-0.65	0.281	0.127	0.064
	rs778437774	21:32665004	G/T	P/H	777	0	0.984	medium	2.5	3.21	1.79	-2.03	0.444	0.361	0.101
	rs745418083	21:32665007	A/G	L/P	776	0	0.981	medium	3.26	4.04	2.48	-2.32	0.868	0.917	0.861
	rs139455432	21:32665011	C/T	D/N	775	0.12	0.344	low	0.905	1	0.81	-1.2	0.466	0.14	0.118
	rs746606196	21:32665023	T/C	N/D	771	0	1	high	4.07	5.5	2.64	-1.65	0.729	0.454	0.485
	rs201485861	21:32665046	T/C	Y/C	763	0.01	0.519	medium	2.38	2.12	2.64	-0.39	0.808	0.72	0.694
	rs867547488	21:32665052	T/C	H/R	761	0	0.997	medium	3.35	4.06	2.64	0.38	0.884	0.871	0.87
	rs267606108	21:32665055	G/A	S/F	760	0.02	0.465	medium	2.965	3.29	2.64	-0.18	0.727	0.777	0.754
	rs746368700	21:32665944	A/T	M/K	754	0	0.262	low	1.005	-0.39	2.4	-2.15	0.503	0.253	0.223
	rs540251156	21:32665945	T/A	M/L	754	0.04	0.173	low	1.295	0.19	2.4	-0.95	0.336	0.17	0.116
	rs540251156	21:32665945	T/C	M/V	754	0.01	0.472	low	1.405	0.41	2.4	-0.34	0.37	0.266	0.163
	rs142478967	21:32665962	C/T	R/Q	748	0.39	0.832	neutral	0.765	0.94	0.59	-1.59	0.426	0.294	0.166
	rs147929290	21:32665968	A/G	I/T	746	0.03	0.951	medium	3.17	3.7	2.64	-2.42	0.806	0.435	0.633
	rs761614356	21:32665975	T/C	I/V	744	0.55	0	neutral	0.19	0.38	0	-1.09	0.088	0.138	0.016
	rs764946363	21:32665998	A/G	V/A	736	0.03	0.257	medium	2.155	1.83	2.48	-0.37	0.237	0.52	0.273
	rs112307178	21:32666007	T/C	Q/R	733	0.01	0.519	medium	2.135	2.4	1.87	-0.96	0.289	0.448	0.242
	rs750427690	21:32666028	C/A	C/F	726	0	0.997	high	3.865	5.09	2.64	-0.65	0.798	0.754	0.791
	rs377592740	21:32666032	C/T	V/I	725	0.33	0.683	low	0.845	1	0.69	-0.59	0.149	0.158	0.039
	rs751110096	21:32666038	A/C	C/G	723	0	0.996	medium	2.665	2.77	2.56	-2.59	0.83	0.86	0.826
	rs754395543	21:32666043	C/T	S/N	721	0.02	0.838	medium	2.7	2.76	2.64	-0.54	0.582	0.714	0.532
	rs752329752	21:32666050	T/C	T/A	719	0.16	0.055	neutral	-0.09	0.23	-0.41	-1.65	0.154	0.124	0.033
	rs746423709	21:32666092	T/C	T/A	705	0.57	0.326	neutral	-0.365	-0.44	-0.29	-0.64	0.199	0.124	0.059
	rs373820739	21:32666479	C/T	V/I	675	0.03	0.341	neutral	0.635	-0.52	1.79	-0.4	0.073	0.49	0.068
	rs773372851	21:32666499	G/A	A/V	668	0.04	0.173	low	1.42	1.23	1.61	0.22	0.232	0.251	0.058
	rs749119626	21:32666515	T/C	K/E	663	0.16	0.088	low	1.13	1.16	1.1	0.13	0.431	0.139	0.103
	rs770564458	21:32666516	G/C	N/K	662	0.02	0.008	neutral	-0.015	-0.03	0	-0.91	0.162	0.147	0.055
	rs377719553	21:32666518	T/C	N/D	662	0.01	0.158	neutral	-0.24	-0.48	0	-0.7	0.128	0.152	0.045
	rs759373807	21:32666544	T/G	E/A	653	0	0.475	neutral	0.545	-0.99	2.08	-1.33	0.049	0.173	0.018
	rs533986373	21:32666547	A/G	V/A	652	0.78	0.002	neutral	-0.64	-0.99	-0.29	-2.15	0.108	0.142	0.036
	rs760221186	21:32666560	T/G	K/Q	648	0.01	0.855	low	1.205	0.11	2.3	0.09	0.169	0.262	0.083
	rs768218829	21:32670324	A/G	M/T	631	0	0.856	medium	2.2	2.2	2.2	-2.44	0.691	0.517	0.728
	rs756845805	21:32670337	C/T	G/S	627	0	0.999	medium	3.02	3.4	2.64	-1.6	0.763	0.858	0.751
	rs370817503	21:32670355	T/C	T/A	621	0.9	0.012	neutral	-0.9	-1.51	-0.29	-1.59	0.118	0.217	0.024
	rs865889993	21:32670359	C/A	K/N	619	0.54	0.012	neutral	-0.32	-0.35	-0.29	-0.4	0.218		0.1
	rs775983474	21:32673340	C/A	D/Y	615	0	0.285	medium	3.13	3.86	2.4	-0.24	0.798	0.85	0.745
	rs761567892	21:32673362	T/G	L/F	607	0.04	0.078	medium	2.36	2.77	1.95	-0.45	0.357	0.451	0.177
	rs147684005	21:32673365	C/G	K/N	606	0.06	0.022	low	1.84	1.48	2.2	-0.42	0.31	0.325	0.197
	rs141001350	21:32673369	G/A	P/L	605	0.03	0.345	low	1.83	1.36	2.3	-0.48	0.582	0.351	0.187
	rs759897312	21:32673387	T/C	D/G	599	0	0.978	medium	2.545	2.45	2.64	0.77	0.606	0.194	0.109
	rs767862852	21:32673388	C/G	D/H	599	0.03	0.854	medium	2.89	3.14	2.64	0.03	0.585	0.548	0.343
	rs761144177	21:32673400	G/C	Q/E	595	0.46	0.017	neutral	0	-0.69	0.69	0.36	0.132	0.106	0.049
	rs764270943	21:32673416	G/T	S/R	589	0.01	0.995	medium	2.84	3.04	2.64	-0.52	0.705	0.517	0.599
	rs145712835	21:32673463	C/T	V/I	574	0.55	0.009	neutral	0.62	0.26	0.98	-0.99	0.044	0.127	0.017
	rs750585610	21:32673465	C/T	R/Q	573	0.06	0.957	medium	2.565	2.83	2.3	-1.48	0.585	0.235	0.233
	rs267606109	21:32673477	G/A	P/L	569	0.68	0.248	medium	2.61	3.14	2.08	-1.33	0.195	0.279	0.063
	rs746996252	21:32673489	T/C	K/R	565	0.05	0.013	low	0.895	0.69	1.1	-0.06	0.246	0.258	0.086
	rs781147009	21:32673507	A/G	M/T	559	0.01	0.097	medium	2.605	3.26	1.95	-0.53	0.621	0.617	0.609
	rs377639115	21:32673510	C/T	S/N	558	0.17	0.001	low	1.61	1.61	1.61	-0.34	0.213	0.133	0.04
	rs148901211	21:32673511	T/C	S/G	558	0.58	0.001	neutral	0.365	0.51	0.22	-3.03	0.156	0.188	0.026
	rs371301276	21:32673512	C/G	K/N	557	0.04	0.039	low	1.935	2.48	1.39	-0.28	0.434		0.18
	rs772803752	21:32673513	T/C	K/R	557	0.65	0.001	neutral	-0.315	-0.41	-0.22	-0.28	0.169		0.075
	rs113708828	21:32673520	C/A	V/L	555	0.17	0.014	low	1.165	1.64	0.69	-0.31	0.272		0.079
	rs113708828	21:32673520	C/T	V/I	555	1	0.008	neutral	0.675	0.66	0.69	-0.09	0.152		0.052
	rs115989459	21:32673531	G/A	A/V	551	0.07	0.017	low	1.57	0.94	2.2	-0.65	0.141		0.049
	rs756697570	21:32678647	C/T	R/H	542	0.44	0.001	neutral	-0.65	-1.3	0	-0.13	0.189	0.162	0.058
	rs115061921	21:32678648	G/A	R/C	542	0.1	0.676	low	1.59	1.79	1.39	-0.18	0.514	0.517	0.239
	rs745517821	21:32678666	A/C	L/V	536	0	0.685	medium	2.14	2.08	2.2	-0.79	0.127	0.337	0.064
	rs768961845	21:32678672	C/T	A/T	534	0.38	0.05	low	1.11	0.83	1.39	-0.61	0.154	0.245	0.069
	rs781599934	21:32678674	C/T	R/Q	533	0	0.848	medium	2.61	2.92	2.3	0.21	0.422	0.26	0.16
	rs748643269	21:32678678	C/T	A/T	532	0.06	0.41	low	1.495	1.49	1.5	-0.53	0.283	0.272	0.112
	rs773810747	21:32678704	G/C	T/S	523	0.23	0.074	low	1.21	0.34	2.08	-0.18	0.306	0.339	0.118
	rs771070426	21:32678728	A/G	I/T	515	0	0.969	medium	2.685	3.17	2.2	-3.5	0.693	0.751	0.653
	rs531923537	21:32678746	C/G	S/T	509	0.14	0.022	low	1.07	1.04	1.1	-0.74	0.192	0.273	0.07
	rs376762817	21:32678753	A/C	F/V	507	0.02	0.269	low	1.2	0.32	2.08	-3.26	0.243	0.162	0.061
	rs752563697	21:32678791	C/T	G/D	494	0	0.943	high	3.755	5.31	2.2	-1.74	0.687	0.623	0.632
	rs772361584	21:32681503	T/C	K/R	488	0.1	0.889	medium	2.16	2.24	2.08	-0.7	0.273	0.319	0.136
	rs775515863	21:32681507	C/T	G/R	487	0	0.988	medium	2.99	3.78	2.2	-1.81	0.795	0.798	0.79
	rs540825481	21:32681530	T/C	Y/C	479	0	0.966	high	4.26	6.32	2.2	0.68	0.885	0.943	0.795
	rs763870801	21:32681543	T/C	I/V	475	0.85	0.014	low	0.875	0.9	0.85	-1.7	0.199	0.168	0.056
	rs753833257	21:32681552	C/A	G/C	472	0	0.997	high	4.17	6.06	2.48	-0.95	0.912	0.956	0.877
	rs369372843	21:32681554	T/C	N/S	471	0.01	0.541	medium	2.49	3.28	1.7	-0.93	0.76	0.649	0.741
	rs764768244	21:32681555	T/C	N/D	471	0	0.979	high	4.125	5.85	2.4	-0.57	0.773	0.552	0.732
	rs749980859	21:32681558	C/T	V/M	470	0.22	0.012	low	1.39	1.39	1.39	-0.84	0.338	0.365	0.171
	rs143294126	21:32681567	T/C	M/V	467	0	0.067	low	1.52	1.09	1.95	-1.16	0.544	0.382	0.354
	rs757866772	21:32681608	T/C	K/R	453	0.03	0.829	low	1.32	1.25	1.39	-0.43	0.118	0.322	0.063
	rs779235991	21:32681611	T/C	E/G	452	0.1	0.059	low	1.285	0.78	1.79	-0.3	0.167	0.362	0.056
	rs745972290	21:32681621	C/G	G/R	449	0.03	0.04	medium	2.64	3.33	1.95	-1.33	0.817	0.177	0.346
	rs201835734	21:32681630	C/T	E/K	446	0.03	0.011	low	0.905	0.2	1.61	0.43	0.35	0.236	0.143
	rs775848061	21:32681645	G/C	L/V	441	0	0.994	medium	2.685	2.97	2.4	-0.83	0.574	0.224	0.177
	rs779479360	21:32684045	C/T	G/D	437	0	0.939	medium	3.39	4.83	1.95	-1.42	0.836	0.69	0.736
	rs746354059	21:32684055	C/T	A/T	434	0.82	0.023	neutral	0.525	-1.03	2.08	-1.34	0.655	0.29	0.287
	rs768897710	21:32684114	T/C	Q/R	414	0	0.999	high	4.46	6.44	2.48	-1.14	0.714	0.991	0.751
	rs757762568	21:32685752	G/C	Q/E	411	1	0.002	neutral	0.705	0.31	1.1	-0.25	0.178	0.131	0.069
	rs147544792	21:32685760	C/T	S/N	408	1	0.001	neutral	-0.24	-0.48	0	0.51	0.201	0.2	0.114
	rs562660511	21:32685766	T/C	N/S	406	0.76	0.001	neutral	-0.72	-0.19	-1.25	-1.91	0.239	0.095	0.044
	rs751662117	21:32685774	A/T	F/L	403	0	0.688	medium	2.3	2.3	2.3	-2.79	0.708	0.378	0.396
	rs533216340	21:32685785	A/T	Y/N	400	0.28	0.007	neutral	0.765	0.43	1.1	-1.09	0.49	0.217	0.198
	rs748368610	21:32685820	C/A	S/I	388	0.07	0.007	low	1.285	0.78	1.79	0.34	0.143	0.248	0.05
	rs748368610	21:32685820	C/G	S/T	388	0.3	0.004	low	1.2	1.3	1.1	0.42	0.077	0.189	0.026
	rs202234473	21:32685821	T/C	S/G	388	0.07	0.063	low	1.795	1.8	1.79	-1.35	0.086	0.377	0.042
	rs114942253	21:32685836	C/T	A/T	383	0.64	0.004	neutral	-0.35	-0.29	-0.41	-0.24	0.2	0.179	0.065
	rs770791591	21:32685852	C/T	M/I	377	0.41	0.012	neutral	-0.055	-1.21	1.1	-0.69	0.371	0.249	0.212
	rs774369121	21:32685872	T/G	N/H	371	0.07	0.016	neutral	0.25	-0.89	1.39	-2.68	0.222	0.456	0.156
	rs749045961	21:32686996	C/T	M/I	349	0.08	0.065	neutral	0.35	-0.69	1.39	0.62	0.139	0.279	0.074
	rs770689675	21:32687010	C/G	E/Q	345	0.05	0.985	medium	2.3	2.52	2.08	0.2	0.478	0.397	0.236
	rs112236895	21:32687016	A/G	S/P	343	0.02	0.033	medium	2.025	2.26	1.79	-1.43	0.729	0.619	0.692
	rs745787156	21:32687021	A/T	L/H	341	0	0.999	high	3.63	5.18	2.08	-0.86	0.771	0.954	0.776
	rs771755243	21:32687030	A/G	V/A	338	0	0.928	medium	2.8	3.65	1.95	-1.16	0.701	0.669	0.598
	rs775110785	21:32687037	T/C	I/V	336	1	0.01	neutral	-0.095	-0.19	0	-0.09	0.133	0.14	0.026
	rs2254562	21:32687042	T/C	K/R	334	0.04	0.105	low	1.125	0.86	1.39	-0.55	0.267	0.223	0.071
	rs554456240	21:32687043	T/G	K/Q	334	0.08	0.166	low	1.42	1.45	1.39	-0.19	0.316	0.132	0.046
	rs763234456	21:32687049	A/G	Y/H	332	0	0.998	medium	3.29	4.5	2.08	-0.9	0.867	0.971	0.735
	rs571120951	21:32687064	T/G	T/P	327	0.11	0.808	low	1.73	2.77	0.69	-2.88	0.668	0.393	0.342
	rs752120549	21:32687070	A/G	F/L	325	0.55	0.123	medium	2.22	2.49	1.95	-1.33	0.782	0.138	0.129
	rs565013600	21:32688306	C/T	R/K	323	0.06	0.773	low	1.065	-0.17	2.3	-1.95	0.201	0.163	0.055
	rs771336672	21:32688346	T/C	M/V	310	0	0.403	neutral	0.745	0.1	1.39	-0.14	0.3	0.168	0.083
	rs532075408	21:32688348	C/A	R/L	309	0	0.73	low	1.385	2.08	0.69	-0.27	0.571	0.485	0.491
	rs532075408	21:32688348	C/T	R/H	309	0.04	0.206	low	1.075	1.46	0.69	-1.25	0.396	0.584	0.348
	rs547450707	21:32688349	G/A	R/C	309	0	0.953	medium	2.36	4.03	0.69	-0.81	0.715	0.826	0.644
	rs201796096	21:32688354	C/T	R/H	307	0.58	0.82	low	1.275	0.94	1.61	-1.13	0.264	0.152	0.059
	rs750608040	21:32694252	C/G	L/F	294	0	0.939	medium	2.24	2.18	2.3	0.41	0.529	0.652	0.405
	rs762909719	21:32694268	C/T	R/Q	289	0	1	high	4.32	6.34	2.3	-1.77	0.734	0.992	0.723
	rs754917573	21:32694290	C/T	V/I	282	0.16	0.03	low	0.945	0.1	1.79	-0.82	0.075	0.259	0.049
	rs755675241	21:32695103	C/T	G/E	259	0	0.994	high	4.275	6.35	2.2	-0.93	0.868	0.996	0.866
	rs398122403	21:32695106	C/T	R/Q	258	0	0.978	high	4.265	6.33	2.2	-1.23	0.846	0.992	0.841
	rs753527253	21:32695114	A/C	F/L	255	0	0.424	medium	2.015	2.53	1.5	-2.24	0.595	0.719	0.742
	rs369586279	21:32695136	C/T	C/Y	248	0	0.981	medium	2.885	3.82	1.95	-0.41	0.713	0.65	0.636
	rs747414228	21:32695148	G/A	S/L	244	0	0.973	high	4.04	5.88	2.2	-0.04	0.655	0.876	0.691
	rs768835552	21:32695152	T/C	I/V	243	0.1	0.047	low	1.24	2.19	0.29	-0.62	0.185	0.282	0.095
	rs371958110	21:32695161	C/A	A/S	240	0	0.772	low	1.67	1.95	1.39	0.13	0.354	0.524	0.355
	rs371958110	21:32695161	C/G	A/P	240	0	0.213	medium	2.36	3.33	1.39	-0.56	0.759	0.741	0.756
	rs371958110	21:32695161	C/T	A/T	240	0.02	0.363	low	1.115	1.54	0.69	-0.72	0.259	0.484	0.26
	rs771210989	21:32695170	G/T	Q/K	237	0.14	0.12	low	1.06	0.33	1.79	-0.37	0.321	0.164	0.096
	rs774367309	21:32695179	C/T	A/T	234	0.01	0.395	neutral	0.5	0.31	0.69	-0.49	0.252	0.143	0.075
	rs767201457	21:32695206	C/T	G/R	225	0.08	0.786	low	1.7	1.61	1.79	-1.44	0.736	0.358	0.439
	rs760573856	21:32695213	C/T	M/I	222	0.46	0.062	neutral	0.01	-1.06	1.1	-1.35	0.115	0.165	0.037
	rs763977309	21:32695220	C/T	R/H	220	0	0.426	medium	2.105	2.42	1.79	-0.75	0.371	0.369	0.163
	rs577178051	21:32695221	G/A	R/C	220	0.02	0.12	low	1.645	1.5	1.79	-0.96	0.713	0.268	0.191
	rs866294600	21:32695229	C/A	W/L	217	0	0.8	medium	2.07	2.06	2.08	-1.68	0.78	0.39	0.535
	rs753368054	21:32695233	C/T	D/N	216	0.09	0.016	low	1.22	1.75	0.69	-0.26	0.353	0.172	0.105
	rs756663722	21:32695245	C/T	V/M	212	0	0.947	low	1.66	1.71	1.61	-1.35	0.197	0.578	0.206
	rs79433740	21:32695251	A/G	Y/H	210	0.24	0.314	low	1.285	0.78	1.79	-0.42	0.194	0.264	0.174
	rs750039424	21:32695263	G/A	H/Y	206	0.24	0.142	low	1.63	1.87	1.39	1.75	0.501	0.517	0.38
	rs781675993	21:32695279	A/C	N/K	200	0	0.99	high	3.505	4.93	2.08	-1.34	0.774	0.739	0.735
	rs375831365	21:32699847	C/G	R/T	196	0.01	0.988	medium	2.7	3.2	2.2	-1.19	0.666	0.338	0.319
	rs375831365	21:32699847	C/T	R/K	196	0.05	0.838	medium	2.15	2.1	2.2	-1.81	0.423	0.232	0.167
	rs766091867	21:32699862	T/C	Q/R	191	0.53	0	neutral	0.625	0.56	0.69	-0.2	0.279	0.154	0.09
	rs202061501	21:32699863	G/C	Q/E	191	0.93	0.001	neutral	0.25	-0.19	0.69	-0.13	0.17	0.13	0.071
	rs756493514	21:32699867	T/A/C	Q/H	189	0.11	0.375	low	1.645	1.9	1.39	-0.91	0.308	0.419	0.138
	rs749741780	21:32699877	C/T	R/H	186	0.04	0.269	low	1.575	2.05	1.1	-1.21	0.408	0.301	0.151
	rs111886678	21:32699883	G/A	A/V	184	0.03	0.22	low	0.94	0.49	1.39	-0.32	0.158	0.341	0.09
	rs780191673	21:32699908	T/C	I/V	176	0.68	0	neutral	0.605	1.21	0	-1.11	0.121	0.164	0.024
	rs771507886	21:32699910	C/T	G/D	175	0.07	0.147	low	1.485	1.36	1.61	-1.9	0.607		0.324
	rs768435291	21:32699958	C/T	R/Q	159	0.09	0.752	neutral	0.66	0.91	0.41	-2.34	0.337		0.167
	rs761635696	21:32699968	A/G	S/P	156	0.06	0.125	low	1.63	3.26	0	-2.63	0.371		0.121
	rs370189840	21:32699974	G/A	R/C	154	0	0.997	medium	3.205	4.11	2.3	-1.36	0.649		0.309
	rs367744455	21:32699982	T/A	D/V	151	0.09	0.141	low	1.38	2.07	0.69	-2.41	0.55		0.157
	rs762479235	21:32699983	C/A	D/Y	151	0	0.873	medium	2.85	3.91	1.79	-2.08	0.606		0.179
	rs762479235	21:32699983	C/T	D/N	151	0.14	0.14	low	1.465	1.14	1.79	-3.77	0.238		0.068
	rs751248342	21:32699985	G/A	S/L	150	0.05	0.035	low	1.04	0.47	1.61	-1.17	0.243		0.082
	rs761176395	21:32699986	A/C	S/A	150	0.21	0.026	neutral	0.495	0.07	0.92	-1.89	0.088		0.033
	rs764528223	21:32699991	T/C	D/G	148	0.07	0.022	low	1.67	1.73	1.61	-2.02	0.41		0.145
	rs757734263	21:32699997	C/T	R/Q	146	0.91	0.027	neutral	0.7	0.71	0.79	-2.09	0.157		0.091
	rs146507597	21:32700003	G/A	S/L	144	0.02	0.673	medium	2.305	2.53	2.08	-1	0.451		0.145
	rs779426150	21:32700006	A/G	I/T	143	0.02	0.493	medium	2.84	3.73	1.95	-2.9	0.355		0.114
	rs750481793	21:32700016	T/A	T/S	140	0.04	0.775	low	1.91	2.03	1.79	0.15	0.284		0.105
	rs758406227	21:32700027	C/T	R/Q	136	0.06	0.937	low	1.6	1	2.2	-1.07	0.263		0.12
	rs780321643	21:32700046	G/C	Q/E	130	0.31	0.636	low	1.315	1.02	1.61	0.38	0.207		0.097
	rs747219623	21:32700057	A/G	V/A	126	0	0.6	medium	2.205	2.11	2.3	-2.05	0.445		0.151
	rs768490351	21:32700058	C/A	V/F	126	0	0.989	high	3.65	5	2.3	-2.14	0.822		0.418
	rs780821209	21:32700064	T/A	M/L	124	0.67	0.01	neutral	-0.55	-0.69	-0.41	-0.61	0.199		0.117
	rs747937136	21:32700065	A/C	C/W	123	0	0.999	medium	2.95	4.11	1.79	0	0.811		0.49
	rs762562029	21:32700097	T/C	M/V	113	0.63	0.012	neutral	0.38	0.47	0.29	0.6	0.266		0.155
	rs372488661	21:32701973	G/A	R/W	106	0	0.93	high	3.595	4.99	2.2	-0.25	0.81		0.447
	rs375254567	21:32701979	C/T	V/I	104	0.1	0.896	neutral	0.215	-0.26	0.69	-1.15	0.152		0.066
	rs771831086	21:32701997	C/T	A/T	98	0	0.99	medium	2.55	3.02	2.08	-0.43	0.412		0.147
	rs771635470	21:32702042	C/T	A/T	83	0.19	0.05	medium	2.075	2.2	1.95	-0.97	0.342		0.114
	rs745374780	21:32726775	G/A	L/F	80	0	0.846	medium	2.445	2.94	1.95	-0.44	0.631		0.249
	rs188041355	21:32726787	C/A	A/S	76	0.05	0.082	medium	2.36	2.77	1.95	-0.61	0.361		0.153
	rs775063213	21:32726789	C/T	G/E	75	0.03	0.04	medium	2.215	2.48	1.95	-0.41	0.623		0.392
	rs770096593	21:32726800	C/A	M/I	71	0.01	0.017	low	1.61	1.61	1.61	-0.74	0.338		0.15
	rs199750187	21:32726813	T/G	E/A	67	0.08	0.027	low	1.645	1.5	1.79	-0.05	0.437		0.132
	rs766887493	21:32726819	T/G	H/P	65	0.02	0.002	neutral	0	0	0	0.93	0.727		0.349
	rs774776352	21:32726822	C/T	R/K	64	0.1	0.034	medium	2.39	2.83	1.95	-1.11	0.438		0.273
	rs767607949	21:32726835	T/C	I/V	60	0.08	0.042	medium	2.175	2.4	1.95	-0.48	0.169		0.067
	rs752898402	21:32726839	G/T	S/R	58	0	0.996	medium	2.445	2.94	1.95	-0.78	0.654		0.265
	rs756386071	21:32726840	C/T	S/N	58	0	0.992	medium	2.445	2.94	1.95	-0.87	0.536		0.182
	rs532311377	21:32726849	G/A	P/L	55	0.06	0.002	low	1.095	1.5	0.69	-0.62	0.508		0.217
	rs61755328	21:32726853	G/A	P/S	54	0.03	0.186	low	1.91	1.87	1.95	-1.74	0.631		0.271
	rs61755328	21:32726853	G/T	P/T	54	0	0.621	medium	2.255	2.56	1.95	-2.03	0.593		0.168
	rs565807712	21:32726855	T/C	D/G	53	0.02	0.042	low	1.825	1.7	1.95	-1.28	0.593		0.215
	rs779059079	21:32726858	A/G	L/S	52	0.21	0.074	low	1.23	0.51	1.95	-2.44	0.609		0.223
	rs750372776	21:32726863	G/C	H/Q	50	0.13	0.015	low	1.67	1.39	1.95	-0.58	0.437		0.114
	rs757895747	21:32726871	T/C	I/V	48	0.97	0.003	neutral	0.66	0.22	1.1	-0.14	0.085		0.044
	rs748690832	21:32726876	A/T	F/Y	46	0.87	0.011	neutral	-1.04	-0.13	-1.95	-0.73	0.305		0.085
	rs746463999	21:32726885	C/T	S/N	43	0.05	0.168	medium	2.33	2.71	1.95	-0.16	0.764		0.434
	rs780767341	21:32726900	C/G	R/T	38	0.2	0.587	neutral	0	0	0	-1.16	0.724		0.472
	rs568572939	21:32727961	C/T	R/K	27	0.26	0.364	neutral	0	0	0	-1.58	0.399		0.166
	rs747789973	21:32727977	C/T	G/R	22	0.15	0	neutral	0	0	0	-0.06	0.328		0.124
	rs771338654	21:32727982	C/T	G/D	20	0.03	0.005	neutral	0	0	0	0.06	0.527		0.243
	rs535611172	21:32727983	C/A	G/C	20	0.01	0.105	neutral	0	0	0	0	0.538		0.207
	rs779276328	21:32727986	C/T	G/S	19	0	0.01	neutral	0	0	0	0.12	0.524		0.23
	rs746182035	21:32727991	C/T	C/Y	17	0.02	0	neutral	0	0	0	-0.5	0.722		0.441
	rs775805673	21:32728006	T/C	D/G	12	0	0	neutral	0	0	0	-0.58	0.592		0.237
	rs760867966	21:32728008	A/C	S/R	11	0	0	neutral	0	0	0	-0.5	0.472		0.165
	rs768854034	21:32728009	C/T	S/N	11	0	0	neutral	0	0	0	0.12	0.48		0.128

## Sheet: S8C - SH3KBP1
Gene	Variant	Chr bp	Alleles	AA	AA Coord.	SIFT score	PolyPhen	Mutation Assessor				I-Mutant	SNP&GO
								FI	FI score	VC score	VS score	DDG	PnD-SNP	PANTHER	SNP&GO
SH3KBP1	rs11248	X:19536458	T/C	M/V	653	0.43	0.064	low	1.28	0.48	2.08	-0.11	0.373	0.168	0.112
665 aa	rs142403021	X:19537724	C/T	R/Q	650	0.13	0.607	low	1.14	1.3	0.98	-0.72	0.389	0.326	0.179
	rs748353385	X:19537725	G/A	R/W	650	0.01	0.989	medium	2.24	2.4	2.08	-0.43	0.599	0.785	0.349
	rs770229859	X:19537730	C/T	R/Q	648	0	0.951	medium	2.945	3.69	2.2	-1.07	0.817	0.668	0.658
	rs773402668	X:19537731	G/A	R/W	648	0.02	0.463	medium	2.25	3	1.5	-0.59	0.853	0.936	0.671
	rs777105719	X:19537744	T/G	E/D	643	0.06	0.99	medium	2.25	2.2	2.3	1.04	0.541	0.495	0.371
	rs199561036	X:19541941	T/A	M/L	626	1	0.094	low	0.82	-0.66	2.3	-0.64	0.115	0.1	0.038
	rs773816472	X:19541944	T/A	T/S	625	0.34	0.132	low	1.385	0.98	1.79	0.06	0.391	0.215	0.119
	rs759110258	X:19541947	C/G	E/Q	624	0	0.99	medium	2.915	3.53	2.3	-0.23	0.548	0.324	0.204
	rs759110258	X:19541947	C/T	E/K	624	0	0.963	medium	2.915	3.53	2.3	-0.9	0.723	0.269	0.363
	rs752570207	X:19541954	G/T	S/R	621	0.26	0.701	medium	2.095	2.4	1.79	-0.21	0.353	0.212	0.097
	rs373849479	X:19541965	C/T	E/K	618	0.01	0.895	medium	2.76	3.22	2.3	-0.38	0.739	0.269	0.379
	rs143279224	X:19541967	C/T	R/H	617	0.06	0.14	low	0.85	1.01	0.69	-1.46	0.556	0.31	0.172
	rs753630261	X:19541968	G/A	R/C	617	0	0.976	low	1.895	2.4	1.39	0.09	0.647	0.651	0.38
	rs757411815	X:19541979	C/G	R/T	613	0	0.064	medium	2.675	3.4	1.95	-1.08	0.563	0.239	0.183
	rs201469151	X:19541992	C/T	V/M	609	0.14	0.421	neutral	0.55	0.81	0.29	-0.16	0.144	0.22	0.036
	rs200596121	X:19541997	G/A	A/V	607	0.29	0.097	low	1.78	1.95	1.61	0.14	0.212	0.203	0.05
	rs770225201	X:19541998	C/A	A/S	607	1	0.043	neutral	-0.225	-0.45	0	-0.7	0.103	0.144	0.037
	rs749651652	X:19542006	C/T	S/N	604	0.6	0.791	low	1.905	2.2	1.61	0.81	0.127	0.175	0.03
	rs369126109	X:19542012	G/A	A/V	602	0.25	0.542	neutral	0.6	0.51	0.69	-0.26	0.125	0.117	0.022
	rs759196528	X:19542021	A/G	M/T	599	0.59	0.012	neutral	0.125	0.25	0	-0.43	0.182	0.049	0.03
	rs774887591	X:19542039	G/A	T/M	593	0.13	0.791	low	1.23	0.85	1.61	0.04	0.186	0.35	0.054
	rs760642189	X:19542042	C/T	G/D	592	0.29	0.005	low	1.65	2.2	1.1	-0.8	0.437	0.23	0.133
	rs138453824	X:19542043	C/T	G/S	592	0.88	0	neutral	-0.645	-0.44	-0.85	-0.23	0.053	0.059	0.012
	rs201884637	X:19542054	G/A	P/L	588	0	0.726	medium	2.62	3.04	2.2	-0.66	0.474	0.488	0.315
	rs755280140	X:19542072	C/G	G/A	582	0.26	0.794	low	1.69	1.3	2.08	-0.68	0.193	0.32	0.093
	rs758053411	X:19542084	A/C	L/W	578	0.18	0.869	low	1.935	2.08	1.79	-0.05	0.324	0.696	0.193
	rs767654497	X:19542097	G/C	L/V	574	0.58	0.005	low	1.79	1.79	1.79	0.71	0.077	0.094	0.01
	rs767654497	X:19542097	G/T	L/M	574	0.25	0.005	low	0.895	0.69	1.1	-0.53	0.03	0.076	0.004
	rs747279963	X:19542105	G/A	P/L	571	0.04	0.406	low	1.1	1.1	1.1	-1.17	0.131	0.231	0.037
	rs17851336	X:19542108	G/A	A/V	570	0.25	0.636	medium	2.015	2.08	1.95	0.91	0.104	0.243	0.025
	rs776375600	X:19542111	G/A	A/V	569	0.41	0.001	neutral	-0.35	-0.29	-0.41	0.91	0.034	0.052	0.006
	rs61744606	X:19542118	A/T	S/T	567	0.04	0.504	medium	2.175	2.4	1.95	-1.2	0.084	0.251	0.029
	rs765082210	X:19542126	G/T	A/D	564	0.48	0.714	low	1.61	1.61	1.61	0.18	0.417	0.29	0.164
	rs773162471	X:19542129	G/A	P/L	563	0	0.011	low	1.61	1.61	1.61	-0.4	0.247	0.204	0.075
	rs759809081	X:19542130	G/A	P/S	563	0.21	0.504	low	0.915	0.22	1.61	-1.1	0.152	0.137	0.043
	rs752813115	X:19542132	C/T	G/E	562	0.31	0.621	low	1.7	1.79	1.61	0.55	0.273	0.232	0.115
	rs113170456	X:19542136	C/A	G/C	561	0.01	0.936	low	1.7	1.79	1.61	-0.08	0.349	0.345	0.119
	rs113170456	X:19542136	C/T	G/S	561	0.65	0.067	neutral	0.2	0.18	0.22	-0.52	0.046	0.048	0.01
	rs149464659	X:19542159	G/A	P/L	553	0.02	0.398	low	1.875	2.25	1.5	-0.83	0.482	0.488	0.315
	rs746688290	X:19542178	C/A	A/S	547	0.24	0.25	low	1.87	1.79	1.95	-1.15	0.116	0.125	0.049
	rs767986829	X:19542183	T/C	N/S	545	0.48	0.011	low	1.885	1.47	2.3	-0.57	0.161	0.261	0.08
	rs61761898	X:19545924	G/C	Q/E	541	0.39	0.294	medium	2.43	2.56	2.3	0.72	0.178	0.227	0.089
	rs374218492	X:19545930	T/C	I/V	539	0.65	0.198	low	1.59	1.1	2.08	-0.84	0.051	0.109	0.014
	rs754680401	X:19545948	T/G	T/P	533	0.34	0.016	medium	2.19	2.3	2.08	-2.64	0.397	0.317	0.147
	rs747700708	X:19545959	G/A	A/V	529	0.43	0.001	neutral	-0.93	-0.88	-0.98	-0.62	0.089	0.063	0.016
	rs376095143	X:19545960	C/G	A/P	529	0.3	0.111	low	1.01	0.92	1.1	-1.28	0.449	0.295	0.184
	rs376095143	X:19545960	C/T	A/T	529	0.58	0.019	low	1.01	0.92	1.1	-0.05	0.164	0.132	0.052
	rs770562366	X:19545965	A/G	V/A	527	0.6	0.009	neutral	0.625	1.25	0	-2.35	0.111	0.218	0.047
	rs768965653	X:19546003	C/A	E/D	514	0.23	0.038	low	1.5	0.92	2.08	-0.59	0.209		0.047
	rs750863849	X:19546023	C/T	D/N	508	0.1	0.018	medium	2.33	2.71	1.95	-2.12	0.137	0.302	0.05
	rs763547701	X:19546029	T/C	I/V	506	0.63	0.017	neutral	0.14	-0.41	0.69	-1.18	0.02	0.094	0.006
	rs752002070	X:19546046	G/A	S/F	500	0	0.091	medium	2.36	2.64	2.08	-1.14	0.25	0.538	0.088
	rs769826150	X:19549978	G/A	T/I	497	0.02	0.002	medium	2.36	2.64	2.08	0.01	0.229	0.323	0.058
	rs760477895	X:19549979	T/C	T/A	497	0.34	0.001	medium	2.36	2.64	2.08	-0.28	0.13	0.186	0.044
	rs760002391	X:19550008	G/A	T/I	487	0.02	0.006	medium	2.215	2.64	1.79	0.09	0.191	0.39	0.081
	rs768002569	X:19550032	G/A	P/L	479	0.11	0.029	low	0.85	0.45	1.25	-0.58	0.316	0.569	0.254
	rs763646545	X:19550063	C/T	V/M	469	0	0.067	medium	2.495	3.04	1.95	-1.92	0.432	0.358	0.114
	rs771325046	X:19569105	A/G	I/T	461	0.39	0.002	neutral	0.795	-0.49	2.08	-3.55	0.389	0.251	0.121
	rs368494966	X:19569107	G/T	D/E	460	0.13	0.012	low	0.925	-0.23	2.08	-1.87	0.171	0.144	0.04
	rs370271414	X:19569115	T/C	S/G	458	0.06	0.012	medium	2.405	2.86	1.95	-1.24	0.52	0.266	0.077
	rs149913721	X:19569117	C/T	R/H	457	0.05	0.028	low	1.265	1.61	0.92	-1.46	0.347	0.388	0.197
	rs776018734	X:19569123	G/A	S/L	455	0.17	0.046	low	1.085	1.25	0.92	-2.21	0.506		0.083
	rs760379007	X:19569127	G/A	L/F	454	0.7	0.129	low	0.84	0.29	1.39	-0.41	0.155		0.024
	rs764969436	X:19569141	A/T	I/N	449	0.12	0.003	neutral	0.345	0	0.69	-2.11	0.358	0.245	0.149
	rs867132146	X:19569144	C/T	G/D	448	0.06	0.101	low	1.04	1.39	0.69	-1.5	0.48	0.211	0.135
	rs199599962	X:19569153	G/A	S/L	445	0.08	0.957	low	1.3	1.5	1.1	-1.87	0.254	0.279	0.096
	rs200272242	X:19569160	C/T	G/S	443	0.5	0.002	low	1.04	0.69	1.39	-1.76	0.225	0.424	0.156
	rs764658016	X:19569165	A/C	L/W	441	0.18	0.945	low	1.935	2.08	1.79	-0.24	0.497	0.7	0.236
	rs750338693	X:19569175	T/C	K/E	438	0.08	0.012	medium	2.24	2.4	2.08	-0.02	0.521	0.217	0.162
	rs374793970	X:19588650	G/T	H/N	431	0.27	0.005	medium	2.32	2.56	2.08	-3.29	0.505	0.466	0.382
	rs769375018	X:19588658	G/A	P/L	428	0.1	0.005	low	1.375	1.5	1.25	0.22	0.441	0.858	0.562
	rs765884745	X:19588667	G/A	P/L	425	0	0.013	medium	3.015	3.95	2.08	0.13	0.473	0.858	0.597
	rs767293120	X:19588676	G/A	P/L	422	0.01	0.002	medium	2.995	3.91	2.08	0.26	0.483	0.858	0.607
	rs483352756	X:19588683	T/C	R/G	420	0.02	0.005	medium	2.36	2.77	1.95	-0.72	0.343	0.495	0.245
	rs752483118	X:19588685	G/A	P/L	419	0	0	medium	2.16	2.37	1.95	0.53	0.187	0.569	0.193
	rs757468529	X:19588686	G/A	P/S	419	0.12	0.012	medium	2.16	3.07	1.25	-0.94	0.228	0.446	0.17
	rs201278502	X:19588704	T/C	R/G	413	0.01	0.012	medium	2.69	3.43	1.95	-0.9	0.373	0.495	0.209
	rs149782443	X:19588758	C/A	V/F	395	0.02	0.659	medium	2.075	2.2	1.95	-1.61	0.264	0.466	0.124
	rs149782443	X:19588758	C/T	V/I	395	0.31	0.421	low	1.375	1.5	1.25	-0.33	0.05	0.157	0.013
	rs758716608	X:19592071	T/G	E/D	378	0.74	0.012	low	0.995	0.66	1.25	-0.63	0.113	0.273	0.046
	rs751733126	X:19592102	C/A	R/I	368	0	0.012	medium	2.455	2.83	2.08	-0.24	0.327	0.621	0.229
	rs781609512	X:19592129	T/C	H/R	359	0.38	0	low	1.78	1.95	1.61	-0.95	0.183	0.16	0.074
	rs756363927	X:19592144	G/A	T/I	354	0.13	0.026	low	1.565	1.18	1.95	-1.23	0.231	0.424	0.126
	rs376122603	X:19594967	C/T	V/I	347	0.59	0.316	low	1.445	1.1	1.79	-0.77	0.061	0.171	0.017
	rs370075003	X:19594970	G/A	P/S	346	0.11	0.504	low	1.905	2.56	1.25	-1.19	0.278	0.482	0.198
	rs41311799	X:19594973	C/T	A/T	345	0.08	0.879	low	1.87	1.95	1.79	-0.26	0.297	0.343	0.161
	rs141396234	X:19607960	G/A	P/L	328	0.12	0.013	medium	2	2.9	1.1	-0.41	0.377	0.247	0.089
	rs201337827	X:19608006	C/T	G/S	313	0	0.033	medium	2.955	3.08	2.83	-1.44	0.901	0.937	0.823
	rs187770401	X:19608033	C/T	V/I	304	0.12	0.071	neutral	-0.11	-0.22	0	-0.67	0.181	0.171	0.132
	rs773077801	X:19608039	T/C	I/V	302	0.38	0.001	neutral	-0.795	-0.67	-0.92	-1.23	0.135	0.143	0.089
	rs781543115	X:19631877	G/C	T/S	295	0.44	0.927	low	1.155	1.62	0.69	-0.15	0.297	0.287	0.195
	rs369225656	X:19631899	T/C	I/V	288	0.05	0.069	neutral	0.135	0.27	0	-1.26	0.272	0.143	0.071
	rs112116302	X:19631934	A/T	F/Y	276	0.05	0.059	neutral	0.3	-1.01	1.61	-0.43	0.227	0.761	0.254
	rs747264448	X:19631949	T/C	Y/C	271	0	0.274	low	1.335	1.98	0.69	-0.06	0.563	0.781	0.505
	rs11552354	X:19631958	C/A	S/I	268	0.09	0.039	low	1.83	3.66	0	-0.81	0.189	0.317	0.063
	rs11552354	X:19631958	C/T	S/N	268	0.08	0.023	neutral	0.79	1.58	0	-1.45	0.171	0.26	0.058
	rs754698323	X:19645408	C/T	R/K	265	0.83	0.152	neutral	-0.105	-1.31	1.1	-2.56	0.047	0.243	0.037
	rs767110464	X:19645423	G/A	T/I	260	0.41	0.003	neutral	0.46	1.43	-0.51	-0.64	0.086	0.441	0.057
	rs145149747	X:19683833	G/A	P/L	239	0.06	0.016	medium	1.995	2.2	1.79	-0.6	0.381	0.589	0.314
	rs779503435	X:19683842	T/C	D/G	236	0.01	0.003	medium	2.045	2.48	1.61	-1.69	0.344	0.444	0.25
	rs777017532	X:19683852	C/T	V/I	233	0.24	0.034	low	1.87	1.95	1.79	-0.1	0.088	0.164	0.026
	rs200888929	X:19683862	C/A	R/S	229	0.13	0.004	medium	2.305	2.66	1.95	-2.42	0.499	0.442	0.351
	rs760343756	X:19683886	G/T	D/E	221	0.24	0.006	neutral	0.79	-0.21	1.79	-1.26	0.153	0.266	0.099
	rs768262772	X:19683888	C/T	D/N	221	0.06	0.004	low	1.525	1.95	1.1	-2.55	0.365	0.375	0.256
	rs764733680	X:19683957	C/T	G/R	198	0	0.714	medium	2.42	2.89	1.95	-1.93	0.325		0.101
	rs187106457	X:19683959	T/C	N/S	197	0.32	0.008	low	1.05	1.18	0.92	0.12	0.167		0.051
	rs369670367	X:19683984	T/C	S/G	189	0.23	0.007	low	1.155	1.39	0.92	-1.97	0.066		0.013
	rs756352996	X:19684017	T/C	T/A	178	0.54	0	low	1.175	1.25	1.1	-0.79	0.057	0.062	0.017
	rs745782204	X:19695656	G/A	S/L	159	0.08	0.028	low	1.795	2.2	1.39	-0.96	0.217	0.465	0.192
	rs759952134	X:19695678	T/C	I/V	152	0.84	0.682	neutral	-2.365	-1.84	-2.89	-0.51	0.076	0.138	0.043
	rs759952134	X:19695678	T/G	I/L	152	0.05	0.924	neutral	-0.03	-0.06	0	0.8	0.23	0.167	0.072
	rs756401306	X:19695683	T/C	N/S	150	0	0.999	medium	2.05	1.1	3	0.3	0.609	0.898	0.659
	rs141628714	X:19695717	C/T	V/I	139	0.42	0.345	neutral	0.37	0.74	0	-0.25	0.168	0.085	0.052
	rs368604551	X:19695741	C/A	V/L	131	0	0.997	low	0.88	1.07	0.69	0.36	0.339	0.528	0.526
	rs773851292	X:19706955	C/T	A/T	106	0.24	0.891	neutral	-0.58	-0.47	-0.69	-0.83	0.177	0.331	0.089
	rs769487115	X:19706970	G/A	R/C	101	0	0.994	low	1.735	1.86	1.61	-0.57	0.708	0.978	0.655
	rs774563910	X:19706975	C/T	R/Q	99	0.01	0.951	neutral	0.535	1.07	0	-0.91	0.201	0.404	0.105
	rs777591849	X:19746341	G/A	T/M	88	0.01	0.006	low	0.805	1.61	0	-0.33	0.143	0.591	0.15
	rs753698582	X:19746353	A/G	L/P	84	0.07	0.003	neutral	0.11	0.22	0	-0.03	0.545	0.703	0.464
	rs758605591	X:19746360	A/G	S/P	82	0.39	0.001	neutral	0.695	1.39	0	-0.4	0.47	0.402	0.264
	rs150089181	X:19746378	C/G	E/Q	76	0.05	0.033	neutral	0.55	1.1	0	-0.44	0.1	0.227	0.041
	rs150089181	X:19746378	C/T	E/K	76	0.04	0.003	neutral	0.55	1.1	0	-0.78	0.169	0.21	0.086
	rs200707424	X:19746379	G/C	H/Q	75	0.62	0.009	neutral	0.205	0.41	0	-0.8	0.102	0.198	0.051
	rs770274299	X:19746383	A/C	L/R	74	0.5	0.043	neutral	-0.55	-1.1	0	-1.17	0.455	0.529	0.315
	rs770274299	X:19746383	A/G	L/P	74	0.29	0.001	neutral	0	0	0	-0.95	0.583	0.613	0.369
	rs763356373	X:19746386	G/A	P/L	73	0.11	0.008	neutral	0.695	1.39	0	-0.78	0.247	0.574	0.216
	rs774102889	X:19746407	G/C	T/S	66	0.71	0.002	neutral	-0.695	-1.39	0	-1.17	0.025	0.051	0.007
	rs761786273	X:19836146	C/A	L/F	47	0.16	0.21	low	1.615	1.44	1.79	-0.55	0.56	0.294	0.2
	rs750282611	X:19836151	C/T	G/S	46	0	0.031	high	4.295	5.59	3	-1.34	0.936	0.916	0.856
	rs767573730	X:19836154	T/C	R/G	45	0	0.001	medium	2.815	4.02	1.61	-0.46	0.749	0.798	0.83
	rs752964138	X:19836159	C/T	G/D	43	0	0.096	medium	2.5	2.75	2.25	-0.96	0.941	0.956	0.885
	rs370417216	X:19836160	C/G	G/R	43	0	0.03	medium	3.205	3.47	2.94	-0.98	0.953	0.967	0.896
	rs370417216	X:19836160	C/T	G/S	43	0	0.033	medium	2.86	2.78	2.94	-0.99	0.898	0.924	0.836
	rs779417470	X:19836222	A/G	V/A	22	0.34	0.032	neutral	0.435	-0.38	1.25	-1.3	0.2	0.228	0.12
	rs143666089	X:19836226	T/C	S/G	21	0.08	0.013	low	1.105	2.21	0	-0.91	0.318	0.174	0.115
	rs746696313	X:19836243	T/C	D/G	15	0	0.032	low	1.425	1.93	0.92	-0.79	0.529	0.324	0.225
	rs766932945	X:19836244	C/G	D/H	15	0	0.19	medium	2.3	2.99	1.61	-0.56	0.453	0.485	0.221
	rs766932945	X:19836244	C/T	D/N	15	0.05	0.034	low	1.69	1.77	1.61	-0.14	0.265	0.264	0.121
	rs765215179	X:19836258	T/C	Y/C	10	0	0.112	medium	3.05	3.16	2.94	1.19	0.834	0.921	0.775
	rs191836984	X:19836268	C/G	E/Q	7	0.07	0.07	neutral	0.14	-0.64	0.92	-0.17	0.115	0.715	0.294

## Sheet: S8D - Summary
Gene	Variant	Chr bp	Alleles	AA	AA Coord.	SIFT score	PolyPhen	Mutation Assessor				I-Mutant	SNP&GO
								FI	FI score	VC score	VS score	DDG	PnD-SNP	PANTHER	SNP&GO
PICALM	rs765338634	11:86014880	A/G	L/P	179	0	0.989	medium	2.965	4.14	1.79	-2.29	0.838	0.913	0.692
652 aa	rs145115354	11:86022389	C/T	D/N	144	0	1	medium	3.04	4.29	1.79	-1.57	0.909	0.82	0.784
	rs780443419	11:86026315	A/G	F/S	109	0	0.994	medium	2.29	2.79	1.79	-2.81	0.869	0.854	0.794
	rs750147583	11:86026324	A/G	L/S	106	0	0.999	medium	2.82	3.85	1.79	-1.93	0.714	0.866	0.664
SYNJ1	rs745418083	21:32665007	A/G	L/P	776	0	0.981	medium	3.26	4.04	2.48	-2.32	0.868	0.917	0.861
1350 aa	rs147929290	21:32665968	A/G	I/T	746	0.03	0.951	medium	3.17	3.7	2.64	-2.42	0.806	0.435	0.633
	rs751110096	21:32666038	A/C	C/G	723	0	0.996	medium	2.665	2.77	2.56	-2.59	0.83	0.86	0.826
	rs756845805	21:32670337	C/T	G/S	627	0	0.999	medium	3.02	3.4	2.64	-1.6	0.763	0.858	0.751
	rs771070426	21:32678728	A/G	I/T	515	0	0.969	medium	2.685	3.17	2.2	-3.5	0.693	0.751	0.653
	rs752563697	21:32678791	C/T	G/D	494	0	0.943	high	3.755	5.31	2.2	-1.74	0.687	0.623	0.632
	rs775515863	21:32681507	C/T	G/R	487	0	0.988	medium	2.99	3.78	2.2	-1.81	0.795	0.798	0.79
	rs779479360	21:32684045	C/T	G/D	437	0	0.939	medium	3.39	4.83	1.95	-1.42	0.836	0.69	0.736
	rs768897710	21:32684114	T/C	Q/R	414	0	0.999	high	4.46	6.44	2.48	-1.14	0.714	0.991	0.751
	rs771755243	21:32687030	A/G	V/A	338	0	0.928	medium	2.8	3.65	1.95	-1.16	0.701	0.669	0.598
	rs762909719	21:32694268	C/T	R/Q	289	0	1	high	4.32	6.34	2.3	-1.77	0.734	0.992	0.723
	rs398122403	21:32695106	C/T	R/Q	258	0	0.978	high	4.265	6.33	2.2	-1.23	0.846	0.992	0.841
	rs781675993	21:32695279	A/C	N/K	200	0	0.99	high	3.505	4.93	2.08	-1.34	0.774	0.739	0.735
SH3KBP1	rs770229859	X:19537730	C/T	R/Q	648	0	0.951	medium	2.945	3.69	2.2	-1.07	0.817	0.668	0.658
665 aa
